# Supplementary material for: Palladium catalyzed isomerization of alkenes: a pronounced influence of an o-phenol hydroxyl group
Source: Royal Society of Chemistry journal article supplement (doi:10.1039/b907426k), 2009-01-01
Supplement: b907426k.pdf [file b907426k.pdf]

# **Palladium catalyzed isomerization of alkene: a pronounced influence of an *o*-phenol hydroxyl group**

Jinmin Fan, Changfeng Wan, Qiang Wang, Linfeng Gao, Xiaoqi Zheng  
and Zhiyong Wang\*

Hefei National Laboratory for Physical Science at Microscale, Joint- Lab of Green  
Synthetic Chemistry and Department of Chemistry  
University of Science and Technology of China  
Hefei, 230026 (P. R. China)  
Fax: (+86) 551-360-3185  
E-mail: zwang3@ustc.edu.cn

## **Contents:**

|                                                |                |
|------------------------------------------------|----------------|
| <b>General remarks</b>                         | <b>S2</b>      |
| <b>Synthesis of substrates 1a-1r</b>           | <b>S2-S4</b>   |
| <b>Characterization data of all substances</b> | <b>S4-S13</b>  |
| <b>NMR Spectra of all compounds</b>            | <b>S14-S57</b> |
| <b>NOESY Spectra of 2a</b>                     | <b>S58</b>     |

**General Remarks:**  $^1\text{H}$  NMR and  $^{13}\text{C}$  NMR were recorded on a Bruker AC-300 FT ( $^1\text{H}$ : 300 MHz,  $^{13}\text{C}$ : 75 MHz) using TMS as internal reference. The chemical shifts ( $\delta$ ) and coupling constants ( $J$ ) were expressed in ppm and Hz respectively. Infrared samples were recorded on a Perkin-Elmer 2000 FTIR spectrometer. Toluene was distilled from sodium/benzophenone. DCE was distilled from  $\text{CaH}_2$  and stored over 4 Å molsieves in screw-cap flask. DMSO and DMF was predried over 4 Å molsieves and stored in screw-cap flask. 4 Å molsieves was predried in oven at 250 °C for 48 h. All commercially available reagents were used as received.

## 1. General procedure for the isomerization of alkene:

$\text{PdCl}_2$  (8.8 mg, 0.05 mmol) and  $\text{FeCl}_3$  (8.1 mg, 0.05 mmol) were added to a solution of **1a** (112.0 mg, 0.5 mmol) in 1,2-dichloroethane (1.5 mL). The resulting mixture was warmed to 50 °C for 5 h, then the mixture was extracted with  $\text{CH}_2\text{Cl}_2$  twice. The combined organic extracts were dried over  $\text{Na}_2\text{SO}_4$  and filtered. Solvents were evaporated under reduced pressure. The residue was purified by column chromatography on silica gel using PE-EtOAc (20:1, v/v) as eluent to give **2a** as a yellow oil (103.0 mg, 92%).

## 2. Synthesis of substrates 1a-1r

### 2.1 Synthesis of substrates 1a-1m (Scheme SI-1).

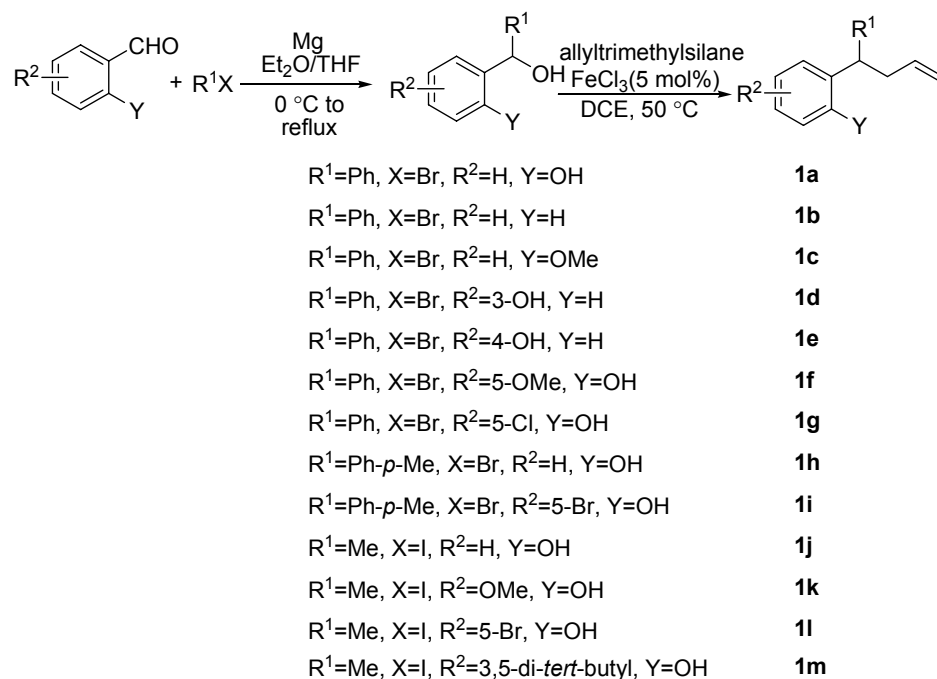

Scheme SI-1. synthesis of **1a-1m**.

### General procedure for the Grignard additions:



under N<sub>2</sub> atmosphere. Then the solvent was evaporated under reduced pressure and the residue was purified by column chromatography on silica gel using PE-EtOAc (20: 1 to 10: 1, v/v) as eluent to give **1n** as a yellow oil with 28% yield. (for **1o**, 20% yield was obtained, surprisingly, for **1p**, the yield was 62%).

#### Procedure for synthesis of **1r**

To a solution of **1q** and MeOH (20 equiv) in DCE was added FeCl<sub>3</sub> (10 mol%) quickly. The resulting mixture was warmed to 50 °C. After 5 h, the solvent was evaporated under reduced pressure and the residue was purified by column chromatography on silica gel using PE-EtOAc (10: 1, v/v) as eluent to give **1r** as a yellow oil with 74% yield.

### 2.3 Synthesis of deuterium substrate **1a-d** (Scheme SI-3)<sup>3</sup>

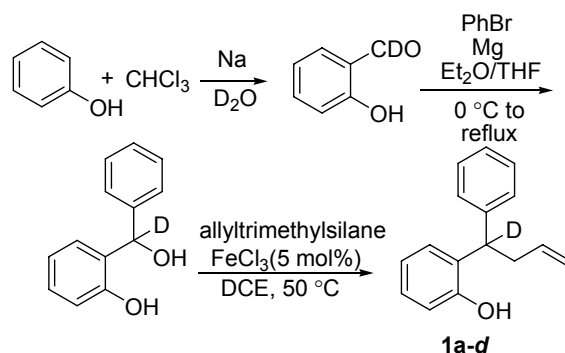

1. M. Yasuda, T. Saito, M. Ueba, A. Baba, *Angew. Chem.* **2004**, *116*, 1438-1440; *Angew. Chem. Int. Ed.* **2004**, *43*, 1414-1416.
2. Einhorn, C.; Luche, J.-L. *J. Organomet. Chem.* **1987**, *322*, 177-183.
3. For the procedure of Reimer-Tiemann reaction, see: D. S. Kemp, *J. Org. Chem.* 1971, *36*, 202.

### 3. Characterization data of all substances

#### 3.1. Characterization data for substrates 1a-1r

##### 2-(1-phenylbut-3-enyl)phenol (1a)

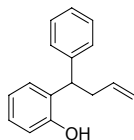

The title compound was a yellow oil.  $^1\text{H-NMR}$  ( $\text{CDCl}_3$ , 300 MHz, ppm):  $\delta = 7.35\text{-}7.17$  (m, 6 H), 7.11-7.06 (m, 1 H), 6.96-6.91 (m, 1 H), 6.71-6.68 (m, 1 H), 5.86-5.72 (m, 1 H), 5.09-4.96 (m, 2 H), 4.91 (s, 1 H), 4.36 (t,  $J = 7.8$  Hz, 1 H), 2.87-2.79 (m, 2 H);  $^{13}\text{C-NMR}$  ( $\text{CDCl}_3$ , 75 MHz, ppm):  $\delta = 153.5, 143.9, 137.0, 130.8, 128.7, 128.4, 128.0, 127.6, 126.6, 121.0, 116.5, 116.1, 44.4, 39.2$ ; IR (KBr,  $\text{cm}^{-1}$ ):  $\nu = 3535, 3064, 3028, 2925, 1639, 1593, 1494, 1453, 1328, 1197, 1116, 1087, 994, 913, 842, 752, 700$ ; GC-MS (EI) calc.  $\text{C}_{16}\text{H}_{16}\text{O}$  ( $\text{M}^+$ ): 224. Found: 224.

##### but-3-ene-1,1-diylidibenzene (1b)

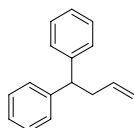

The title compound was a yellow oil.  $^1\text{H-NMR}$  ( $\text{CDCl}_3$ , 300 MHz, ppm):  $\delta = 7.27\text{-}7.20$  (m, 8 H), 7.16-7.12 (m, 2 H), 5.75-5.66 (m, 1 H), 5.04-4.91 (m, 2 H), 3.99 (t,  $J = 7.8$  Hz, 1 H), 2.83-2.77 (m, 2 H);  $^{13}\text{C-NMR}$  ( $\text{CDCl}_3$ , 75 MHz, ppm):  $\delta = 144.6, 137.0, 128.5, 128.1, 126.3, 116.4, 51.4, 40.1$ ; IR (KBr,  $\text{cm}^{-1}$ ):  $\nu = 3026, 2916, 1639, 1599, 1493, 1450, 1377, 1155, 1075, 1031, 970, 913, 844, 740, 699, 579$ ; GC-MS (EI) calc.  $\text{C}_{16}\text{H}_{16}$  ( $\text{M}^+$ ): 208. Found: 208.

##### 1-methoxy-2-(1-phenylbut-3-enyl)benzene (1c)

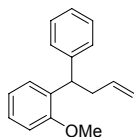

The title compound was a yellow oil.  $^1\text{H-NMR}$  ( $\text{CDCl}_3$ , 300 MHz, ppm):  $\delta = 7.23\text{-}7.18$  (m, 5 H), 7.13-7.09 (m, 2 H), 6.91-6.88 (m, 1 H), 6.78 (d,  $J = 8.4$  Hz, 1 H), 5.81-5.65 (m, 1 H), 5.03-4.88 (m, 2 H), 4.49 (t,  $J = 7.8$  Hz, 1 H), 3.70 (s, 3 H), 2.79-2.74 (m, 2 H);  $^{13}\text{C-NMR}$  ( $\text{CDCl}_3$ , 75 MHz, ppm):  $\delta = 157.3, 144.7, 137.5, 133.3, 128.5, 128.4, 128.1, 127.4, 126.1, 120.7, 116.1, 111.0, 55.7, 43.6, 39.4$ ; IR (KBr,  $\text{cm}^{-1}$ ):  $\nu = 3062, 3027, 2934, 1639, 1599, 1491, 1439, 1346, 1289, 1242, 1123, 1052, 1030, 994, 911, 842, 752, 699, 648, 591$ ; GC-MS (EI) calc.  $\text{C}_{17}\text{H}_{18}\text{O}$  ( $\text{M}^+$ ): 238. Found: 238.

##### 3-(1-phenylbut-3-enyl)phenol (1d)

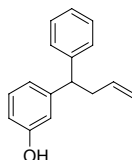

The title compound was a yellow oil.  $^1\text{H-NMR}$  ( $\text{CDCl}_3$ , 300 MHz, ppm):  $\delta$  = 7.18-7.09 (m, 6 H), 6.81 (d,  $J$  = 7.5 Hz, 1 H), 6.68-6.59 (m, 2 H), 5.74-5.63 (m, 1 H), 5.10 (br, 1 H), 5.04-4.91 (m, 2 H), 3.93 (t,  $J$  = 7.8 Hz, 1 H), 2.79-2.74 (m, 2 H);  $^{13}\text{C-NMR}$  ( $\text{CDCl}_3$ , 75 MHz, ppm):  $\delta$  = 155.1, 146.1, 143.8, 136.3, 129.1, 128.0, 127.5, 125.8, 120.0, 115.9, 114.5, 112.8, 50.6, 39.4; IR (KBr,  $\text{cm}^{-1}$ ):  $\nu$  = 3393, 3063, 3026, 2976, 1639, 1597, 1491, 1451, 1363, 1257, 1153, 1076, 997, 914, 875, 783, 700, 580; GC-MS (EI) calc.  $\text{C}_{16}\text{H}_{16}\text{O}$  ( $\text{M}^+$ ): 224. Found: 224.

#### 4-(1-phenylbut-3-enyl)phenol (1e)

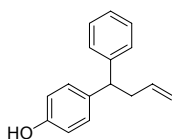

The title compound was a yellow oil.  $^1\text{H-NMR}$  ( $\text{CDCl}_3$ , 300 MHz, ppm):  $\delta$  = 7.25-7.12 (m, 5 H), 7.07 (d,  $J$  = 8.4 Hz, 2 H), 6.71 (d,  $J$  = 8.4 Hz, 2 H), 5.75-5.65 (m, 1 H), 5.33 (br, 1 H), 5.04-4.92 (m, 2 H), 3.93 (t,  $J$  = 7.8 Hz, 1 H), 2.78-2.73 (m, 2 H);  $^{13}\text{C-NMR}$  ( $\text{CDCl}_3$ , 75 MHz, ppm):  $\delta$  = 153.9, 145.1, 137.1, 137.0, 129.2, 128.6, 128.0, 126.3, 116.4, 115.5, 50.5, 40.3; IR (KBr,  $\text{cm}^{-1}$ ):  $\nu$  = 3386, 3026, 2929, 1612, 1510, 1498, 1449, 1360, 1237, 1159, 1065, 912, 845, 698, 576; GC-MS (EI) calc.  $\text{C}_{16}\text{H}_{16}\text{O}$  ( $\text{M}^+$ ): 224. Found: 224.

#### 4-methoxy-2-(1-phenylbut-3-enyl)phenol (1f)

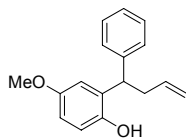

The title compound was a yellow oil.  $^1\text{H-NMR}$  ( $\text{CDCl}_3$ , 300 MHz, ppm):  $\delta$  = 7.41-7.30 (m, 5 H), 6.97 (s, 1 H), 6.76-6.70 (m, 2 H), 5.95-5.80 (m, 1 H), 5.20-5.08 (m, 2 H), 4.90 (s, 1 H), 4.45 (t,  $J$  = 7.8 Hz, 1 H), 3.87 (s, 3 H), 2.96-2.88 (m, 2 H);  $^{13}\text{C-NMR}$  ( $\text{CDCl}_3$ , 75 MHz, ppm):  $\delta$  = 153.8, 147.2, 143.0, 136.8, 132.1, 128.6, 128.2, 126.5, 116.7, 116.5, 114.7, 111.7, 55.8, 44.4, 39.0; IR (KBr,  $\text{cm}^{-1}$ ):  $\nu$  = 3412, 3027, 2936, 2834, 1639, 1600, 1505, 1431, 1333, 1286, 1201, 1095, 1042, 995, 912, 805, 700, 591; GC-MS (EI) calc.  $\text{C}_{17}\text{H}_{18}\text{O}_2$  ( $\text{M}^+$ ): 254. Found: 254.

#### 4-chloro-2-(1-phenylbut-3-enyl)phenol (1g)

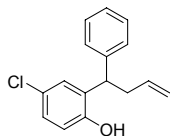

The title compound was a yellow oil.  $^1\text{H-NMR}$  ( $\text{CDCl}_3$ , 300 MHz, ppm):  $\delta$  = 7.46-7.35 (m, 6 H), 7.19-7.16 (m, 1 H), 6.78 (d,  $J$  = 8.7 Hz, 1 H), 5.95-5.80 (m, 1 H), 5.22-5.11 (m, 3 H), 4.43 (t,  $J$  = 7.8 Hz, 1 H), 2.95-2.89 (m, 2 H);  $^{13}\text{C-NMR}$  ( $\text{CDCl}_3$ , 75 MHz, ppm):  $\delta$  = 152.0, 142.9, 136.3, 132.6, 128.7, 128.2, 128.1, 127.2, 126.7, 125.7, 117.2, 116.8, 44.2, 38.8; IR (KBr,  $\text{cm}^{-1}$ ):  $\nu$  = 3533,

3078, 2926, 1640, 1600, 1492, 1450, 1414, 1321, 1266, 1198, 1162, 1111, 994, 916, 811, 700, 652;  
GC-MS (EI) calc. C<sub>16</sub>H<sub>15</sub>ClO (M<sup>+</sup>): 258. Found: 258.

#### 2-(1-p-tolylbut-3-enyl)phenol (1h)

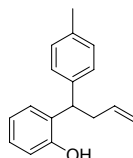

The title compound was a yellow oil. <sup>1</sup>H-NMR (CDCl<sub>3</sub>, 300 MHz, ppm): δ = 7.30-7.22 (m, 1 H), 7.17-7.08 (m, 5 H), 6.95-6.86 (m, 1 H), 6.71 (d, *J* = 7.8 Hz, 1 H), 5.35-5.18 (m, 1 H), 5.08-4.95 (m, 2 H), 4.83 (s, 1 H), 4.28 (t, *J* = 7.8 Hz, 1 H), 2.86-2.74 (m, 2 H), 2.30 (s, 3 H); <sup>13</sup>C-NMR (CDCl<sub>3</sub>, 75 MHz, ppm): δ = 153.5, 140.7, 137.0, 136.1, 130.9, 129.4, 128.4, 128.1, 127.5, 121.0, 116.5, 116.2, 43.9, 39.2, 21.2; IR (KBr, cm<sup>-1</sup>): ν = 3530, 3021, 2922, 1640, 1598, 1510, 1453, 1329, 1257, 1204, 1118, 1087, 1043, 994, 913, 818, 752, 718, 621; GC-MS (EI) calc. C<sub>17</sub>H<sub>18</sub>O (M<sup>+</sup>): 238. Found: 238.

#### 4-bromo-2-(1-p-tolylbut-3-enyl)phenol (1i)

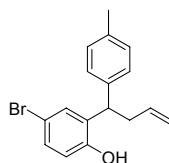

The title compound was a yellow oil. <sup>1</sup>H-NMR (CDCl<sub>3</sub>, 300 MHz, ppm): δ = 7.33 (m, 1 H), 7.17-7.07 (m, 5 H), 6.58 (d, *J* = 8.4 Hz, 1 H), 5.79-5.62 (m, 1 H), 5.12 (s, 1 H), 5.06-4.95 (m, 2 H), 4.22 (t, *J* = 7.8 Hz, 1 H), 2.83-2.72 (m, 2 H), 2.29 (s, 3 H); <sup>13</sup>C-NMR (CDCl<sub>3</sub>, 75 MHz, ppm): δ = 152.6, 139.7, 136.4, 133.2, 131.0, 130.1, 129.4, 127.9, 117.7, 116.7, 113.0, 43.9, 38.8, 21.0; IR (KBr, cm<sup>-1</sup>): ν = 3422, 2922, 1639, 1511, 1489, 1411, 1320, 1266, 1163, 1101, 1042, 993, 914, 811, 733, 629; HRMS calc. C<sub>17</sub>H<sub>17</sub>BrO (M<sup>+</sup>): 316.0463. Found: 316.0454.

#### 2-(pent-4-en-2-yl)phenol (1j)

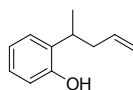

The title compound was a yellow oil. <sup>1</sup>H-NMR (CDCl<sub>3</sub>, 300 MHz, ppm): δ = 7.16 (d, *J* = 7.5 Hz, 1 H), 7.08-7.02 (m, 1 H), 6.92-6.87 (m, 1 H), 6.71 (d, *J* = 8.1 Hz, 1 H), 5.83-5.69 (m, 1 H), 5.06-4.90 (m, 2 H), 4.85 (s, 1 H), 3.18-3.11 (m, 1 H), 2.44-2.37 (m, 1 H), 2.33-2.26 (m, 1 H), 1.24 (d, *J* = 6.9 Hz, 3 H); <sup>13</sup>C-NMR (CDCl<sub>3</sub>, 75 MHz, ppm): δ = 153.0, 137.5, 133.0, 127.4, 126.9, 121.1, 116.2, 115.6, 41.4, 32.5, 20.2; IR (KBr, cm<sup>-1</sup>): ν = 3449, 3074, 2964, 1639, 1590, 1502, 1452, 1330, 1175, 994, 913, 828, 752; GC-MS (EI) calc. C<sub>11</sub>H<sub>14</sub>O (M<sup>+</sup>): 162. Found: 162.

#### 4-methoxy-2-(pent-4-en-2-yl)phenol (1k)

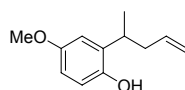

The title compound was a yellow oil. <sup>1</sup>H-NMR (CDCl<sub>3</sub>, 300 MHz, ppm): δ = 6.76 (d, *J* = 3.0 Hz, 1

H), 6.69 (d,  $J = 2.7$  Hz, 1 H), 6.63-6.60 (m, 1 H), 5.78-5.73 (m, 1 H), 5.14 (s, 1 H), 5.07-4.96 (m, 2 H), 3.77 (s, 3 H), 3.20-3.13 (m, 1 H), 2.49-2.35 (m, 1 H), 2.33-2.28 (m, 1 H), 1.24 (d,  $J = 6.9$  Hz, 3 H);  $^{13}\text{C}$ -NMR ( $\text{CDCl}_3$ , 75 MHz, ppm):  $\delta = 153.0, 146.3, 136.5, 133.6, 115.3, 112.7, 110.4, 55.0, 40.4, 31.8, 19.3$ ; IR (KBr,  $\text{cm}^{-1}$ ):  $\nu = 3411, 2962, 1640, 1610, 1505, 1431, 1344, 1289, 1269, 1201, 1041, 914, 872, 804, 711$ ; GC-MS (EI) calc.  $\text{C}_{12}\text{H}_{16}\text{O}_2$  ( $\text{M}^+$ ): 192. Found: 192.

#### 4-bromo-2-(pent-4-en-2-yl)phenol (1l)

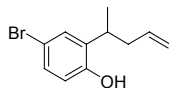

The title compound was a yellow oil.  $^1\text{H}$ -NMR ( $\text{CDCl}_3$ , 300 MHz, ppm):  $\delta = 7.25$  (s, 1 H), 7.16 (d,  $J = 8.1$  Hz, 1 H), 6.63 (d,  $J = 8.1$  Hz, 1 H), 5.82-5.65 (m, 1 H), 5.06-4.98 (m, 3 H), 3.18-3.06 (m, 1 H), 2.40-2.25 (m, 2 H), 1.24 (d,  $J = 6.3$  Hz, 3 H);  $^{13}\text{C}$ -NMR ( $\text{CDCl}_3$ , 75 MHz, ppm):  $\delta = 152.2, 136.9, 135.5, 130.3, 129.6, 117.3, 116.5, 113.2, 41.1, 32.6, 20.0$ ; IR (KBr,  $\text{cm}^{-1}$ ):  $\nu = 3449, 2956, 1639, 1491, 1413, 1321, 1268, 1168, 1103, 993, 915, 808, 630$ ; GC-MS (EI) calc.  $\text{C}_{11}\text{H}_{13}\text{BrO}$  ( $\text{M}^+$ ): 240. Found: 240.

#### 2,4-di-tert-butyl-6-(pent-4-en-2-yl)phenol (1m)

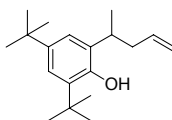

The title compound was a yellow oil.  $^1\text{H}$ -NMR ( $\text{CDCl}_3$ , 300 MHz, ppm):  $\delta = 7.19$  (d,  $J = 2.1$  Hz, 1 H), 7.07 (d,  $J = 2.1$  Hz, 1 H), 5.88-5.74 (m, 1 H), 5.12-5.02 (m, 2 H), 4.79 (s, 1 H), 3.04-2.97 (m, 1 H), 2.43-2.31 (m, 2 H), 1.45 (s, 9 H), 1.32 (s, 9 H);  $^{13}\text{C}$ -NMR ( $\text{CDCl}_3$ , 75 MHz, ppm):  $\delta = 149.1, 142.3, 137.2, 134.6, 131.7, 121.5, 121.0, 116.5, 41.8, 34.9, 34.3, 32.8, 31.7, 30.1, 20.4$ ; IR (KBr,  $\text{cm}^{-1}$ ):  $\nu = 3407, 2960, 1640, 1476, 1417, 1361, 1294, 1188, 1117, 1043, 914, 877, 818, 764, 646$ ; HRMS calc.  $\text{C}_{19}\text{H}_{30}\text{O}$  ( $\text{M}^+$ ): 274.2297. Found: 274.2292.

#### 2-(but-3-enyl)phenol (1n)

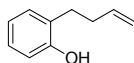

The title compound was a yellow oil.  $^1\text{H}$ -NMR ( $\text{CDCl}_3$ , 300 MHz, ppm):  $\delta = 7.16$ -7.08 (m, 2 H), 6.92-6.87 (m, 1 H), 6.77 (d,  $J = 7.8$  Hz, 1 H), 5.97-5.88 (m, 1 H), 5.13-5.00 (m, 2 H), 4.88 (s, 1 H), 2.74-2.71 (m, 2 H), 2.44-2.37 (m, 2 H);  $^{13}\text{C}$ -NMR ( $\text{CDCl}_3$ , 75 MHz, ppm):  $\delta = 152.8, 137.5, 129.5, 127.1, 126.5, 120.1, 114.6, 114.3, 33.1, 28.4$ ; IR (KBr,  $\text{cm}^{-1}$ ):  $\nu = 3443, 2926, 1639, 1591, 1503, 1455, 1330, 1234, 1170, 1116, 1042, 996, 912, 848, 752$ ; GC-MS (EI) calc.  $\text{C}_{10}\text{H}_{12}\text{O}$  ( $\text{M}^+$ ): 148. Found: 148.

#### 4-bromo-2-(but-3-enyl)phenol (1o)

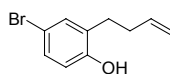

The title compound was a yellow oil.  $^1\text{H}$ -NMR ( $\text{CDCl}_3$ , 300 MHz, ppm):  $\delta = 7.25$ -7.23 (m, 1 H), 7.19-7.15 (m, 1 H), 6.64 (d,  $J = 8.4$  Hz, 1 H), 5.92-5.74 (m, 1 H), 5.09-4.99 (m, 2 H), 4.81 (s, 1 H), 2.69-2.64 (m, 2 H), 2.38-2.34 (m, 2 H);  $^{13}\text{C}$ -NMR ( $\text{CDCl}_3$ , 75 MHz, ppm):  $\delta = 152.3, 137.8, 133.0$ ,



130.0, 129.7, 117.1, 115.6, 112.6, 33.6, 29.6; IR (KBr,  $\text{cm}^{-1}$ ):  $\nu = 3423, 2927, 1633, 1491, 1411, 1266, 1165, 1115, 914, 807, 627$ ; HRMS calc.  $\text{C}_{10}\text{H}_{11}\text{BrO}$  ( $\text{M}^+$ ): 225.9993. Found: 225.9988.

#### 2-(but-3-enyl)-4,6-di-tert-butylphenol (1p)

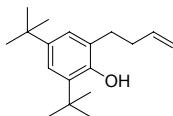

The title compound was a yellow oil.  $^1\text{H-NMR}$  ( $\text{CDCl}_3$ , 300 MHz, ppm):  $\delta = 7.18$  (d,  $J = 2.4$  Hz, 1 H), 7.01 (d,  $J = 2.4$  Hz, 1 H), 5.95-5.84 (m, 1 H), 5.14-5.01 (m, 2 H), 4.72 (s, 1 H), 2.68-2.63 (m, 2 H), 2.42-2.36 (m, 2 H), 1.43 (s, 9 H), 1.29 (s, 9 H);  $^{13}\text{C-NMR}$  ( $\text{CDCl}_3$ , 75 MHz, ppm):  $\delta = 150.1, 142.5, 138.3, 135.4, 126.8, 124.7, 122.2, 115.7, 34.5, 34.2, 31.9, 30.5, 30.2, 29.9$ ; IR (KBr,  $\text{cm}^{-1}$ ):  $\nu = 2957, 2868, 1640, 1479, 1416, 1296, 1194, 1149, 997, 913, 877, 761$ ; HRMS calc.  $\text{C}_{18}\text{H}_{28}\text{O}$  ( $\text{M}^+$ ): 260.2140. Found: 260.2146.

#### 2-(1-methoxybut-3-enyl)phenol (1r)

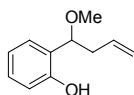

The title compound was a yellow oil.  $^1\text{H-NMR}$  ( $\text{CDCl}_3$ , 300 MHz, ppm):  $\delta = 7.85$  (s, 1 H), 7.21-7.16 (m, 1 H), 6.95-6.92 (m, 1 H), 6.88-6.80 (m, 2 H), 5.81-5.72 (m, 1 H), 5.11-5.05 (m, 2 H), 4.34-4.30 (m, 1 H), 3.40 (s, 3 H), 2.70-2.63 (m, 1 H), 2.53-2.46 (m, 1 H);  $^{13}\text{C-NMR}$  ( $\text{CDCl}_3$ , 75 MHz, ppm):  $\delta = 155.5, 134.2, 129.2, 128.6, 119.8, 117.7, 117.0, 85.6, 57.4, 40.5$ ; IR (KBr,  $\text{cm}^{-1}$ ):  $\nu = 3373, 2936, 1641, 1586, 1490, 1457, 1351, 1239, 1080, 997, 917, 837, 755$ ; GC-MS (EI) calc.  $\text{C}_{11}\text{H}_{14}\text{O}_2$  ( $\text{M}^+$ ): 178. Found: 178.

#### Deuterium 2-(1-phenylbut-3-enyl)phenol (1a-d)

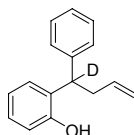

The title compound was a yellow oil.  $^1\text{H-NMR}$  ( $\text{CDCl}_3$ , 300 MHz, ppm):  $\delta = 7.35$ -7.17 (m, 6 H), 7.11-7.06 (m, 1 H), 6.96-6.91 (m, 1 H), 6.71-6.68 (m, 1 H), 5.86-5.72 (m, 1 H), 5.09-4.96 (m, 2 H), 4.91 (s, 1 H), 2.87-2.79 (m, 2 H);  $^{13}\text{C-NMR}$  ( $\text{CDCl}_3$ , 75 MHz, ppm):  $\delta = 153.5, 143.9, 137.0, 130.8, 128.7, 128.4, 128.0, 127.6, 126.6, 121.0, 116.5, 116.1, 44.4, 39.2$ ; IR (KBr,  $\text{cm}^{-1}$ ):  $\nu = 3535, 3064, 3028, 2925, 1639, 1593, 1494, 1453, 1328, 1197, 1116, 1087, 994, 913, 842, 752, 700$ ; HRMS calc.  $\text{C}_{16}\text{H}_{15}\text{DO}$  ( $\text{M}^+$ ): 225.1264. Found: 225.1269.

### 3.1. Characterization data for products

#### (E)-2-(1-phenylbut-1-enyl)phenol (2a)

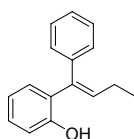

The title compound was a yellow oil.  $^1\text{H-NMR}$  ( $\text{CDCl}_3$ , 300 MHz, ppm):  $\delta = 7.26$ -7.21 (m, 6 H),

7.04-6.90 (m, 3 H), 6.37 (t,  $J = 7.5$  Hz, 1 H), 5.06 (s, 1 H), 2.05 (dq,  $J_1 = 7.5$  Hz,  $J_2 = 7.5$  Hz, 2 H), 1.02 (t,  $J = 7.5$  Hz, 3 H);  $^{13}\text{C}$ -NMR ( $\text{CDCl}_3$ , 75 MHz, ppm):  $\delta = 153.1, 140.5, 135.2, 135.1, 130.8, 129.3, 128.7, 127.7, 126.6, 125.8, 120.7, 115.5, 23.5, 14.2$ ; IR (KBr,  $\text{cm}^{-1}$ ):  $\nu = 3524, 2966, 2872, 1580, 1486, 1449, 1334, 1284, 1193, 1148, 1033, 910, 828, 755, 698$ ; HRMS calc.  $\text{C}_{16}\text{H}_{16}\text{O}$  ( $\text{M}^+$ ): 224.1201. Found: 224.1204.

**(E)-4-methoxy-2-(1-phenylbut-1-enyl)phenol (2f)**

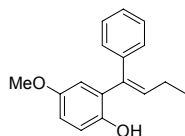

The title compound was a yellow oil.  $^1\text{H}$ -NMR ( $\text{CDCl}_3$ , 300 MHz, ppm):  $\delta = 7.35$ -7.12 (m, 5 H), 6.91-6.80 (m, 2 H), 6.56 (s, 1 H), 6.36 (t,  $J = 7.5$  Hz, 1 H), 4.73 (s, 1 H), 3.72 (s, 3 H), 2.06 (dq,  $J_1 = 7.5$  Hz,  $J_2 = 7.5$  Hz, 2 H), 1.03 (t,  $J = 7.5$  Hz, 3 H);  $^{13}\text{C}$ -NMR ( $\text{CDCl}_3$ , 75 MHz, ppm):  $\delta = 153.7, 147.2, 135.8, 134.9, 129.2, 128.6, 127.6, 126.5, 116.5, 116.0, 115.7, 115.4, 55.8, 23.4, 14.0$ ; IR (KBr,  $\text{cm}^{-1}$ ):  $\nu = 3528, 2964, 2872, 1596, 1491, 1446, 1360, 1274, 1212, 1145, 1039, 952, 852, 772, 697$ ; HRMS (EI) calc.  $\text{C}_{17}\text{H}_{18}\text{O}_2$  ( $\text{M}^+$ ): 254.1307. Found: 254.1302.

**(E)-4-chloro-2-(1-phenylbut-1-enyl)phenol (2g)**

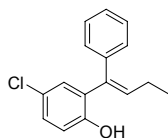

The title compound was a yellow oil.  $^1\text{H}$ -NMR ( $\text{CDCl}_3$ , 300 MHz, ppm):  $\delta = 7.30$ -7.21 (m, 6 H), 7.04-6.92 (m, 2 H), 6.40 (t,  $J = 7.5$  Hz, 1 H), 5.07 (s, 1 H), 2.07 (dq,  $J_1 = 7.5$  Hz,  $J_2 = 7.5$  Hz, 2 H), 1.06 (t,  $J = 7.5$  Hz, 3 H);  $^{13}\text{C}$ -NMR ( $\text{CDCl}_3$ , 75 MHz, ppm):  $\delta = 152.2, 135.7, 133.4, 130.1, 129.1, 128.7, 127.8, 126.5, 116.7, 23.4, 13.9$ ; IR (KBr,  $\text{cm}^{-1}$ ):  $\nu = 3522, 2966, 2872, 1597, 1480, 1408, 1326, 1266, 1194, 1079, 943, 881, 764, 666$ ; HRMS calc.  $\text{C}_{16}\text{H}_{15}\text{ClO}$  ( $\text{M}^+$ ): 258.0811. Found: 258.0816.

**(E)-2-(1-p-tolylbut-1-enyl)phenol (2h)**

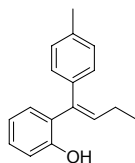

The title compound was a yellow oil.  $^1\text{H}$ -NMR ( $\text{CDCl}_3$ , 300 MHz, ppm):  $\delta = 7.24$ -6.92 (m, 8 H), 6.34 (t,  $J = 7.5$  Hz, 1 H), 5.04 (s, 1 H), 2.31 (s, 3 H), 2.04 (dq,  $J_1 = 7.5$  Hz,  $J_2 = 7.5$  Hz, 2 H), 1.01 (t,  $J = 7.5$  Hz, 3 H);  $^{13}\text{C}$ -NMR ( $\text{CDCl}_3$ , 75 MHz, ppm):  $\delta = 153.5, 138.2, 135.3, 134.0, 130.6, 130.4, 129.3, 129.1, 128.8, 126.4, 120.5, 120.3, 115.3, 23.3, 21.1, 14.0$ ; IR (KBr,  $\text{cm}^{-1}$ ):  $\nu = 3515, 2965, 2872, 1606, 1484, 1457, 1334, 1284, 1196, 1035, 932, 817, 754, 685$ ; HRMS calc.  $\text{C}_{17}\text{H}_{18}\text{O}$  ( $\text{M}^+$ ): 238.1358. Found: 238.1353.

**(E)-4-bromo-2-(1-p-tolylbut-1-enyl)phenol (2i)**

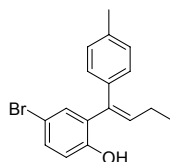

The title compound was a yellow oil.  $^1\text{H-NMR}$  ( $\text{CDCl}_3$ , 300 MHz, ppm):  $\delta$  = 7.37-7.33 (m, 1 H), 7.16-7.08 (m, 5 H), 6.87 (d,  $J$  = 5.7 Hz, 1 H), 6.34 (t,  $J$  = 7.5 Hz, 1 H), 5.01 (s, 1 H), 2.33 (s, 3 H), 2.04 (dq,  $J_1$  = 7.5 Hz,  $J_2$  = 7.5 Hz, 2 H), 1.03 (t,  $J$  = 7.5 Hz, 3 H);  $^{13}\text{C-NMR}$  ( $\text{CDCl}_3$ , 75 MHz, ppm):  $\delta$  = 152.9, 138.1, 137.9, 134.9, 133.0, 132.0, 129.6, 129.5, 129.2, 126.5, 117.3, 112.3, 23.4, 21.2, 14.1; IR (KBr,  $\text{cm}^{-1}$ ):  $\nu$  = 3516, 2965, 2871, 1569, 1476, 1412, 1325, 1264, 1195, 1074, 941, 817, 720, 611; HRMS calc.  $\text{C}_{17}\text{H}_{17}\text{BrO}$  ( $\text{M}^+$ ): 316.0463. Found: 316.0469.

**(E)-2-(pent-2-en-2-yl)phenol (2j)**

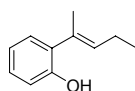

The title compound was a yellow oil.  $^1\text{H-NMR}$  ( $\text{CDCl}_3$ , 300 MHz, ppm):  $\delta$  = 7.18-7.07 (m, 2 H), 6.93-6.88 (m, 2 H), 5.64-5.52 (m, 2 H), 2.24 (dq,  $J_1$  = 7.5 Hz,  $J_2$  = 7.5 Hz, 2 H), 1.99 (s, 3 H), 1.07 (t,  $J$  = 7.5 Hz, 3 H);  $^{13}\text{C-NMR}$  ( $\text{CDCl}_3$ , 75 MHz, ppm):  $\delta$  = 152.0, 133.5, 131.6, 131.1, 128.4, 128.2, 120.3, 115.4, 21.9, 17.9, 14.2; IR (KBr,  $\text{cm}^{-1}$ ):  $\nu$  = 3512, 2965, 2873, 1578, 1487, 1448, 1340, 1282, 1222, 1182, 1037, 909, 828, 753; GC-MS (EI) calc.  $\text{C}_{11}\text{H}_{14}\text{O}$  ( $\text{M}^+$ ): 162. Found: 162.

**(E)-4-methoxy-2-(pent-2-en-2-yl)phenol (2k)**

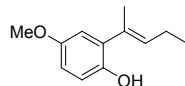

The title compound was a yellow oil.  $^1\text{H-NMR}$  ( $\text{CDCl}_3$ , 300 MHz, ppm):  $\delta$  = 6.86-6.82 (m, 1 H), 6.75-6.71 (m, 1 H), 6.58 (d,  $J$  = 7.5 Hz, 1 H), 5.69 (t,  $J$  = 7.5 Hz, 1 H), 4.83 (s, 1 H), 3.76 (s, 3 H), 1.97 (s, 3 H), 1.85 (dq,  $J_1$  = 7.5 Hz,  $J_2$  = 7.5 Hz, 2 H), 0.92 (t,  $J$  = 7.5 Hz, 3 H);  $^{13}\text{C-NMR}$  ( $\text{CDCl}_3$ , 75 MHz, ppm):  $\delta$  = 145.7, 133.4, 130.8, 115.5, 113.9, 113.8, 113.2, 112.4, 55.9, 25.1, 22.7, 14.2; IR (KBr,  $\text{cm}^{-1}$ ):  $\nu$  = 3450, 2962, 2873, 1589, 1493, 1423, 1364, 1275, 1218, 1165, 1040, 856, 810, 762; GC-MS (EI) calc.  $\text{C}_{12}\text{H}_{16}\text{O}_2$  ( $\text{M}^+$ ): 192. Found: 192.

**(E)-4-bromo-2-(pent-2-en-2-yl)phenol compound with (Z)-4-bromo-2-(pent-2-en-2-yl)phenol (17:20) (2l)**

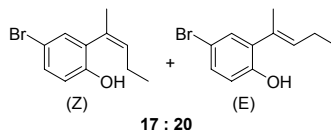

The title mixture was a yellow oil (with a trace of byproducts from NMR).  $^1\text{H-NMR}$  ( $\text{CDCl}_3$ , 300 MHz, ppm):  $\delta$  = 7.27-7.14 (m, 2 H), 6.82-6.77 (m, 1 H), 5.22 (m, 0.38 H), 5.63 (s, 0.5 H), 5.55 (m, 0.51 H), 5.26 (s, 0.5 H), 2.28-2.18 (m, 1.11 H), 1.96 (s, 3 H), 1.88-1.80 (m, 0.95 H), 1.06 (t,  $J$  = 7.5 Hz, 1.64 H), 0.93 (t,  $J$  = 7.5 Hz, 1.19 H);  $^{13}\text{C-NMR}$  ( $\text{CDCl}_3$ , 75 MHz, ppm):  $\delta$  = 151.5, 134.1, 134.0, 131.0, 130.8, 130.6, 117.0, 116.6, 24.7, 22.4, 21.6, 20.9, 14.0, 13.8; IR (KBr,  $\text{cm}^{-1}$ ):  $\nu$  = 3511, 2965, 2874, 1594, 1481, 1403, 1376, 1265, 1210, 1175, 1044, 909, 816, 759, 734;

GC-MS(EI): two peaks and both are 240.

**(E)-2,4-di-tert-butyl-6-(pent-2-en-2-yl)phenol (2m)**

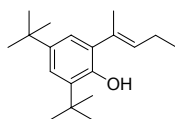

The title compound was a yellow oil.  $^1\text{H-NMR}$  ( $\text{CDCl}_3$ , 300 MHz, ppm):  $\delta = 7.19$  (d,  $J = 2.7$  Hz, 1 H), 6.93 (d,  $J = 2.7$  Hz, 1 H), 5.80 (s, 1 H), 5.05 (t,  $J = 7.5$  Hz, 1 H), 2.23 (dq,  $J_1 = 7.5$  Hz,  $J_2 = 7.5$  Hz, 2 H), 2.00 (s, 3 H), 1.07 (t,  $J = 7.5$  Hz, 3 H);  $^{13}\text{C-NMR}$  ( $\text{CDCl}_3$ , 75 MHz, ppm):  $\delta = 148.1$ , 141.5, 135.0, 133.8, 133.5, 132.4, 122.6, 115.4, 35.3, 34.4, 31.8, 29.8, 21.9, 18.5, 14.2; IR (KBr,  $\text{cm}^{-1}$ ):  $\nu = 3506$ , 2961, 2872, 1600, 1489, 1442, 1362, 1264, 1201, 1168, 1119, 1032, 909, 878, 817, 767, 648; HRMS calc.  $\text{C}_{19}\text{H}_{30}\text{O}$  ( $\text{M}^+$ ): 274.2297. Found: 274.2295.

**(E)-2-(but-1-enyl)phenol (2n)**

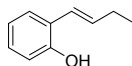

The title compound was a yellow oil.  $^1\text{H-NMR}$  ( $\text{CDCl}_3$ , 300 MHz, ppm):  $\delta = 7.30$  (d,  $J = 7.5$  Hz, 1 H), 7.10-7.05 (m, 1 H), 6.89-6.84 (m, 1 H), 6.77 (d,  $J = 8.1$  Hz, 1 H), 6.55 (d,  $J = 15.9$  Hz, 1 H), 6.28-6.19 (m, 1 H), 5.10 (s, 1 H), 2.27-2.22 (m, 2 H), 1.09 (t,  $J = 7.5$  Hz, 3 H);  $^{13}\text{C-NMR}$  ( $\text{CDCl}_3$ , 75 MHz, ppm):  $\delta = 153.0$ , 135.3, 128.1, 127.9, 127.5, 123.2, 121.0, 115.8, 26.6, 13.8; IR (KBr,  $\text{cm}^{-1}$ ):  $\nu = 3424$ , 2964, 2872, 1605, 1486, 1455, 1331, 1242, 1132, 1087, 971, 908, 879, 798, 750; GC-MS (EI) calc.  $\text{C}_{10}\text{H}_{12}\text{O}$  ( $\text{M}^+$ ): 148. Found: 148.

**(E)-4-bromo-2-(but-1-enyl)phenol (2o)**

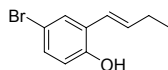

The title compound was a yellow oil.  $^1\text{H-NMR}$  ( $\text{CDCl}_3$ , 300 MHz, ppm):  $\delta = 8.13$  (s, 1 H), 7.27-7.24 (m, 1 H), 7.04-7.03 (m, 1 H), 6.74 (d,  $J = 8.4$  Hz, 1 H), 5.82-5.64 (m, 1 H), 5.09 (s, 1 H), 3.58-3.51 (m, 2 H), 1.24 (t,  $J = 6.9$  Hz, 3 H);  $^{13}\text{C-NMR}$  ( $\text{CDCl}_3$ , 75 MHz, ppm):  $\delta = 155.1$ , 133.7, 131.8, 130.8, 130.3, 118.9, 118.0, 111.7, 40.5, 13.9; IR (KBr,  $\text{cm}^{-1}$ ):  $\nu = 3339$ , 2976, 2876, 1578, 1481, 1370, 1246, 1167, 1075, 993, 912, 819, 734; HRMS calc.  $\text{C}_{10}\text{H}_{11}\text{BrO}$  ( $\text{M}^+$ ): 225.9993. Found: 225.9988.

**(E)-2-(but-1-enyl)-4,6-di-tert-butylphenol (2p)**

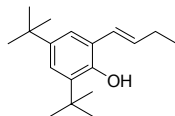

The title compound was a yellow oil.  $^1\text{H-NMR}$  ( $\text{CDCl}_3$ , 300 MHz, ppm):  $\delta = 7.25$  (d,  $J = 2.4$  Hz, 1 H), 7.11 (d,  $J = 2.4$  Hz, 1 H), 6.50 (d,  $J = 15.9$  Hz, 1 H), 6.22-6.11 (m, 1 H), 5.25 (s, 1 H), 2.36-2.25 (m, 2 H), 1.46 (s, 9 H), 1.34 (s, 9 H), 1.16 (t,  $J = 7.5$  Hz, 3 H);  $^{13}\text{C-NMR}$  ( $\text{CDCl}_3$ , 75 MHz, ppm):  $\delta = 150.0$ , 142.1, 137.3, 129.5, 124.0, 123.2, 122.8, 121.9, 31.7, 30.2, 30.0, 29.8, 26.6, 13.8; IR (KBr,  $\text{cm}^{-1}$ ):  $\nu = 3355$ , 2960, 1599, 1468, 1368, 1217, 1061, 980, 910, 824, 737; HRMS calc.  $\text{C}_{18}\text{H}_{28}\text{O}$  ( $\text{M}^+$ ): 260.2140. Found: 260.2146.

**Deuterium (E)-2-(1-phenylbut-1-enyl)phenol (2a-d)**

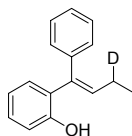

The title compound was a yellow oil.  $^1\text{H-NMR}$  ( $\text{CDCl}_3$ , 300 MHz, ppm):  $\delta$  = 7.28-7.23 (m, 6 H), 7.02-6.94 (m, 3 H), 6.37 (t,  $J$  = 7.5 Hz, 1 H), 5.02 (s, 1 H), 2.05 (dq,  $J_1$  = 7.5 Hz,  $J_2$  = 7.5 Hz, 1 H), 1.03 (t,  $J$  = 7.5 Hz, 3 H);  $^{13}\text{C-NMR}$  ( $\text{CDCl}_3$ , 75 MHz, ppm):  $\delta$  = 153.1, 140.5, 135.2, 135.1, 130.8, 129.3, 128.7, 127.7, 126.6, 125.8, 120.7, 115.5, 23.5, 14.2; IR (KBr,  $\text{cm}^{-1}$ ):  $\nu$  = 3524, 2966, 2872, 1580, 1486, 1449, 1334, 1284, 1193, 1148, 1033, 910, 838, 755, 698; HRMS calc.  $\text{C}_{16}\text{H}_{15}\text{DO}$  ( $\text{M}^+$ ): 225.1264. Found: 225.1258.

**(E)-3-(1-phenylbut-2-enyl)phenol (3d)**

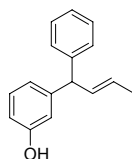

The title compound was a yellow oil.  $^1\text{H-NMR}$  ( $\text{CDCl}_3$ , 300 MHz, ppm):  $\delta$  = 7.30-7.10 (m, 6 H), 6.75 (d,  $J$  = 7.5 Hz, 7.5 Hz, 1 H), 6.65 (d,  $J$  = 6.3 Hz, 2 H), 5.92-5.84 (m, 1 H), 5.45-5.40 (m, 1 H), 5.19 (s, 1 H), 4.60 (d,  $J$  = 7.5 Hz, 1 H), 1.71 (d,  $J$  = 3.9 Hz, 3 H);  $^{13}\text{C-NMR}$  ( $\text{CDCl}_3$ , 75 MHz, ppm):  $\delta$  = 155.6, 146.2, 140.1, 132.9, 129.6, 128.6, 128.4, 127.1, 126.3, 121.0, 115.6, 113.2, 54.0, 18.0; IR (KBr,  $\text{cm}^{-1}$ ):  $\nu$  = 3398, 3025, 1596, 1491, 1450, 1364, 1262, 1150, 1030, 970, 873, 779, 699; HRMS calc.  $\text{C}_{16}\text{H}_{16}\text{O}$  ( $\text{M}^+$ ): 224.1201. Found: 224.1208.

**2-methyl-4-phenyl-4H-chromene (4a)**

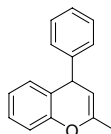

The title compound was a yellow oil.  $^1\text{H-NMR}$  ( $\text{CDCl}_3$ , 300 MHz, ppm):  $\delta$  = 7.31-7.14 (m, 5 H), 7.11-7.7.08 (m, 1 H), 6.94-6.89 (m, 2 H), 4.77 (d,  $J$  = 3.6 Hz, 1 H), 4.62 (d,  $J$  = 3.6 Hz, 1 H), 1.95 (s, 3 H);  $^{13}\text{C-NMR}$  ( $\text{CDCl}_3$ , 75 MHz, ppm):  $\delta$  = 147.3, 147.0, 129.9, 128.6, 128.3, 127.6, 126.5, 125.5, 123.2, 116.7, 116.4, 100.6, 41.0, 19.4; IR (KBr,  $\text{cm}^{-1}$ ):  $\nu$  = 3426, 3027, 2921, 1699, 1584, 1486, 1453, 1382, 1320, 1229, 1168, 1105, 1075, 938, 836, 754, 700; HRMS calc.  $\text{C}_{16}\text{H}_{14}\text{O}$  ( $\text{M}^+$ ): 222.1045. Found: 222.1047.

**2-ethyl-3-phenylbenzofuran (5a)**

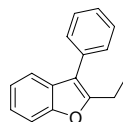

The title compound was a yellow oil.  $^1\text{H-NMR}$  ( $\text{CDCl}_3$ , 300 MHz, ppm):  $\delta$  = 7.91 (d,  $J$  = 2.5 Hz, 1 H), 7.79 (d,  $J$  = 2.5 Hz, 1 H), 7.50-7.47 (m, 3 H), 7.43-7.35 (m, 4 H), 2.90 (q,  $J$  = 7.5 Hz, 2 H), 1.37 (t,  $J$  = 7.5 Hz, 3 H);  $^{13}\text{C-NMR}$  ( $\text{CDCl}_3$ , 75 MHz, ppm):  $\delta$  = 158.0, 153.8, 139.7, 131.9, 128.9, 128.5, 127.8, 123.7, 122.7, 119.6, 116.7, 111.0, 20.4, 13.0; IR (KBr,  $\text{cm}^{-1}$ ):  $\nu$  = 3423, 3061, 2975, 1618, 1590, 1497, 1424, 1378, 1310, 1244, 1191, 1155, 1076, 984, 908, 848, 733, 700; HRMS

calc. C<sub>16</sub>H<sub>14</sub>O (M<sup>+</sup>): 222.1045. Found: 222.1055.

## 4. NMR Spectras of all compounds

### 4.1 NMR Spectras of the substrates 1a-1r

#### 1a

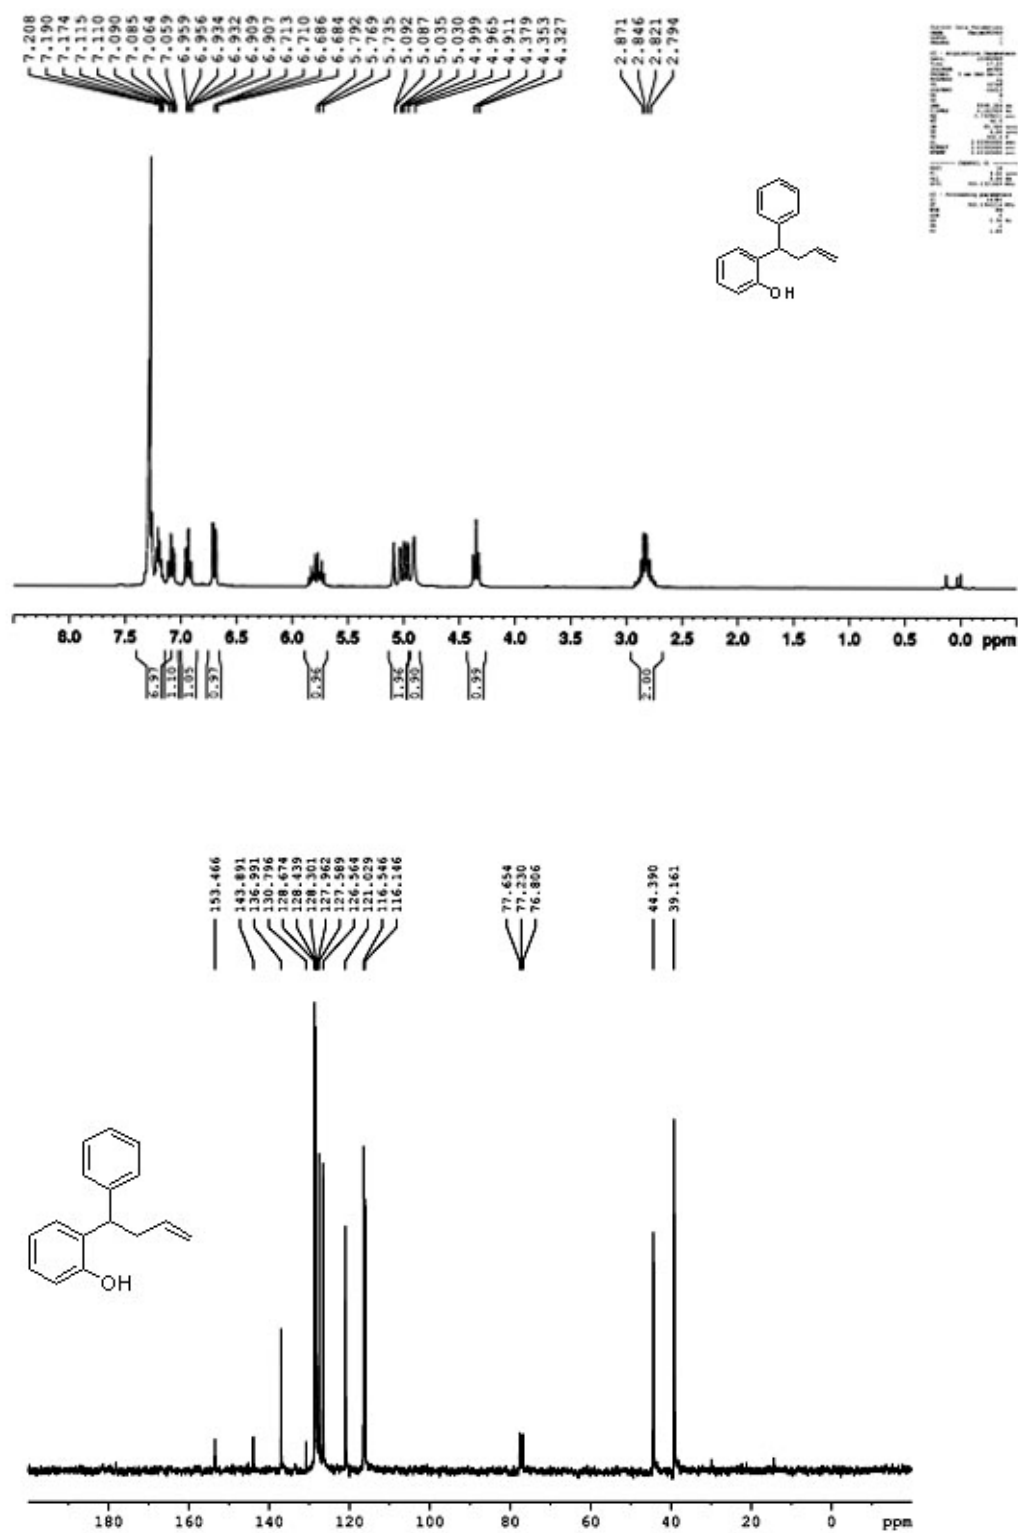

1b

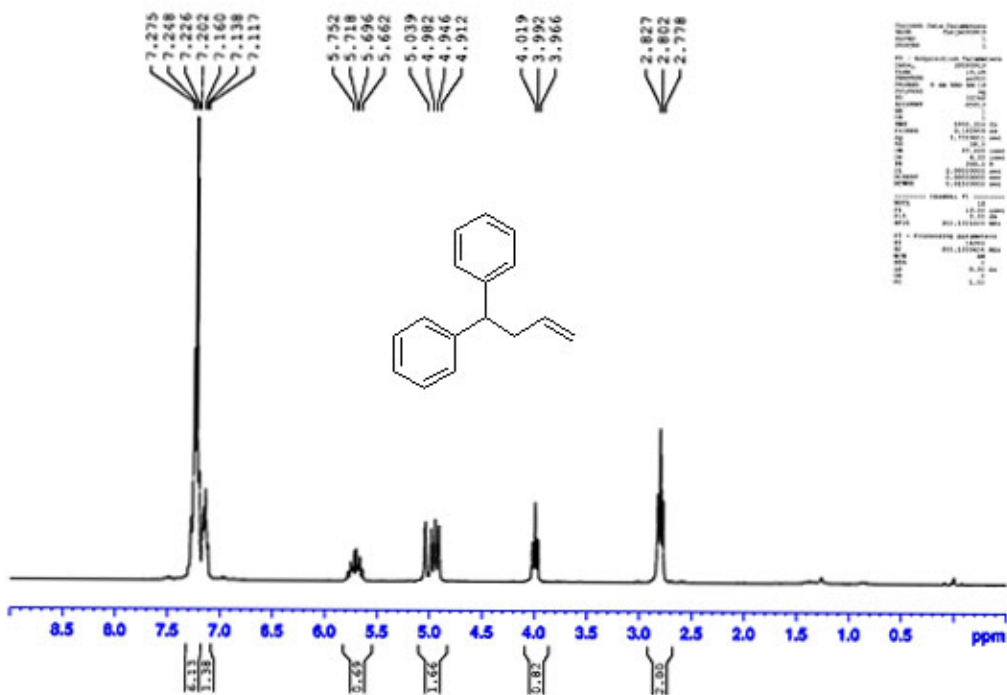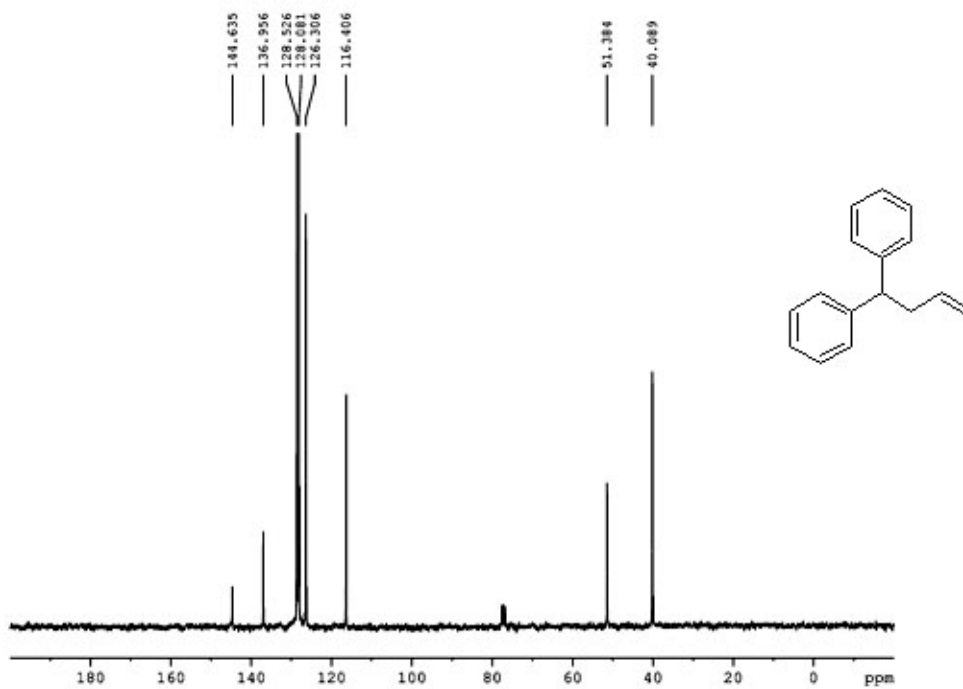

1c

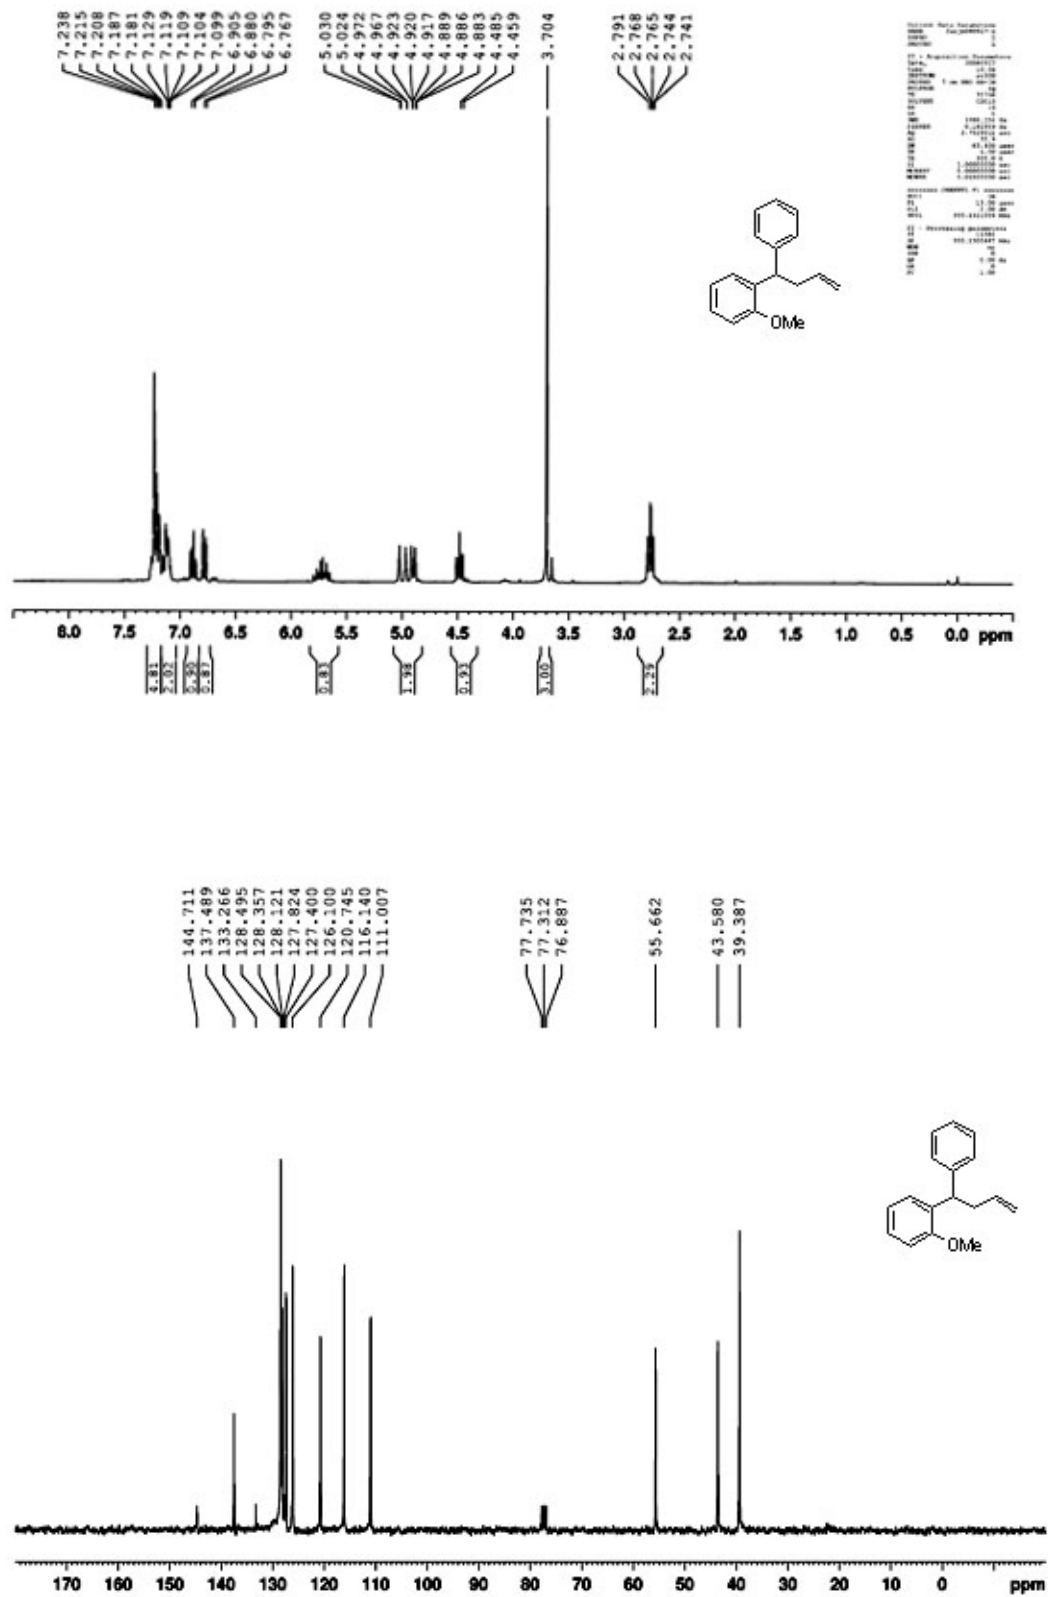



1d

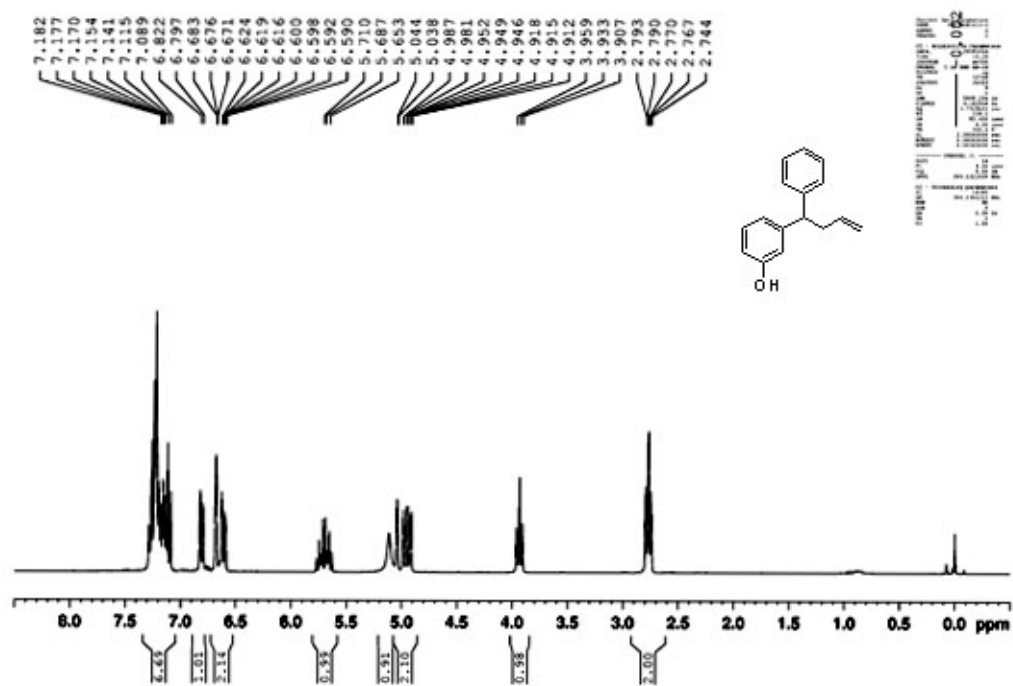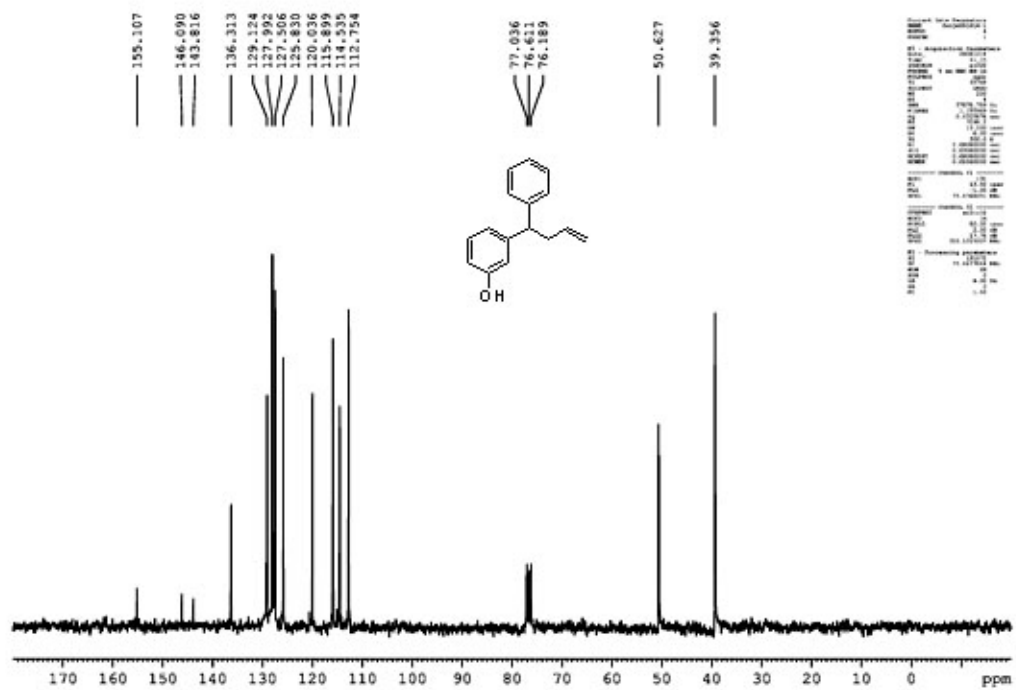

1e

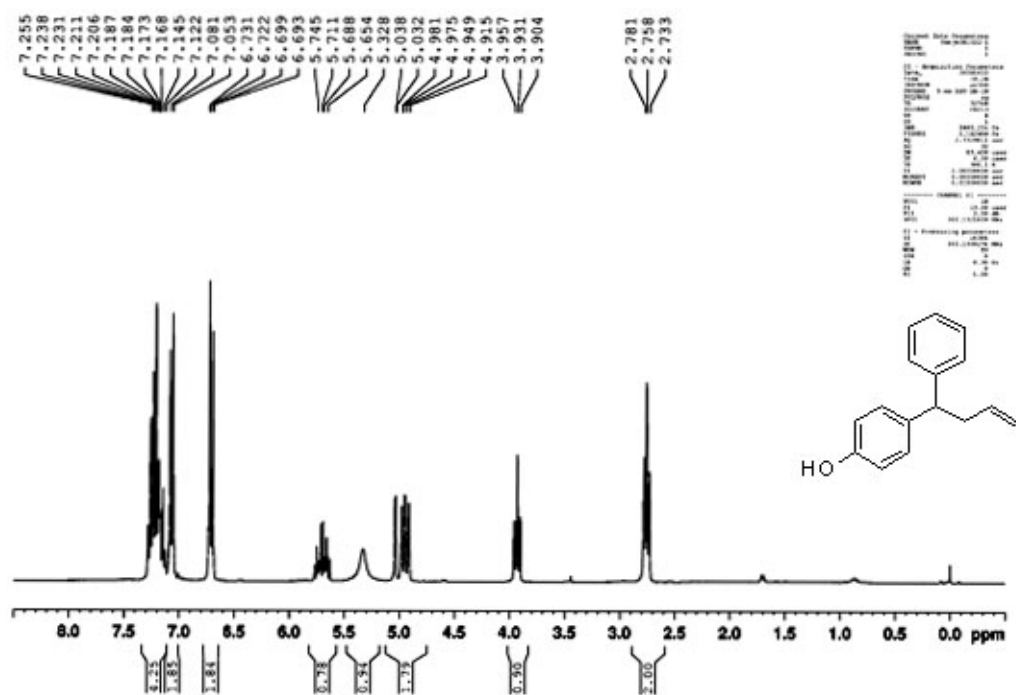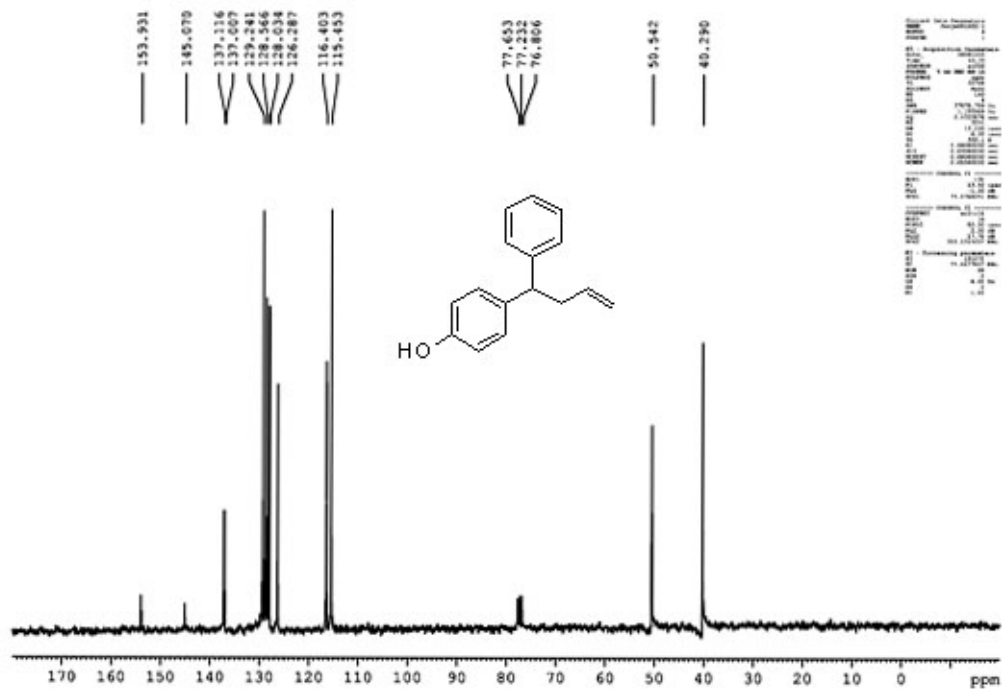

1f

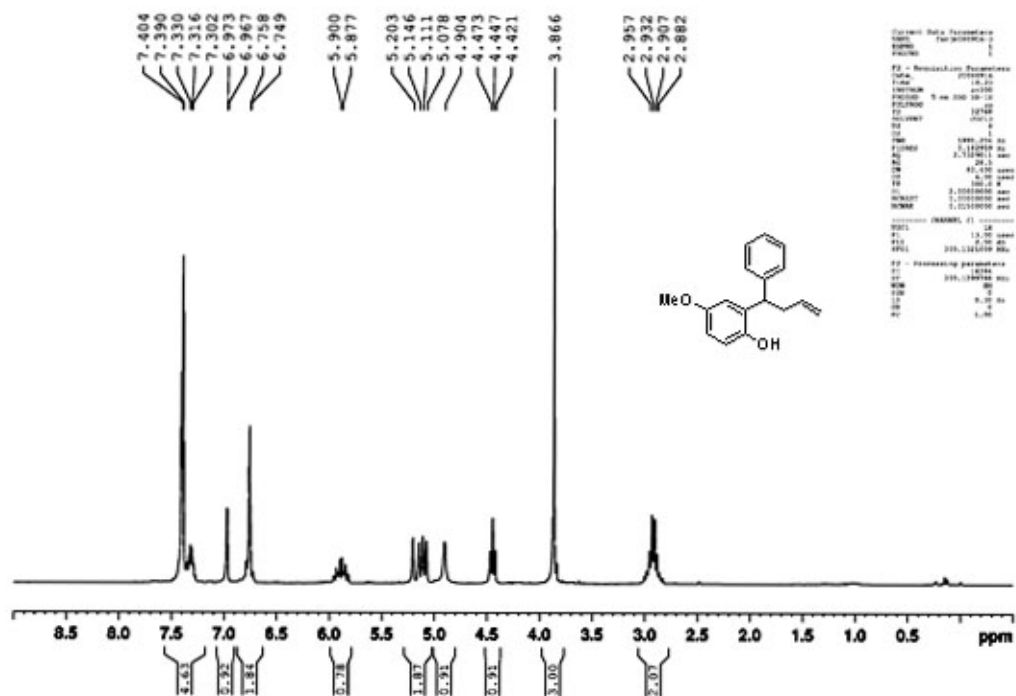

Current Date: 2009/05/20  
Name: 1f  
ExpNo: 1  
Date\_Exp: 20090520  
Time: 10.10  
Solvent: CDCl3  
PulseProg: zgpg30  
F2 - Processing parameters  
SI: 32768  
SF: 400.146  
AQ: 1.00000000  
RG: 655.36  
AQ2: 0.19230769  
RG2: 33.28125000  
SI2: 65536  
SF2: 101.62536100  
AQ3: 0.19230769  
RG3: 33.28125000  
SI3: 65536  
SF3: 101.62536100  
AQ4: 0.19230769  
RG4: 33.28125000  
SI4: 65536  
SF4: 101.62536100  
AQ5: 0.19230769  
RG5: 33.28125000  
SI5: 65536  
SF5: 101.62536100  
F2 - Processing parameters  
SI: 32768  
SF: 400.146  
AQ: 1.00000000  
RG: 655.36  
AQ2: 0.19230769  
RG2: 33.28125000  
SI2: 65536  
SF2: 101.62536100  
AQ3: 0.19230769  
RG3: 33.28125000  
SI3: 65536  
SF3: 101.62536100  
AQ4: 0.19230769  
RG4: 33.28125000  
SI4: 65536  
SF4: 101.62536100  
AQ5: 0.19230769  
RG5: 33.28125000  
SI5: 65536  
SF5: 101.62536100

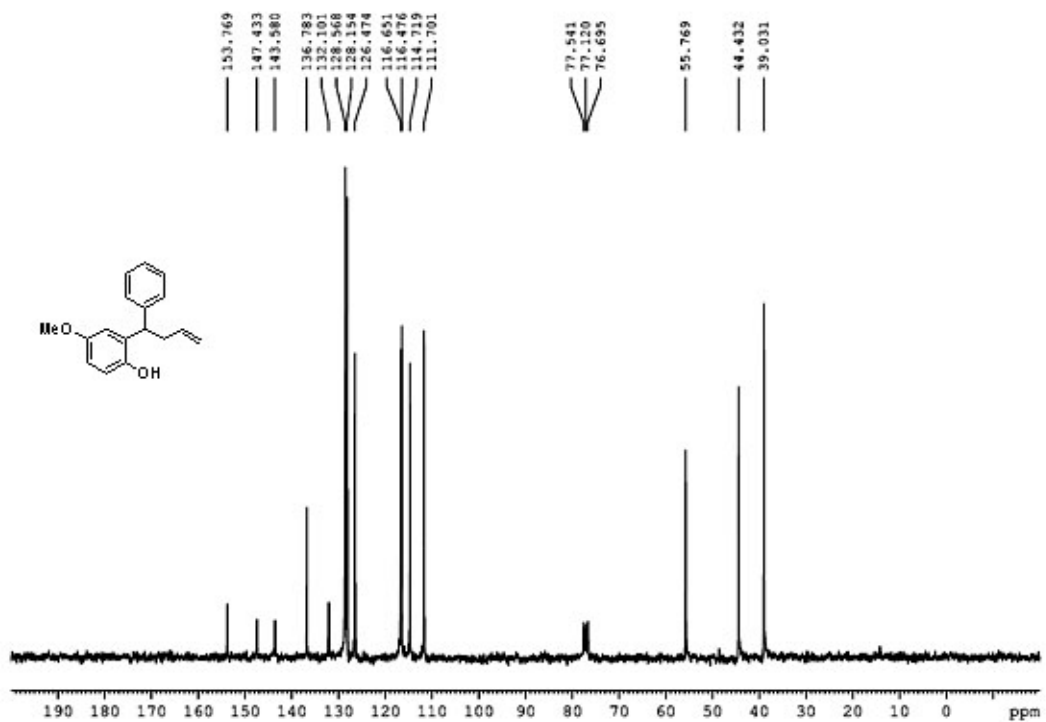

1g

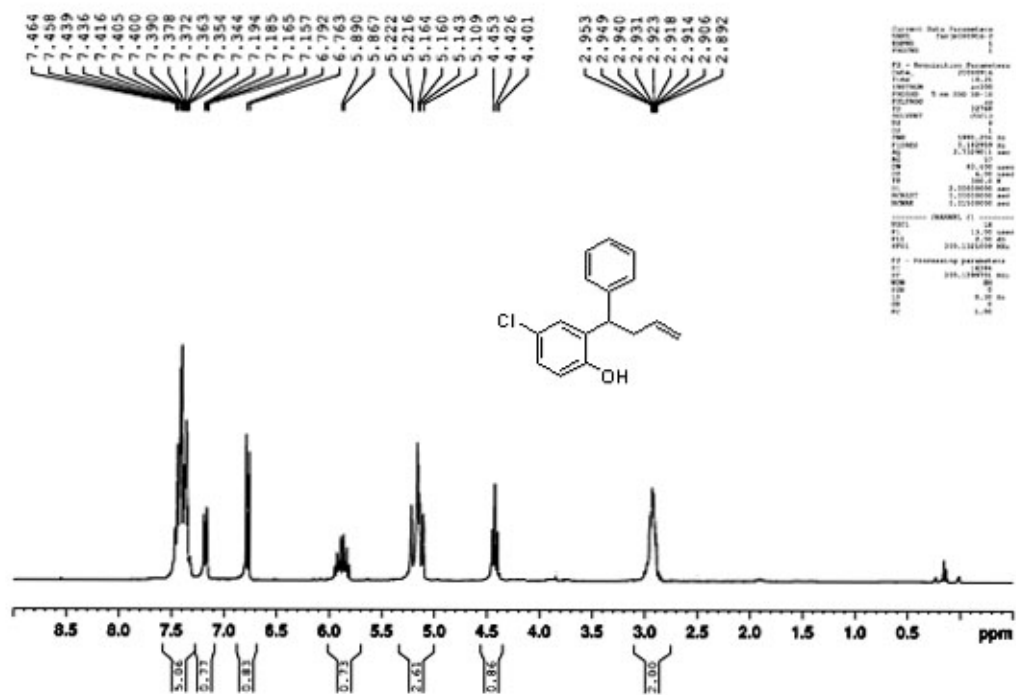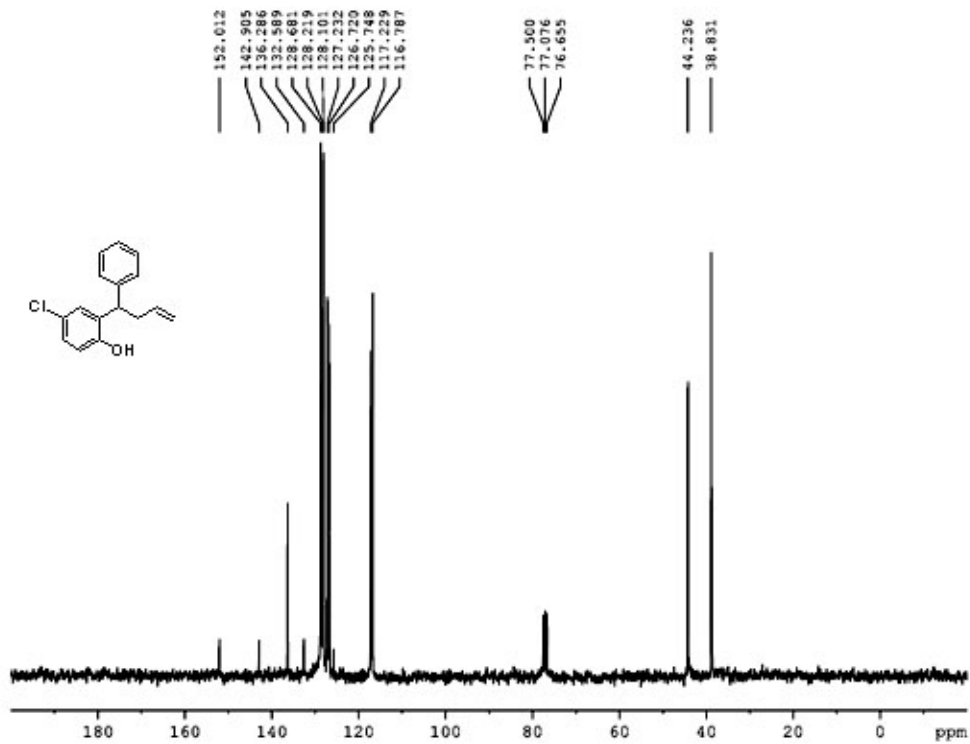

1h

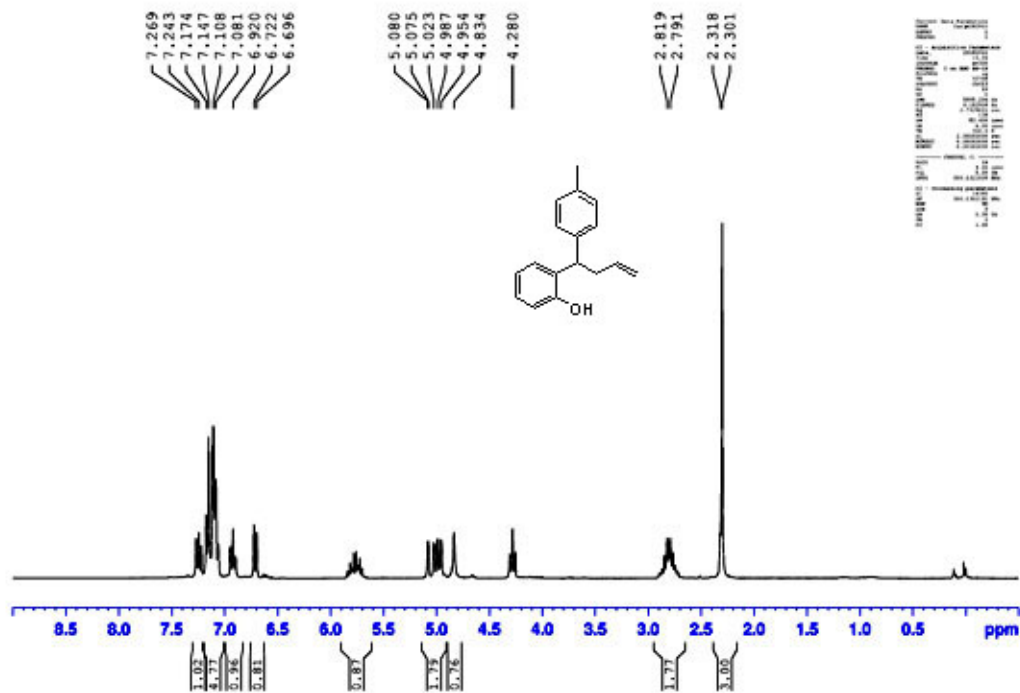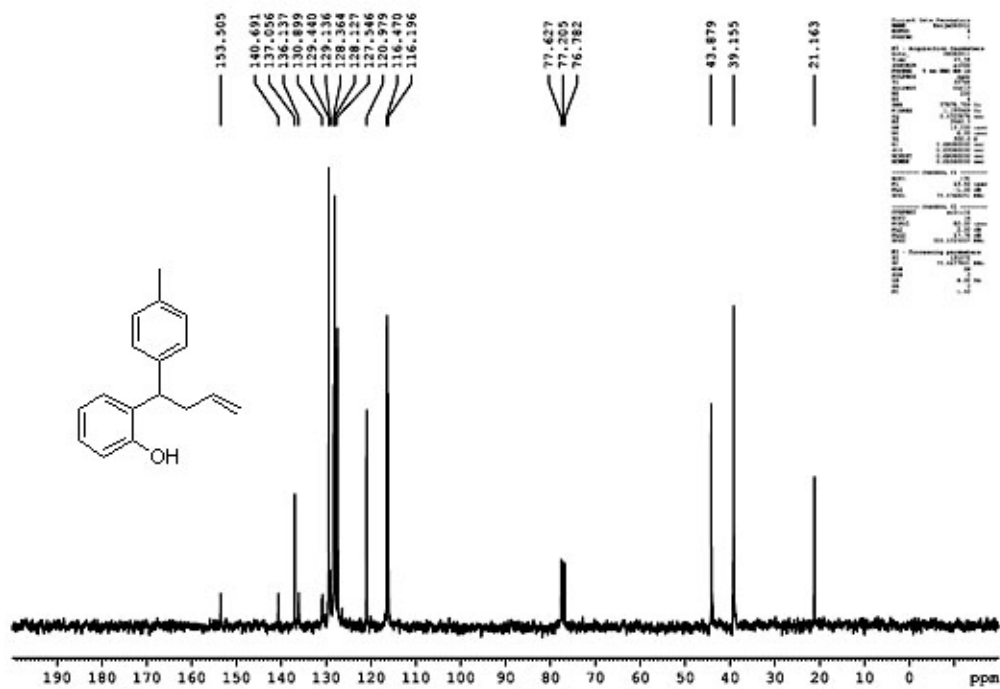

1i

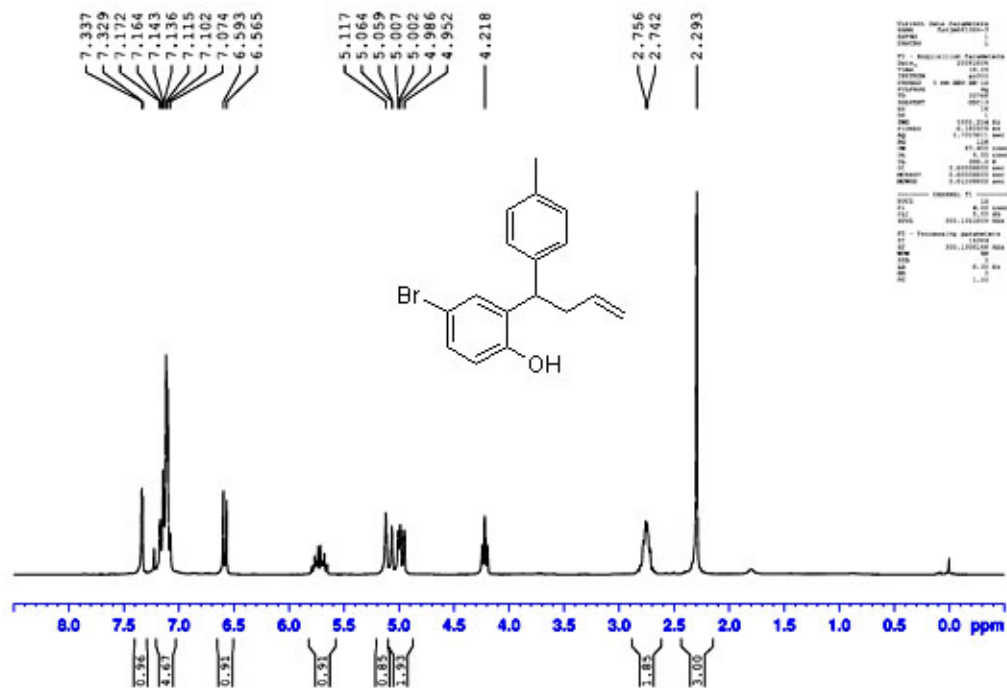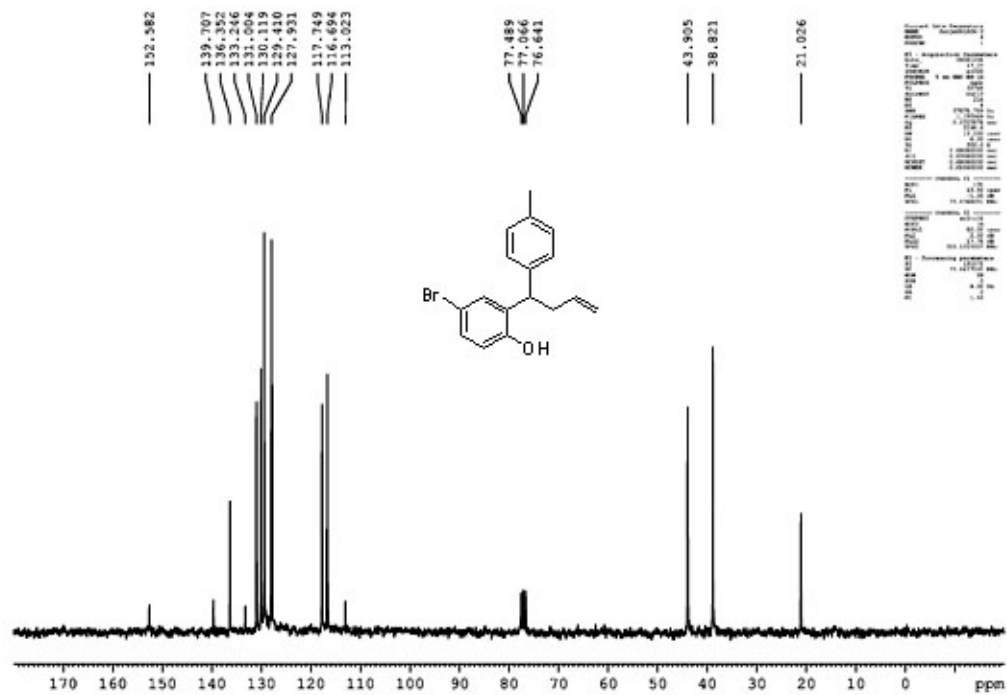

1j

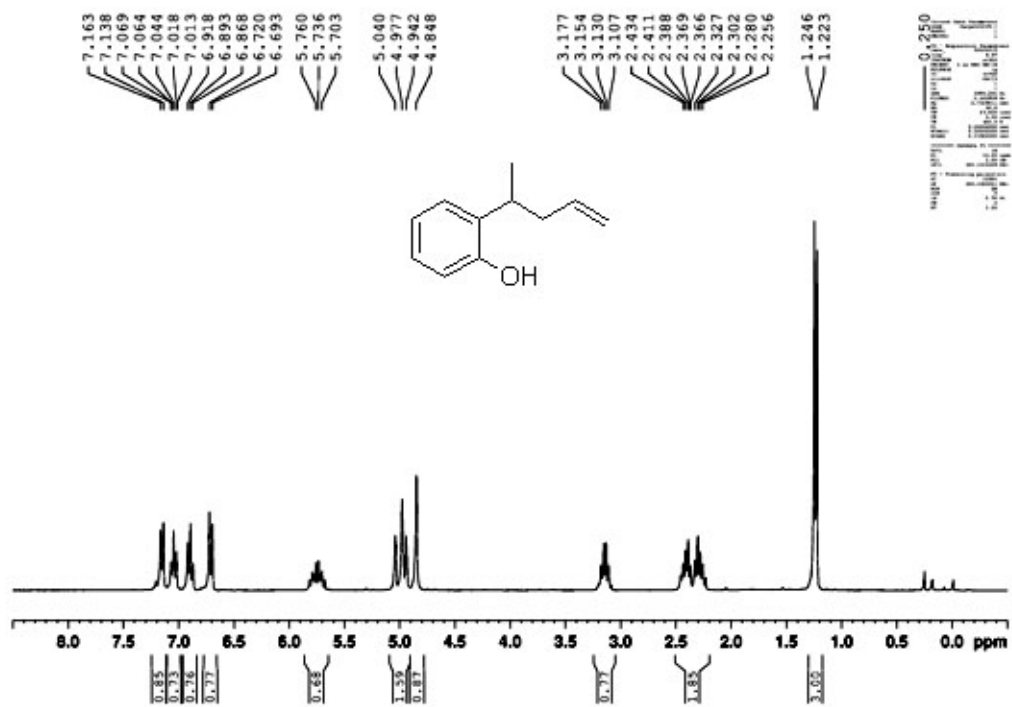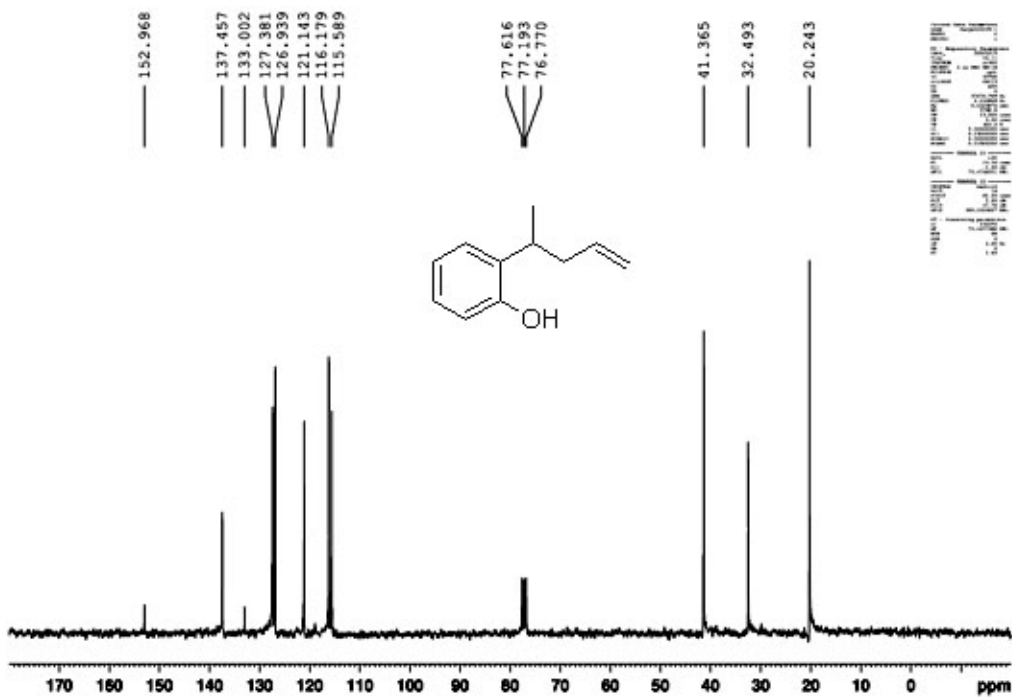

1k

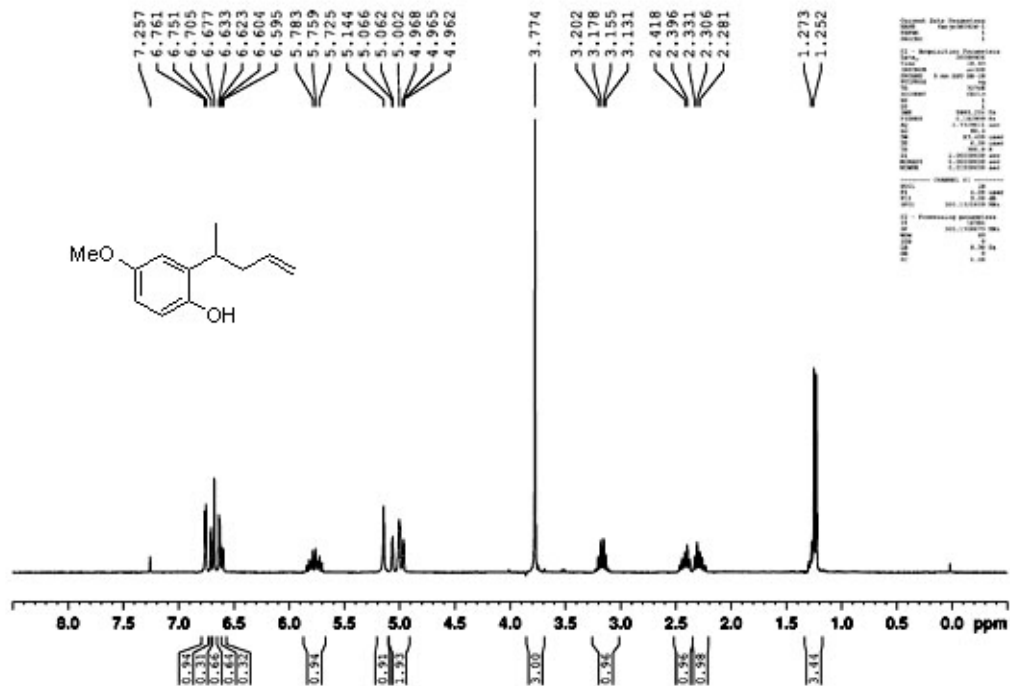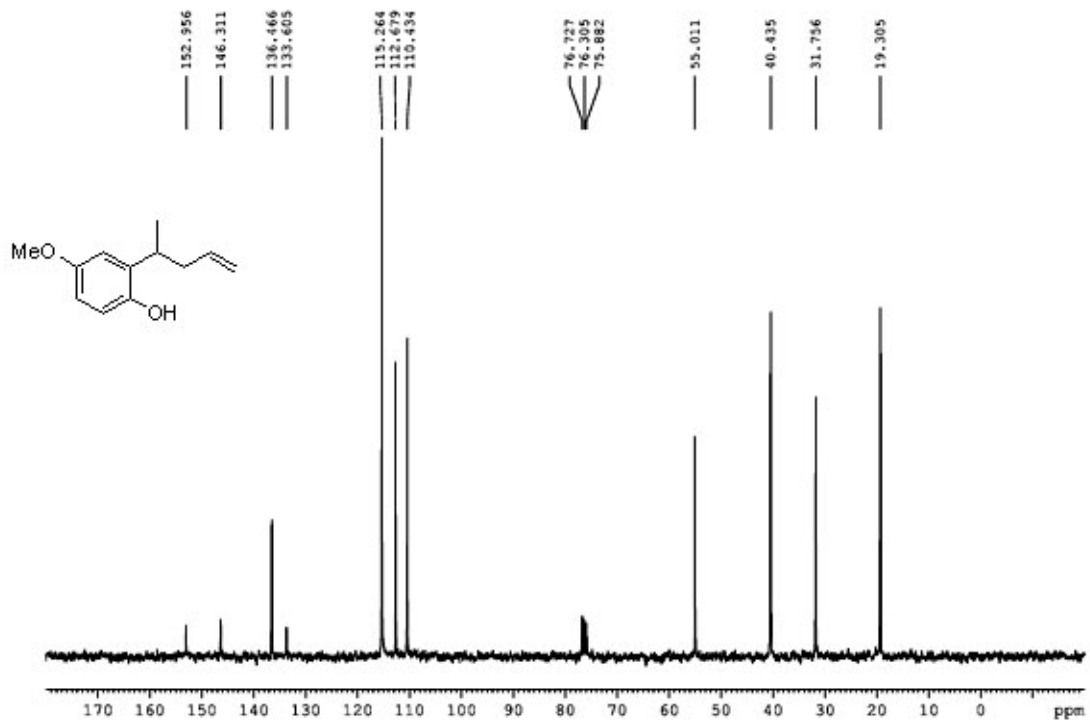



11

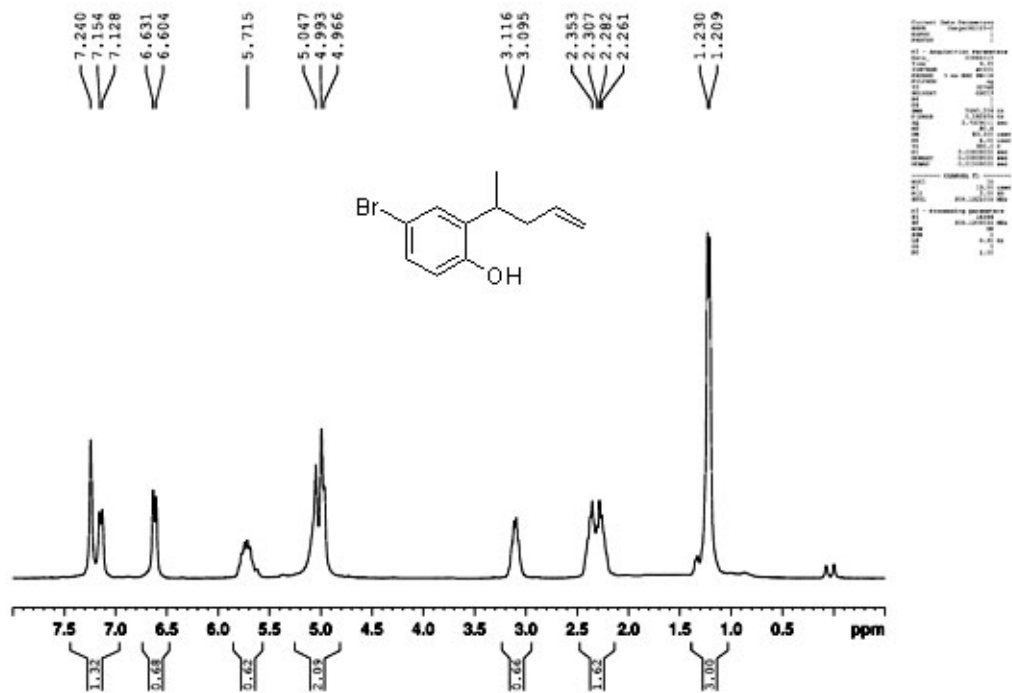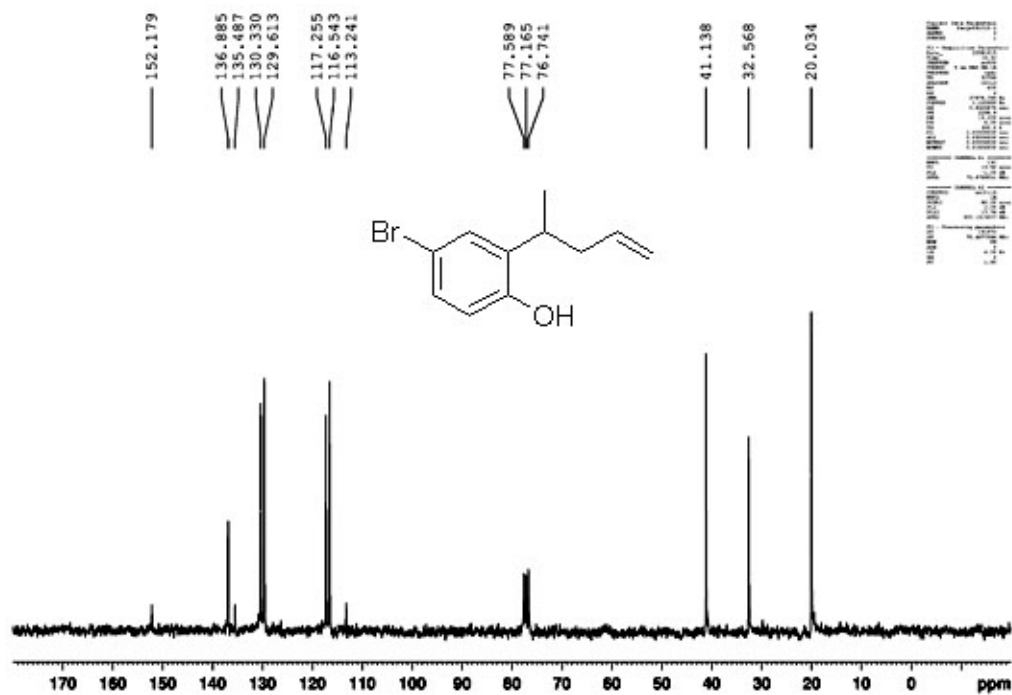

1m

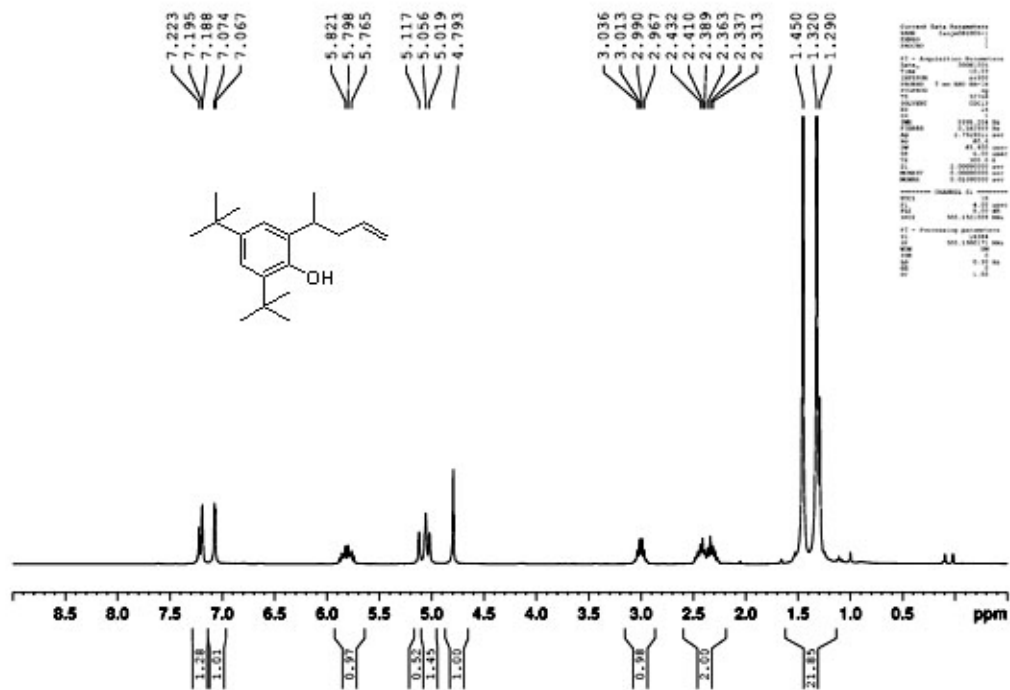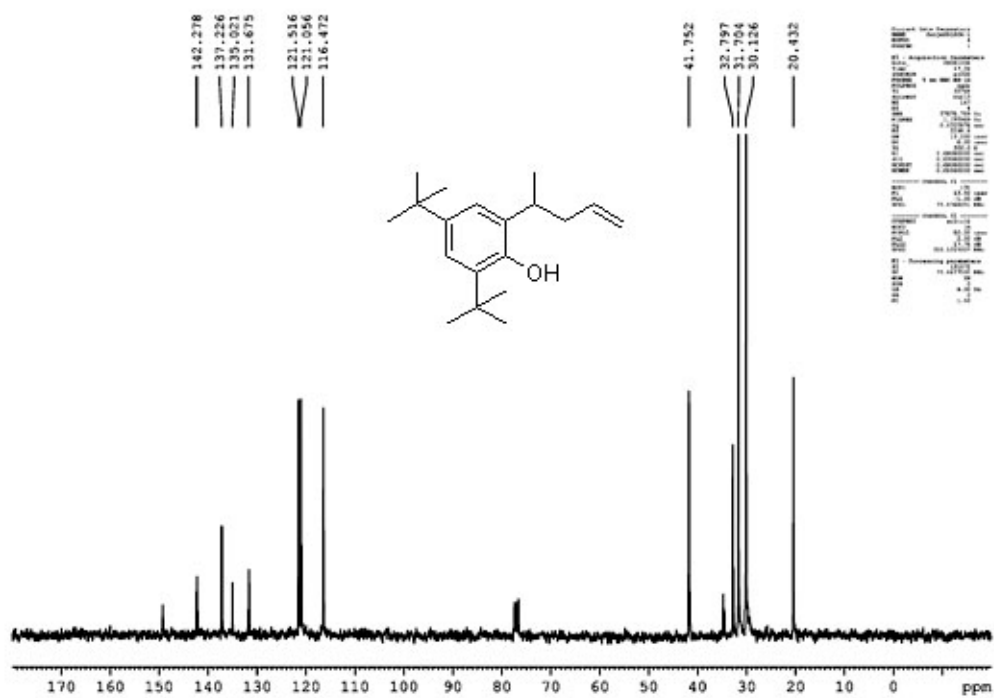

1n

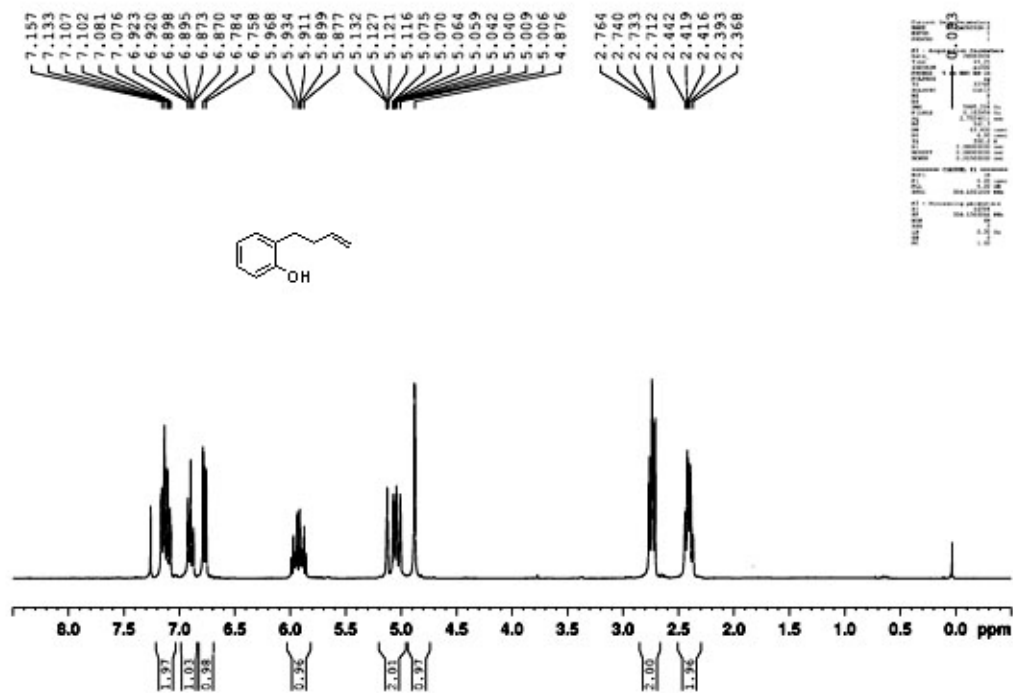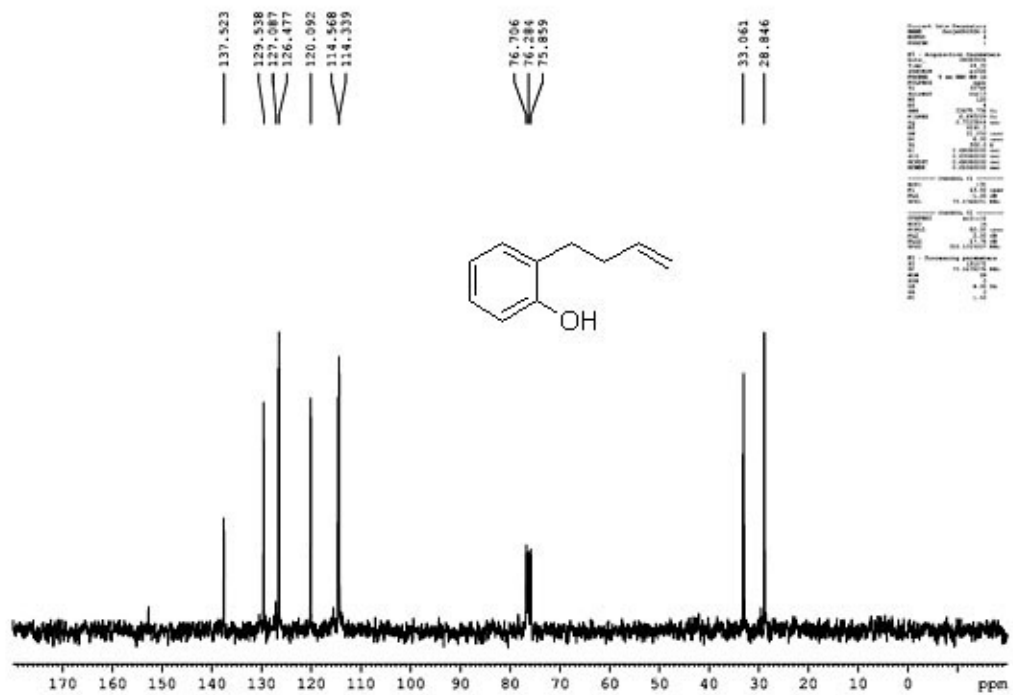

10

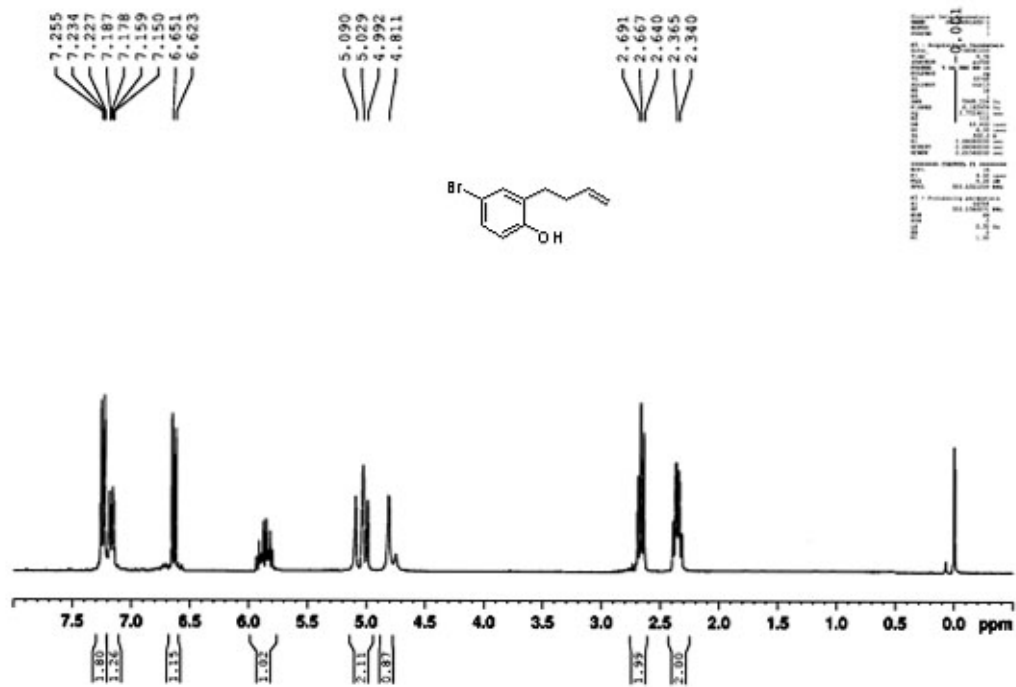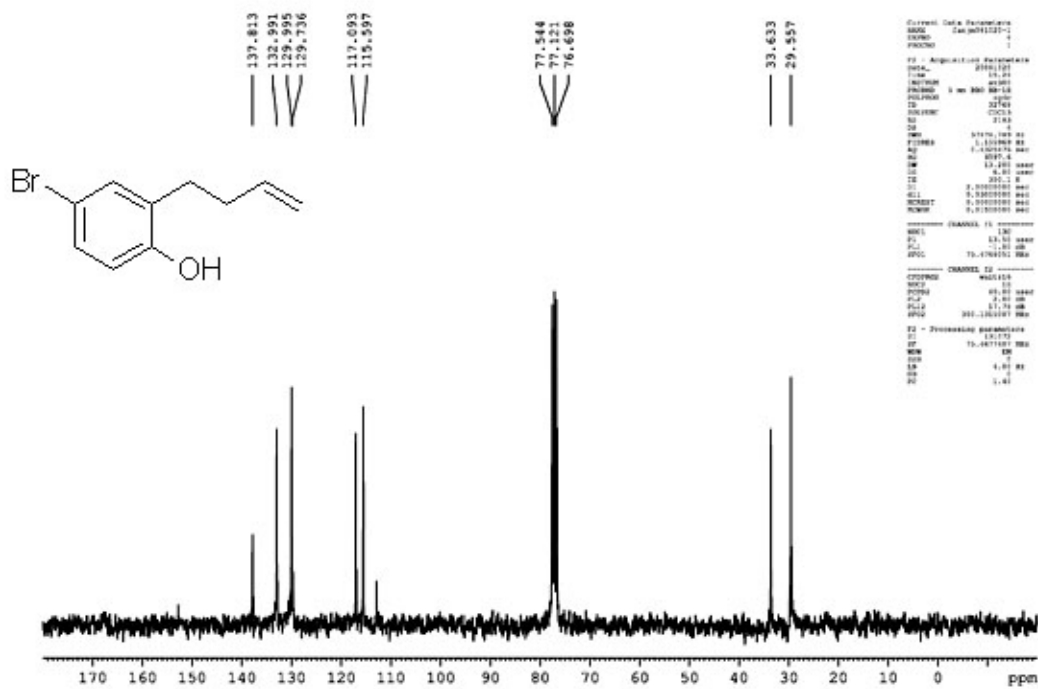

1p

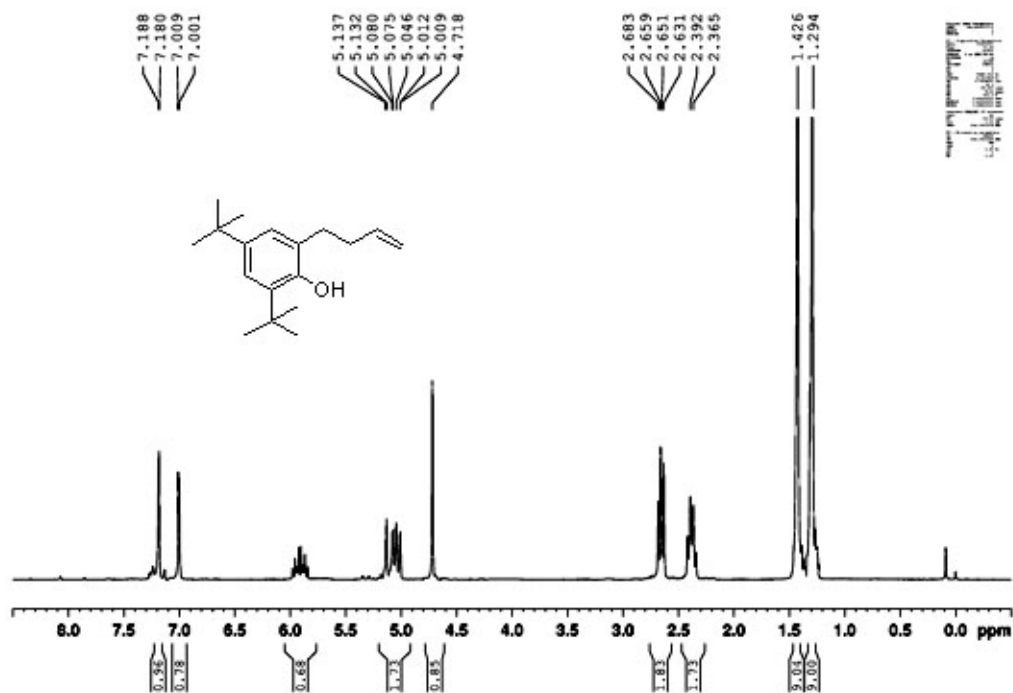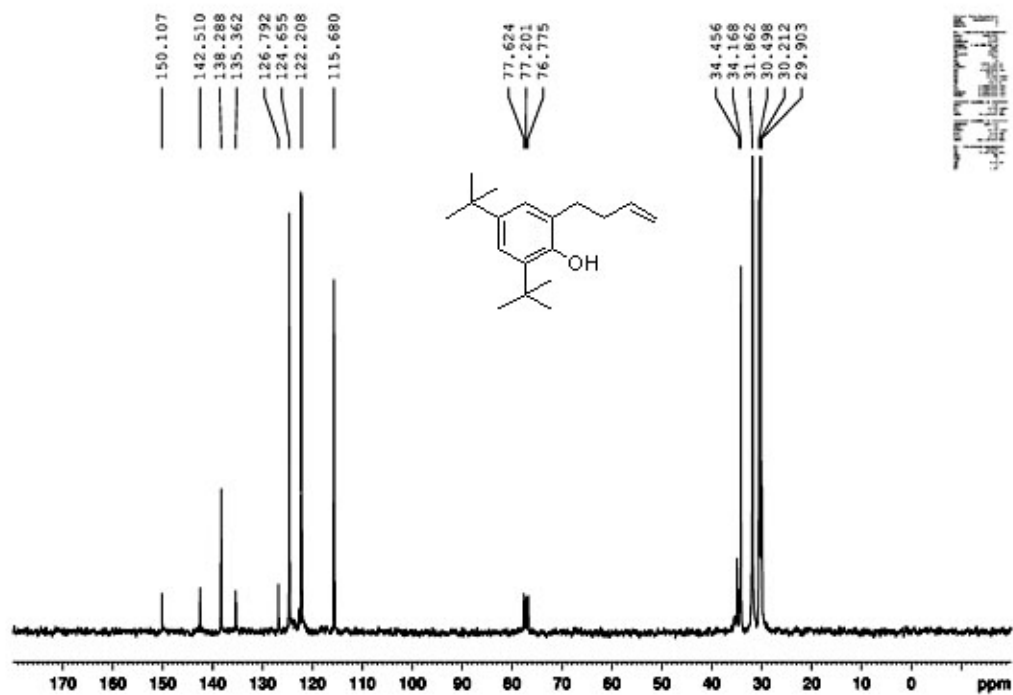

1r

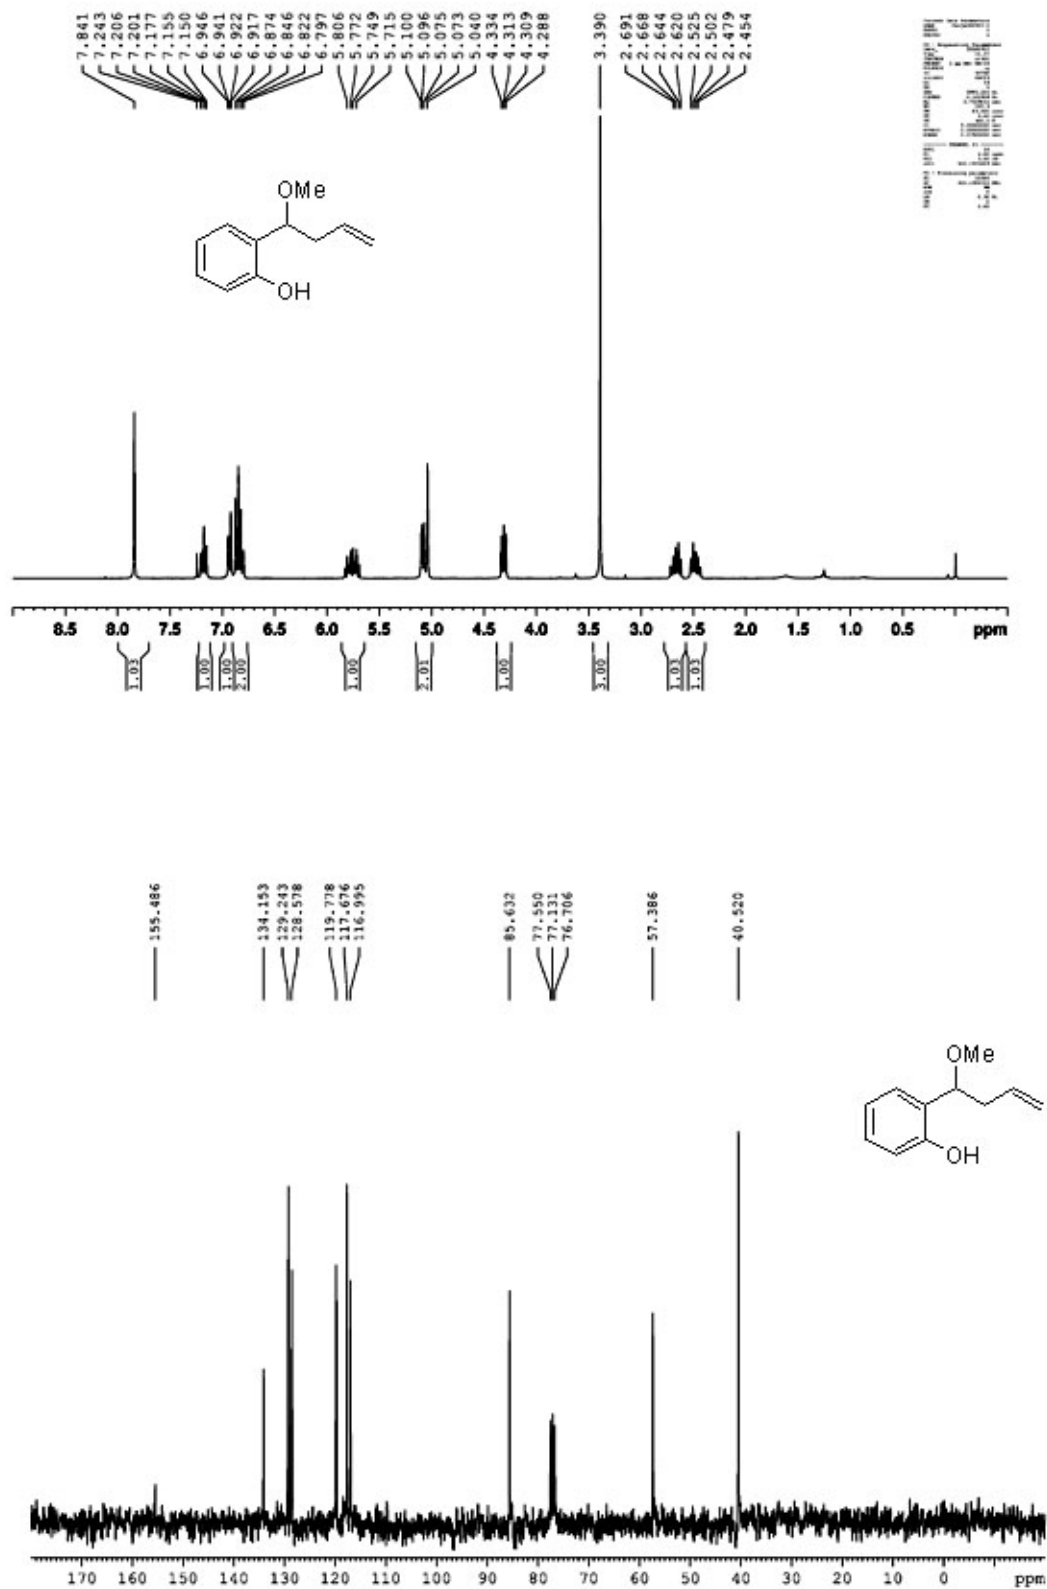

1a-d

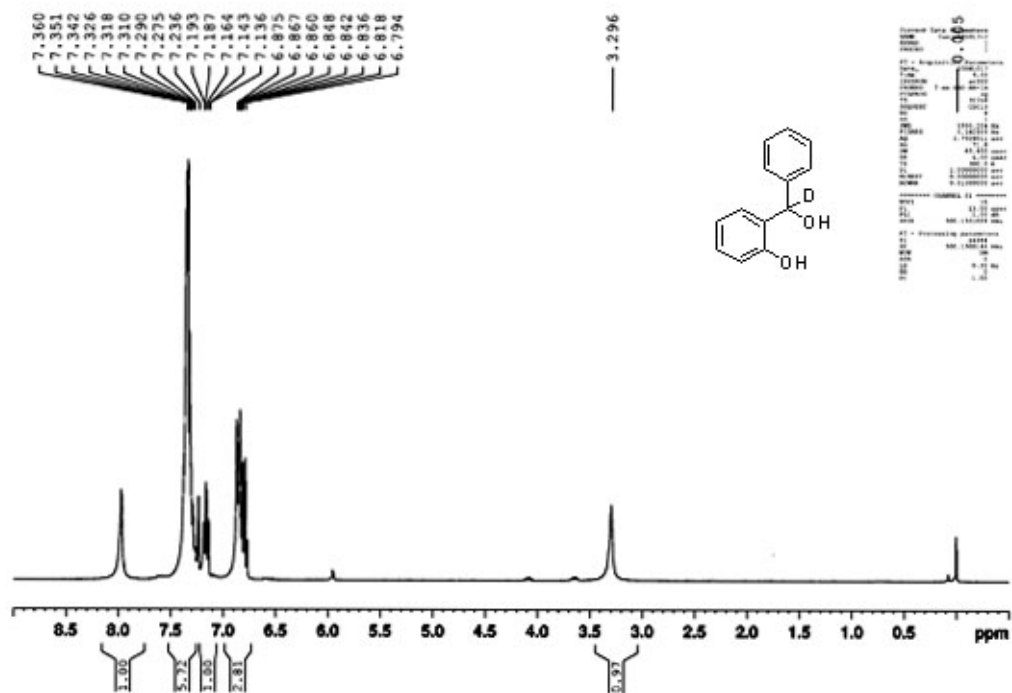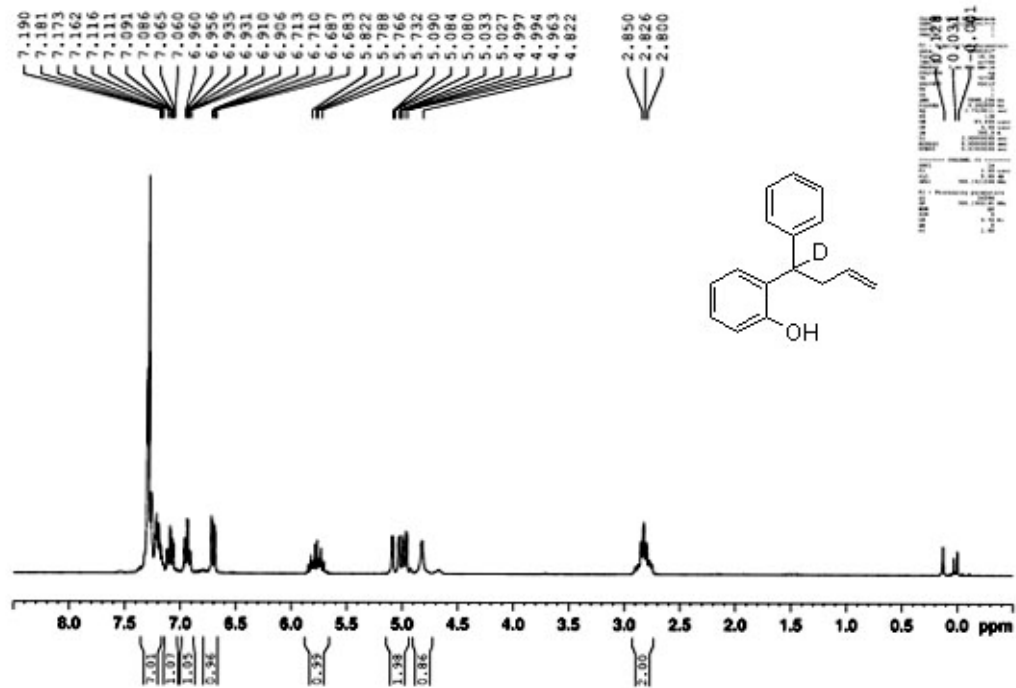

### 4.1 NMR Spectras of the products 2a, 2a-d

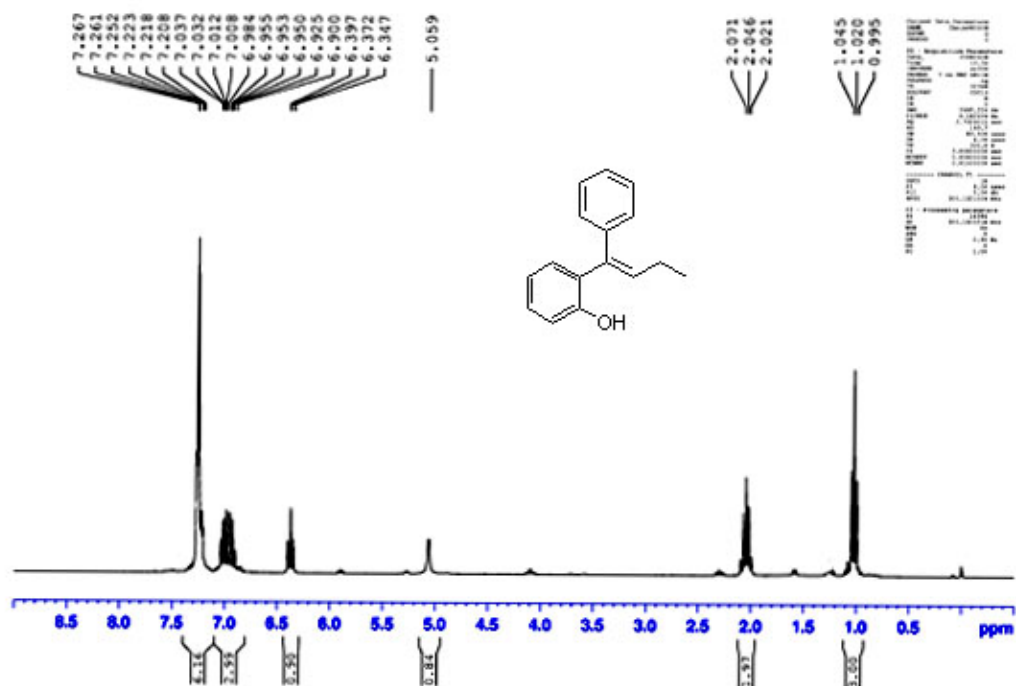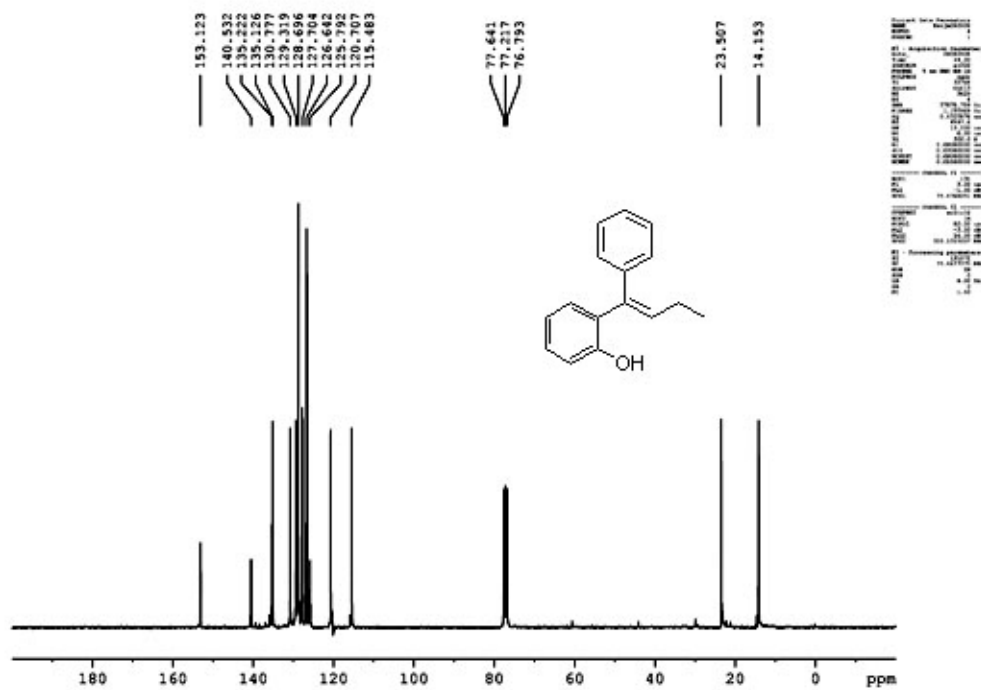



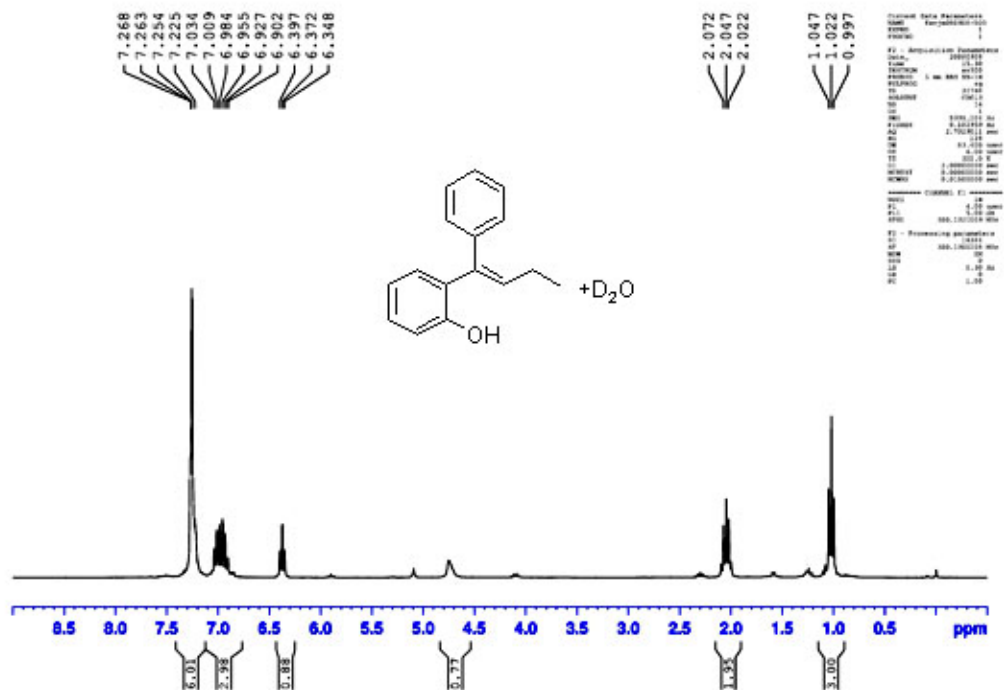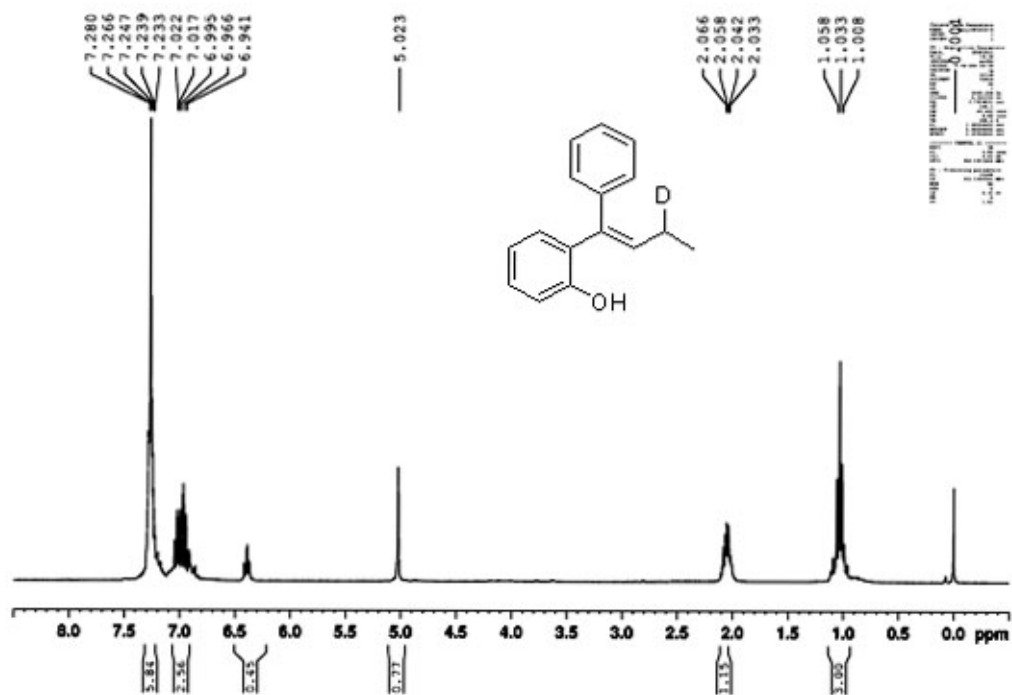

3d

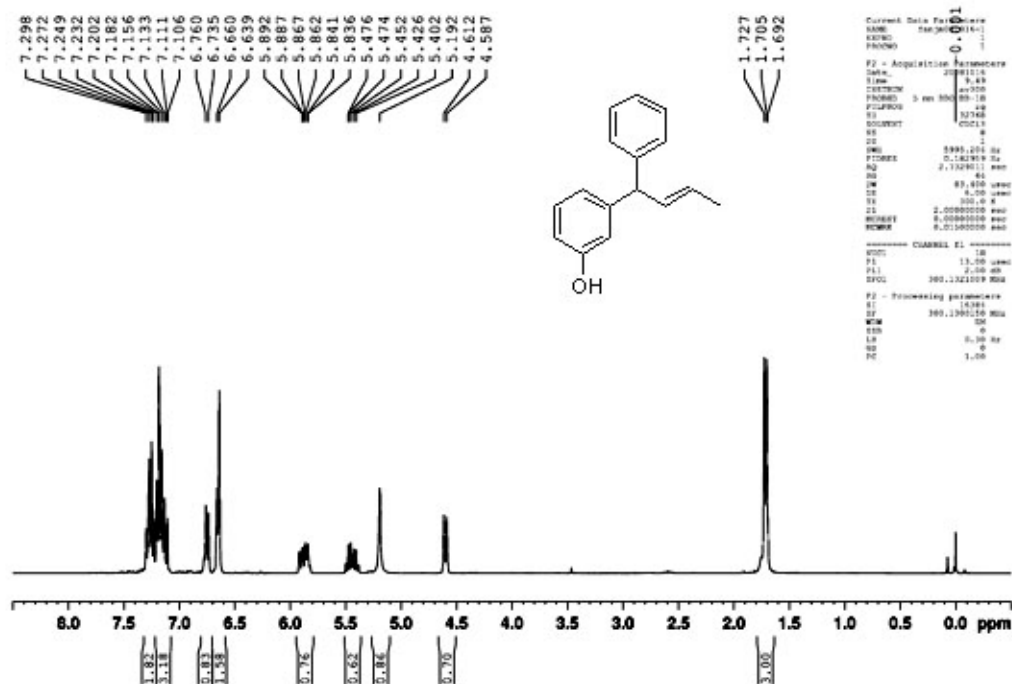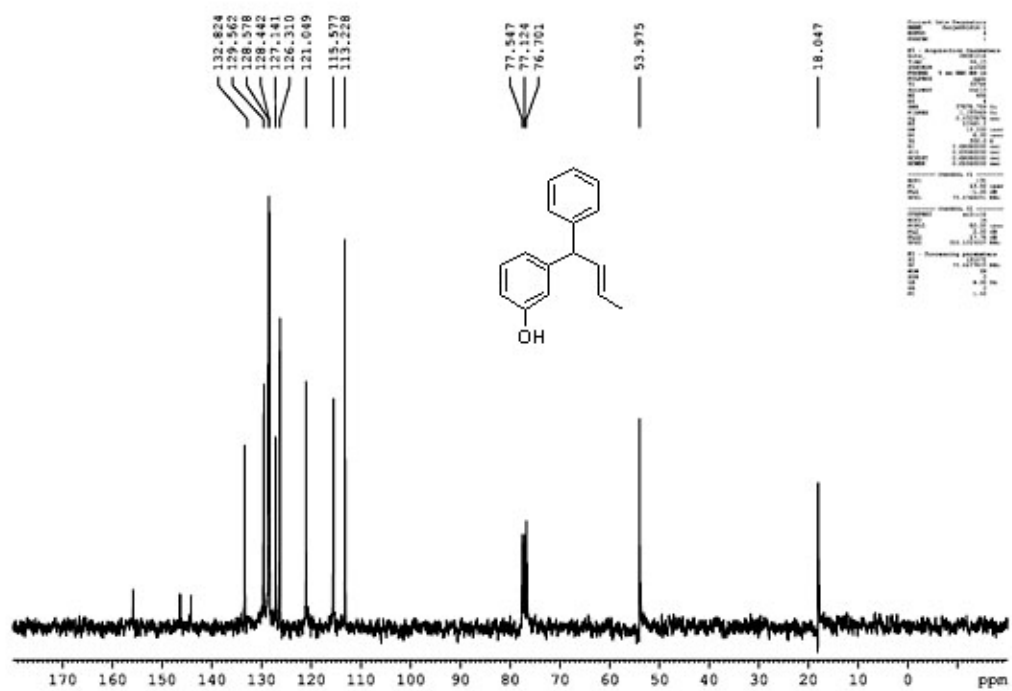

2f

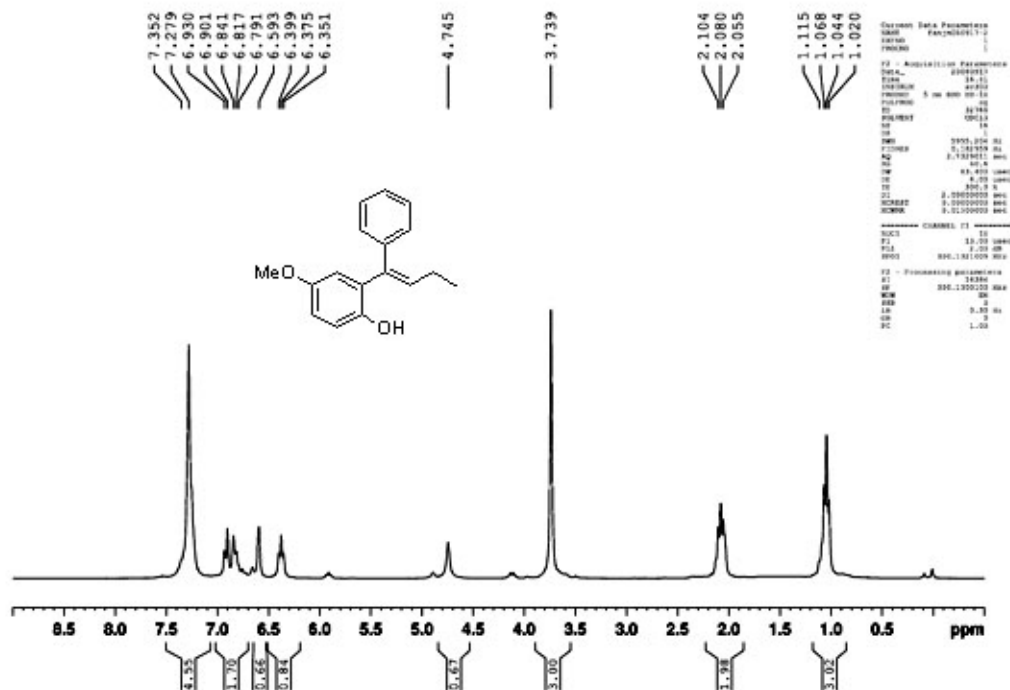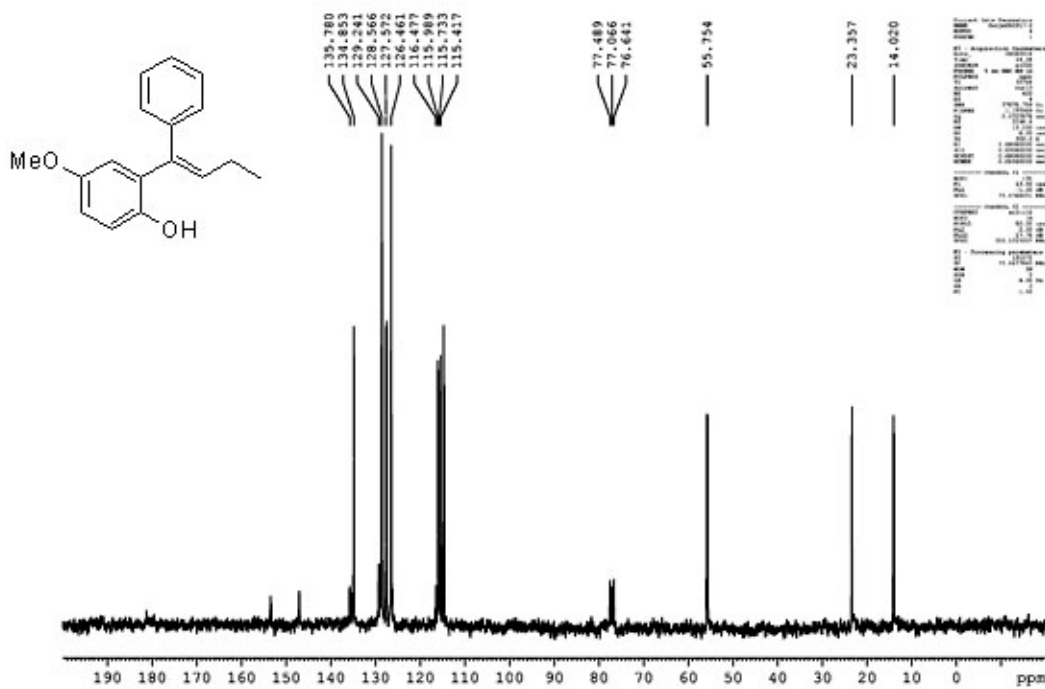

2g

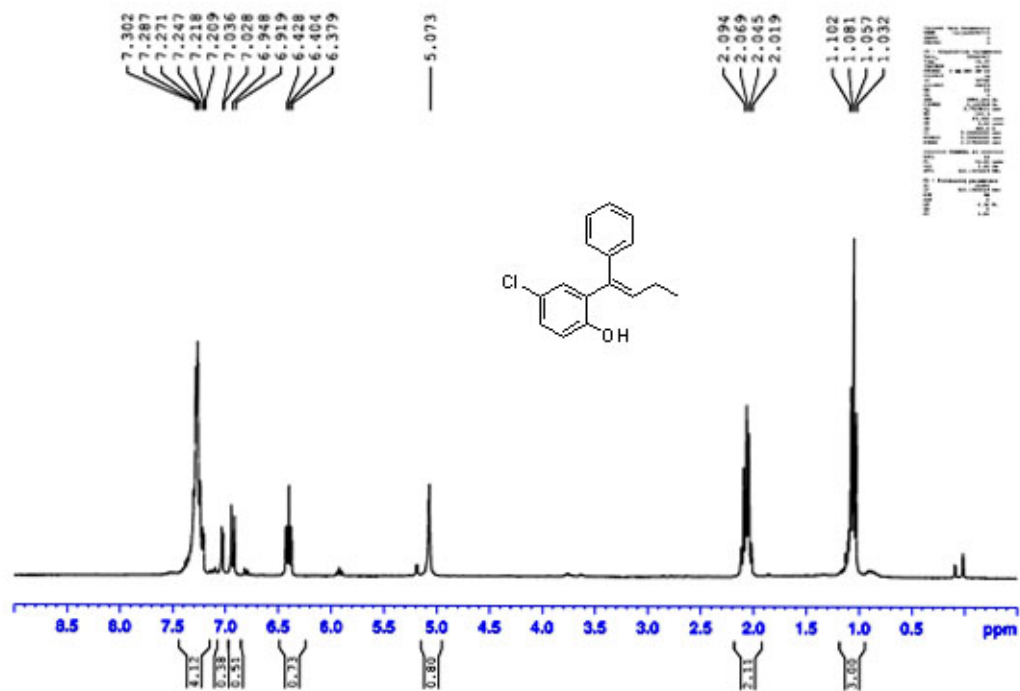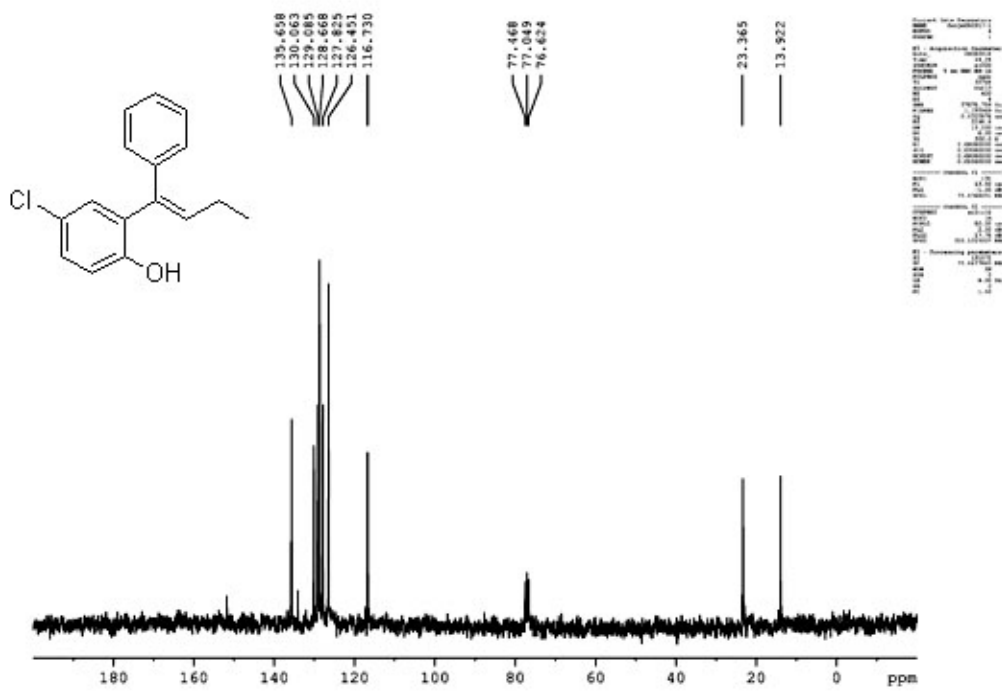

2h

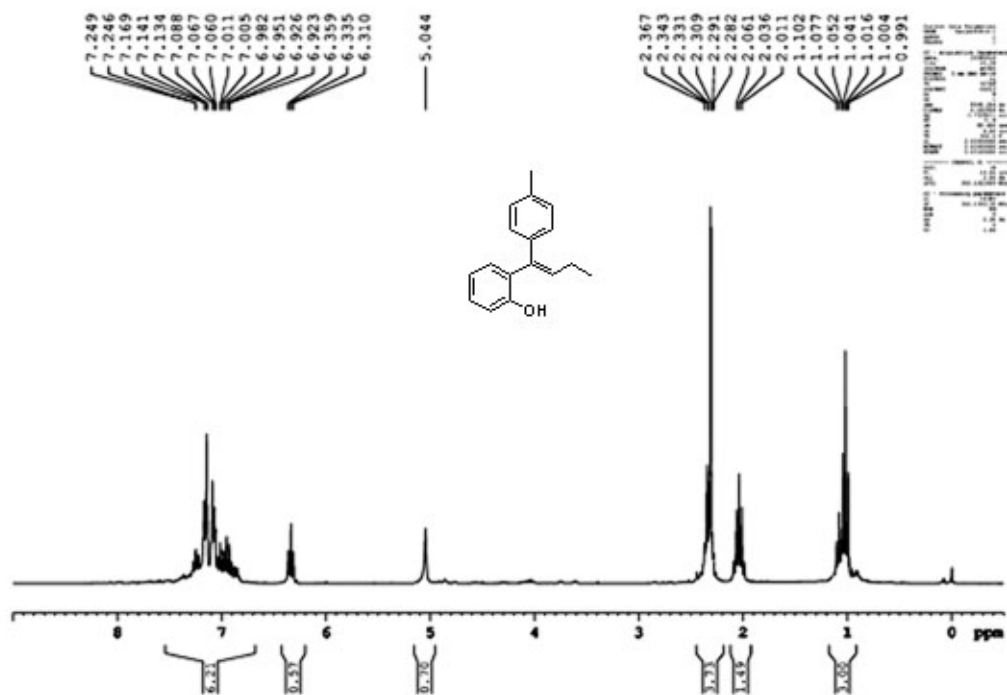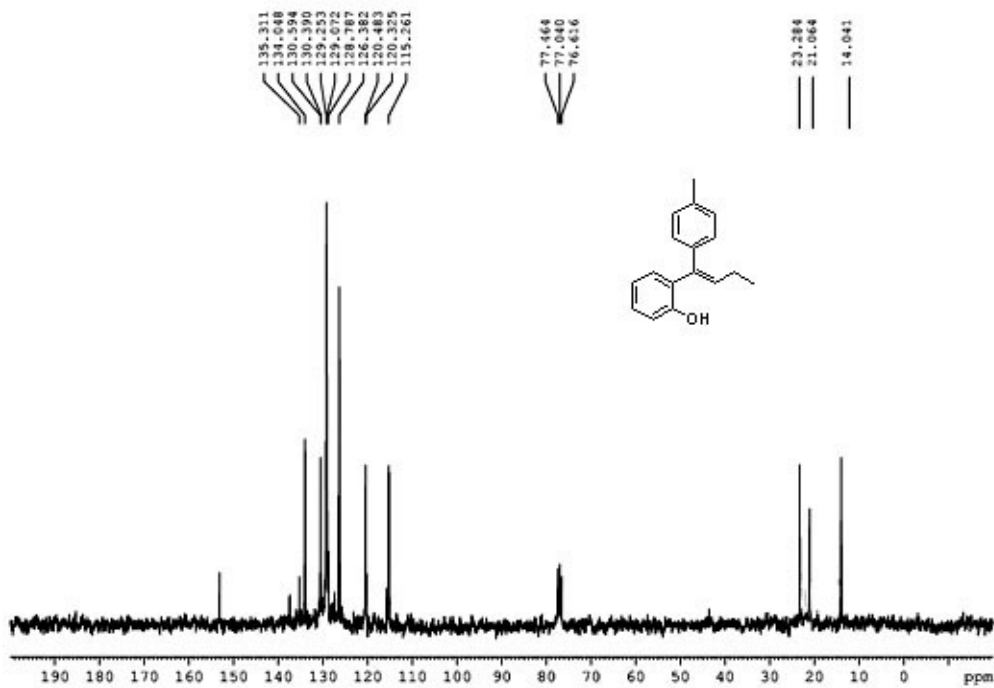

2i

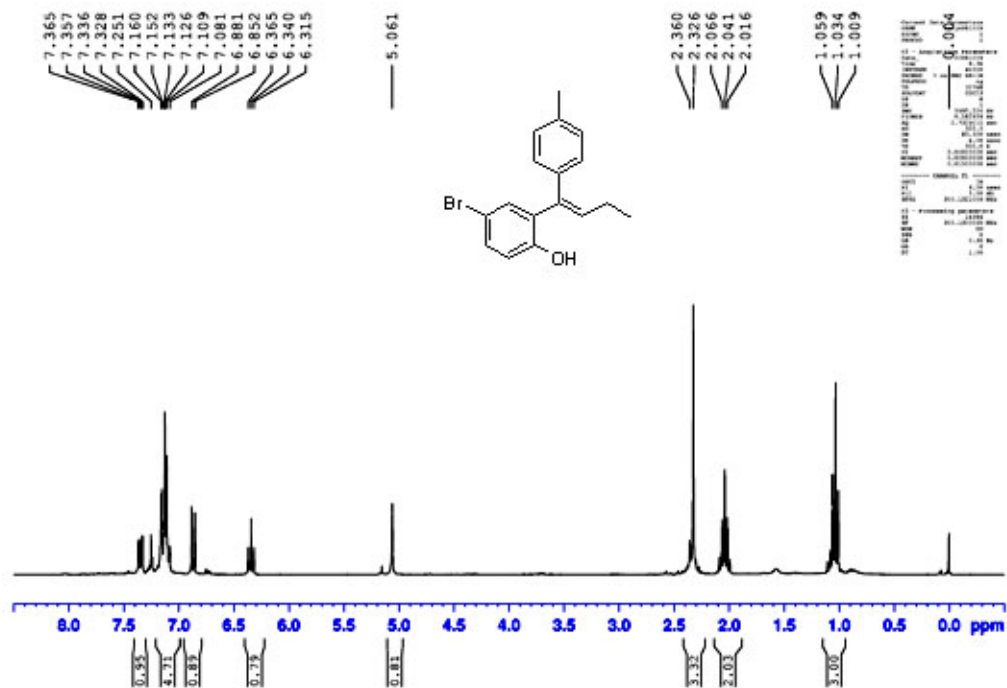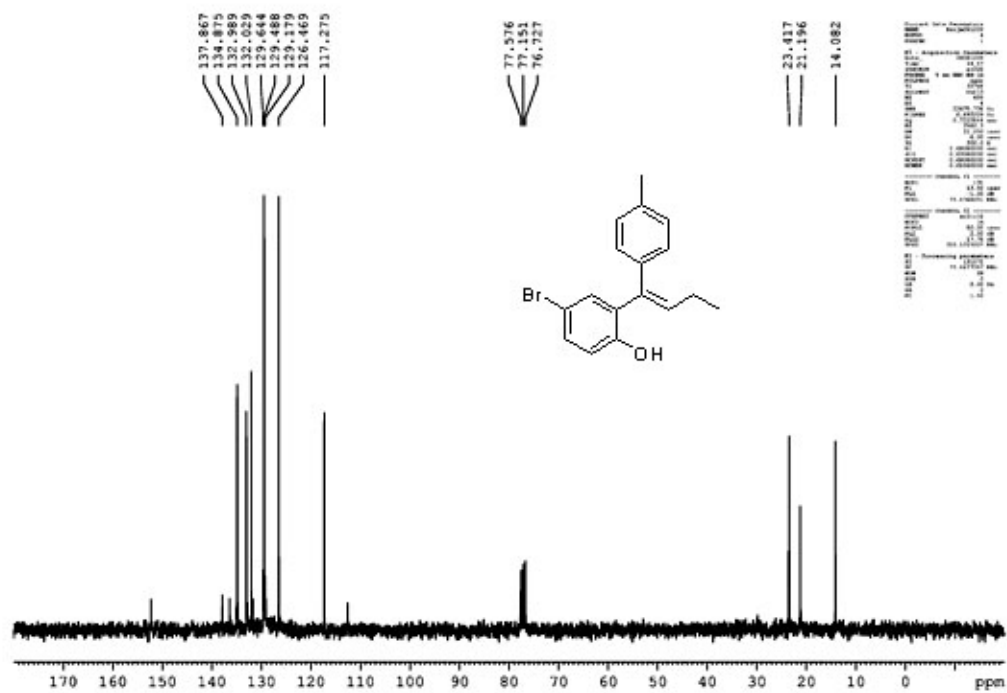

2j

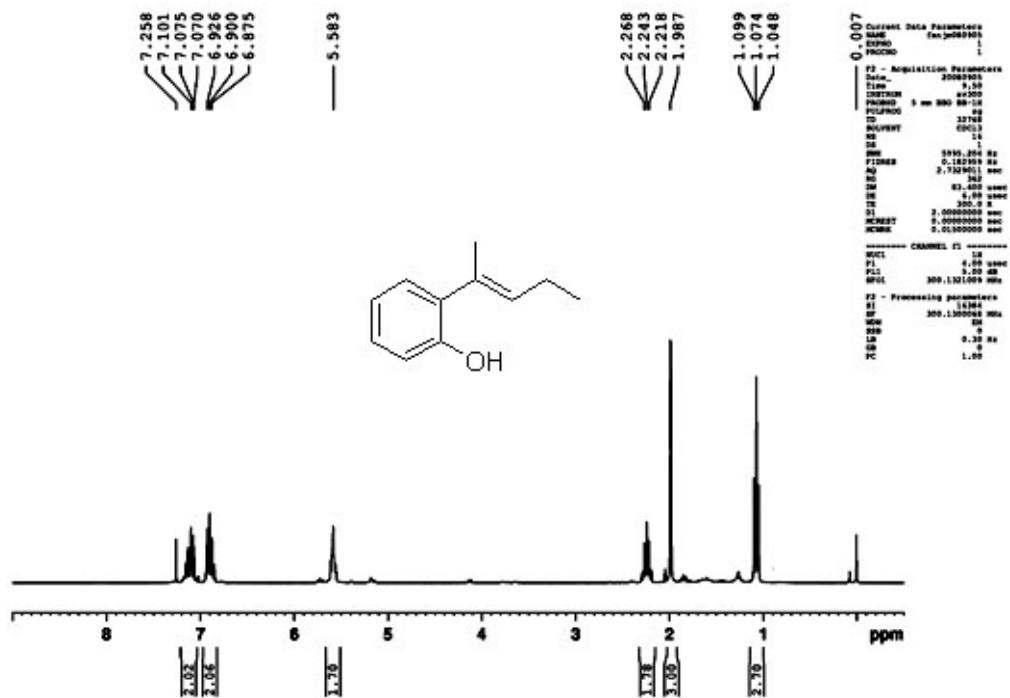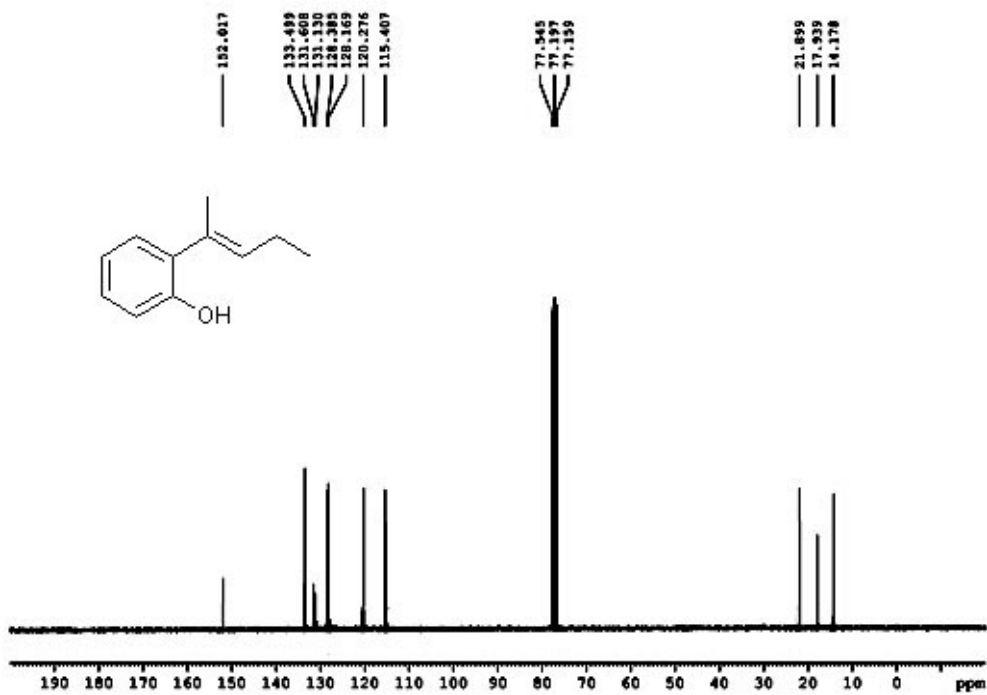

2k

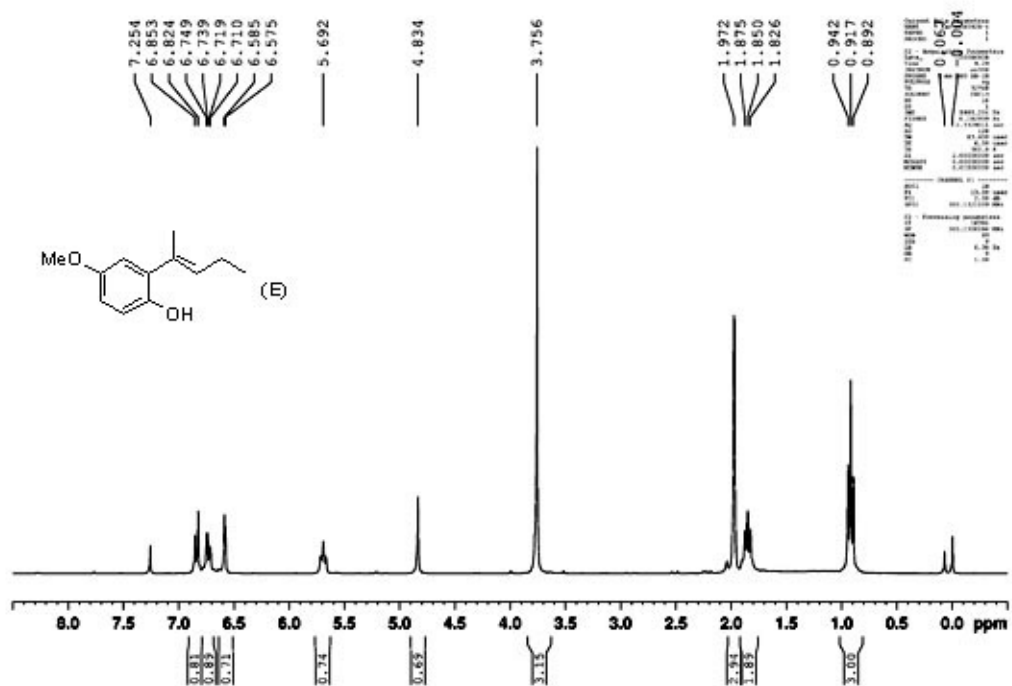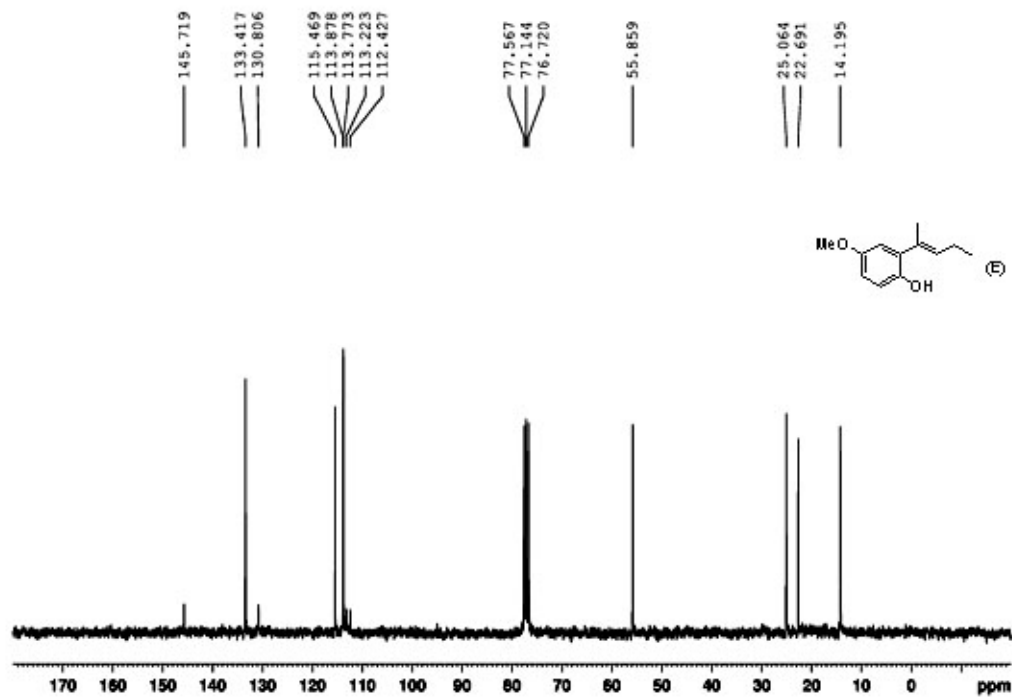



21

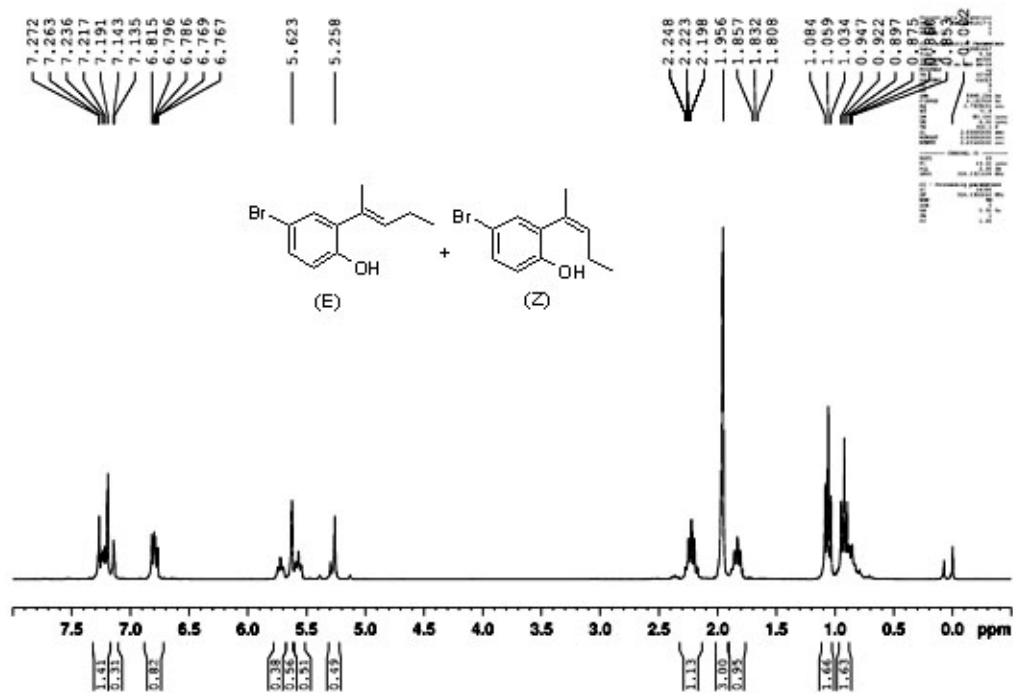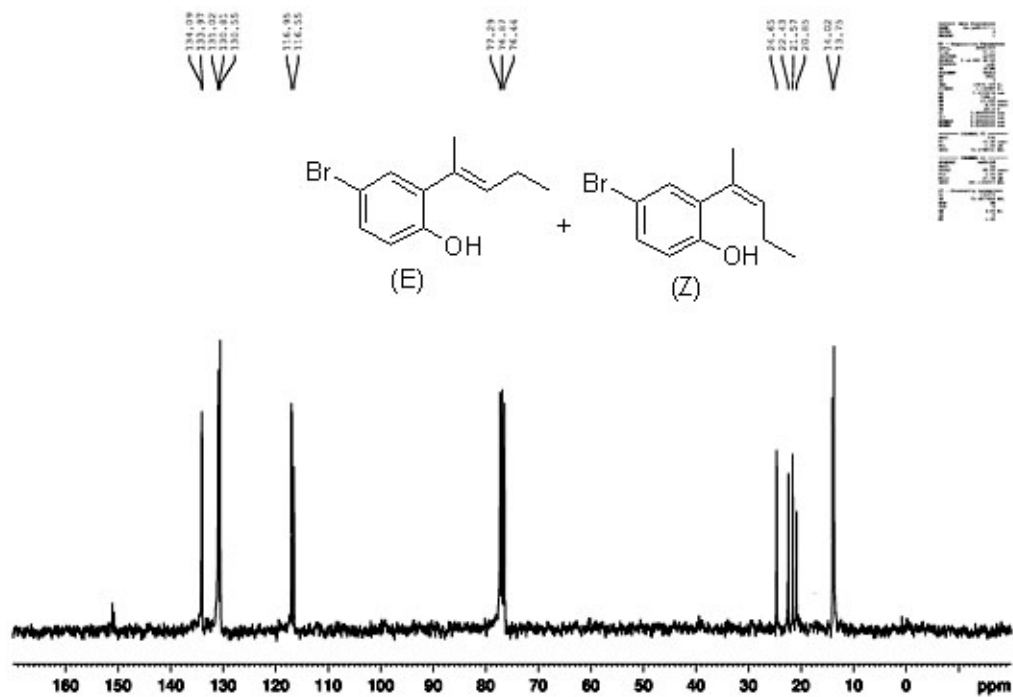

2m

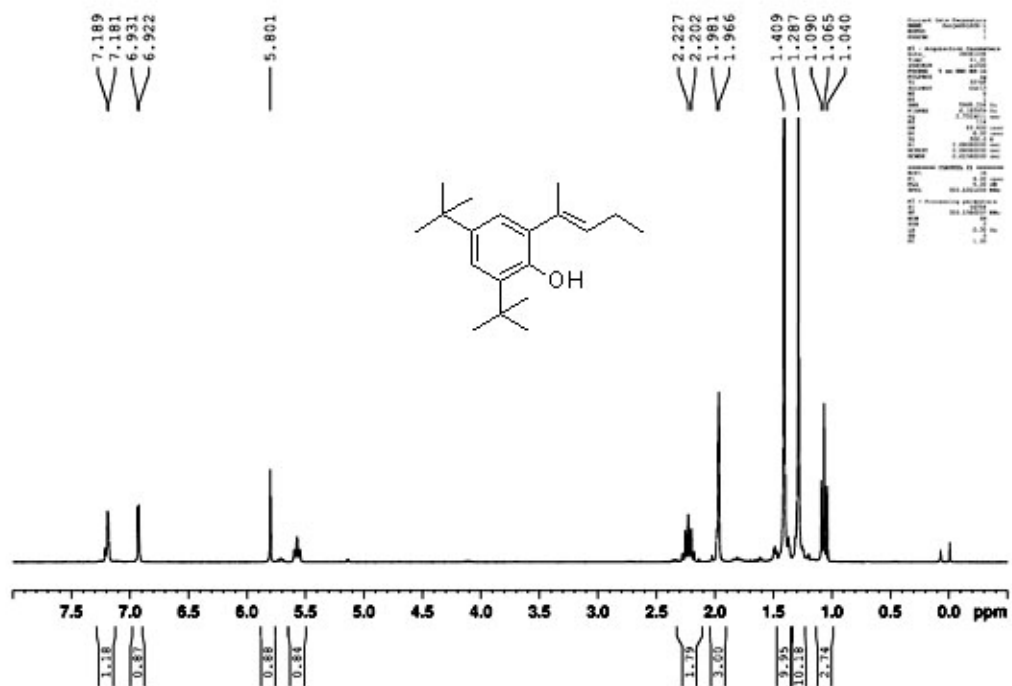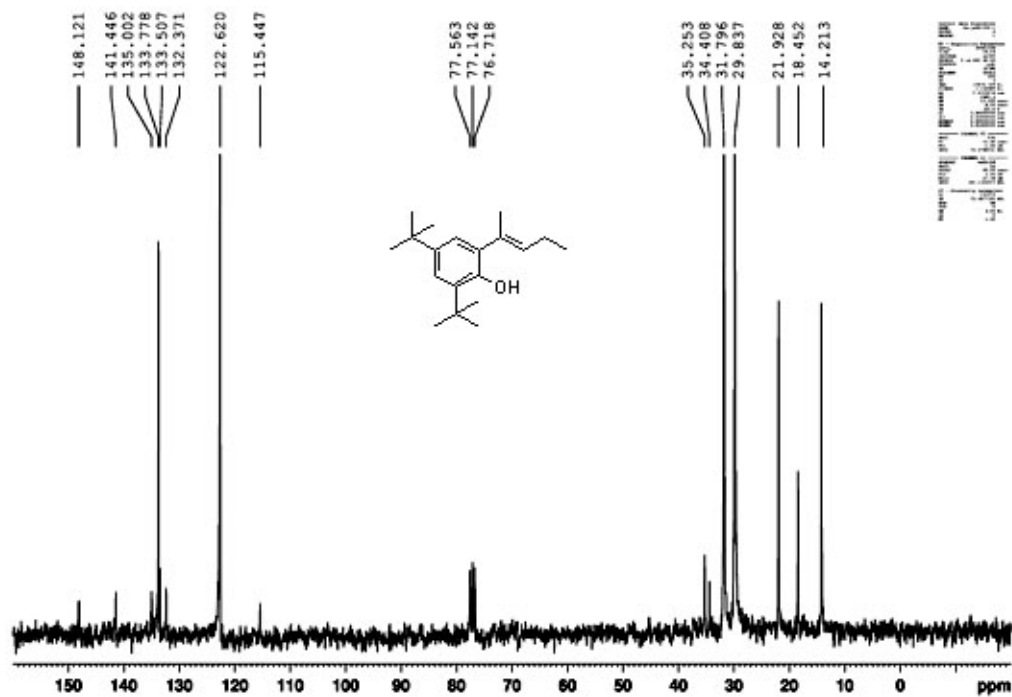

2n

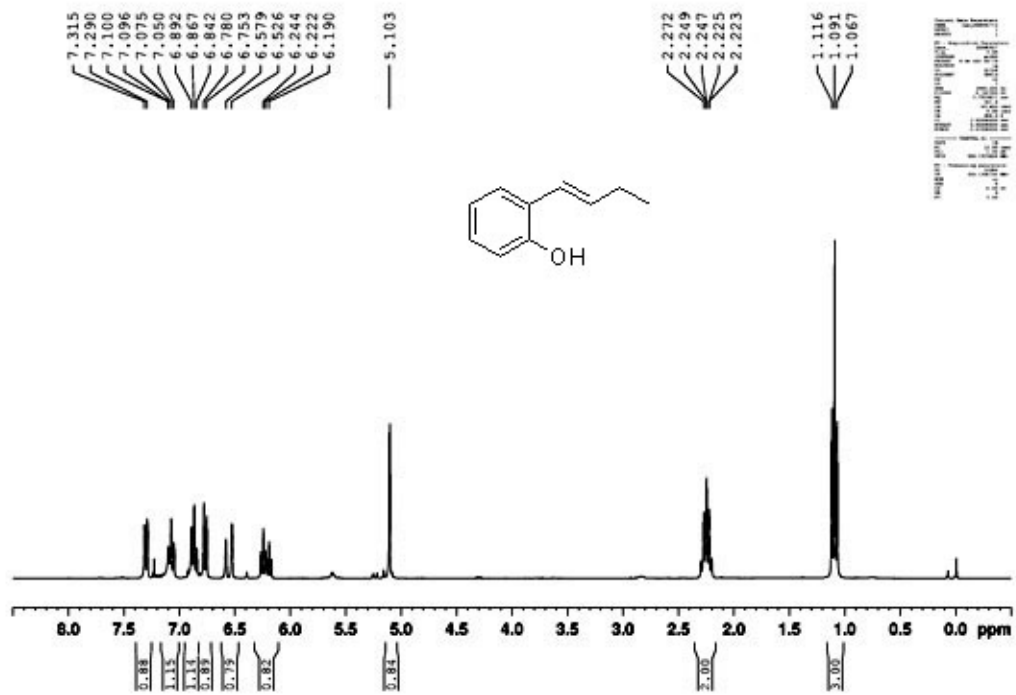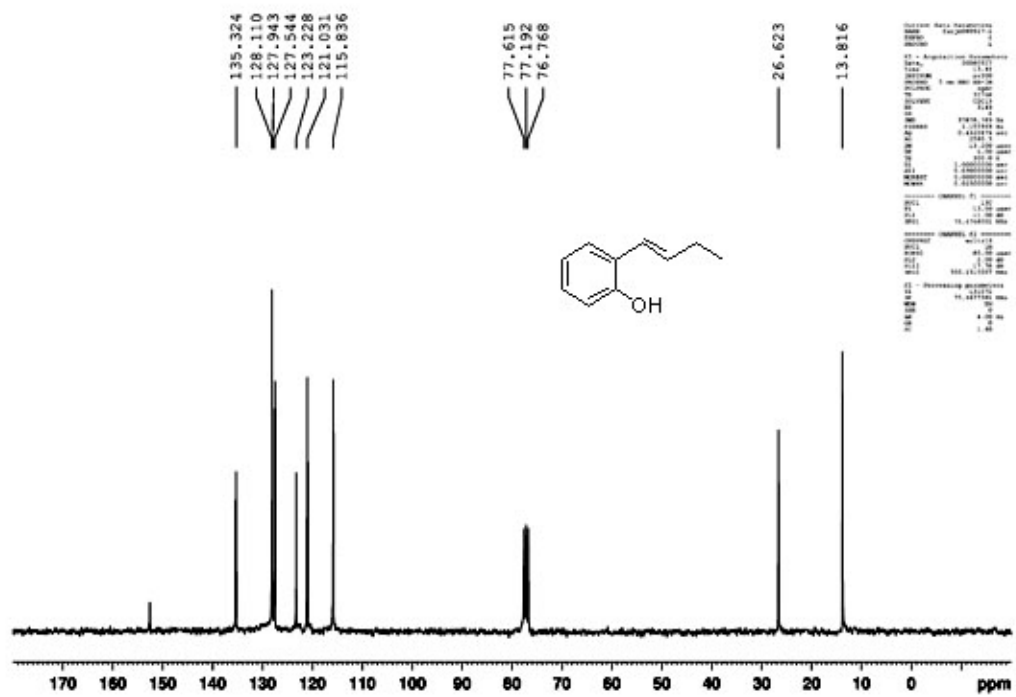

20

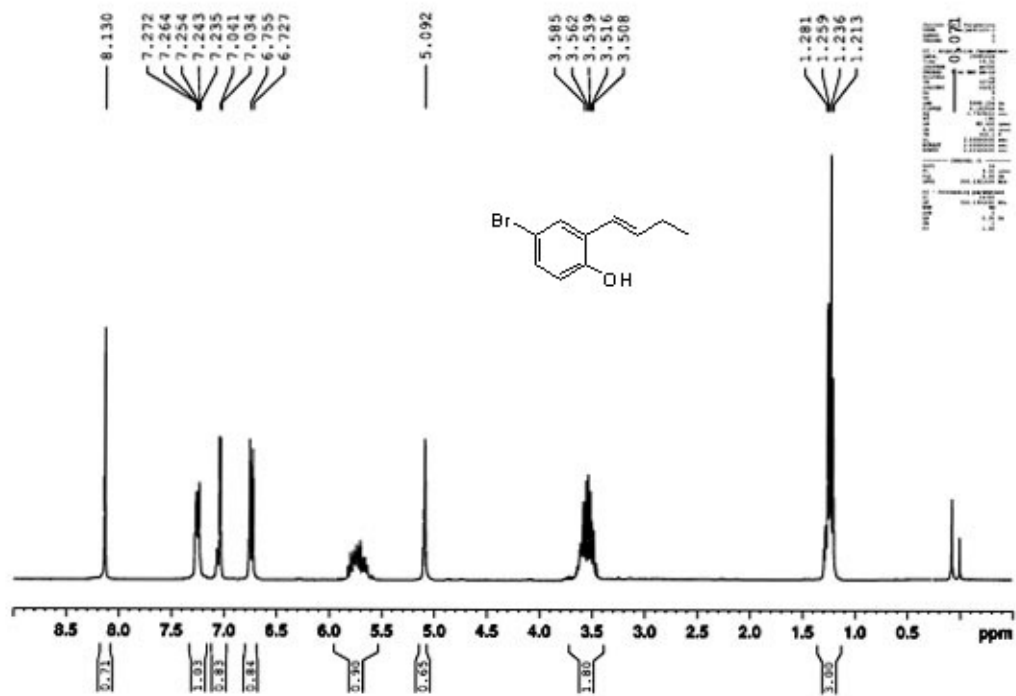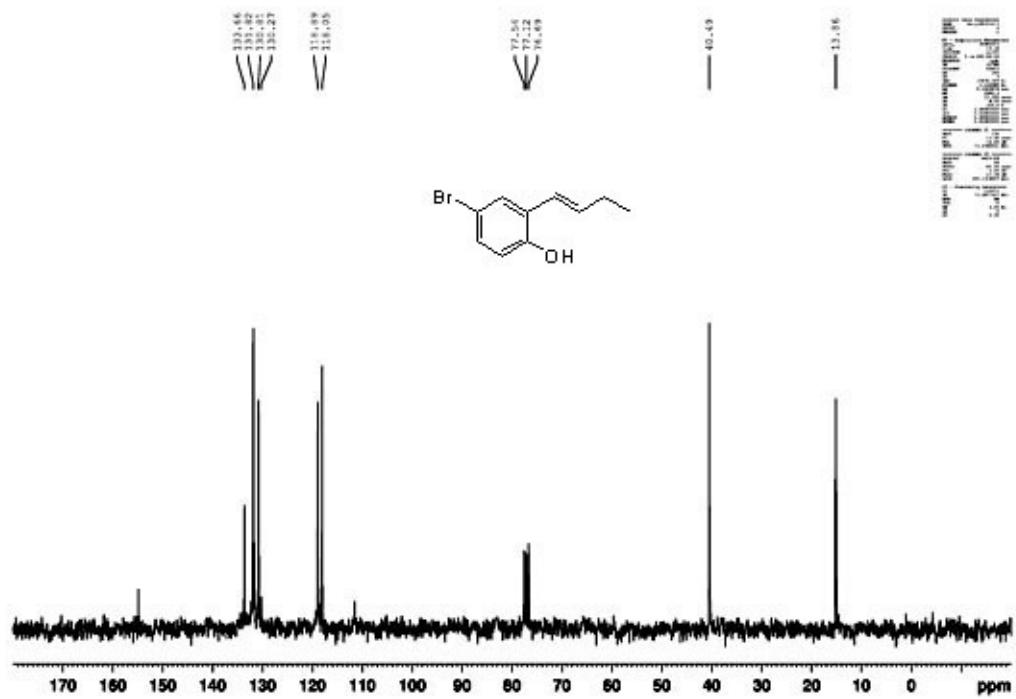

2p

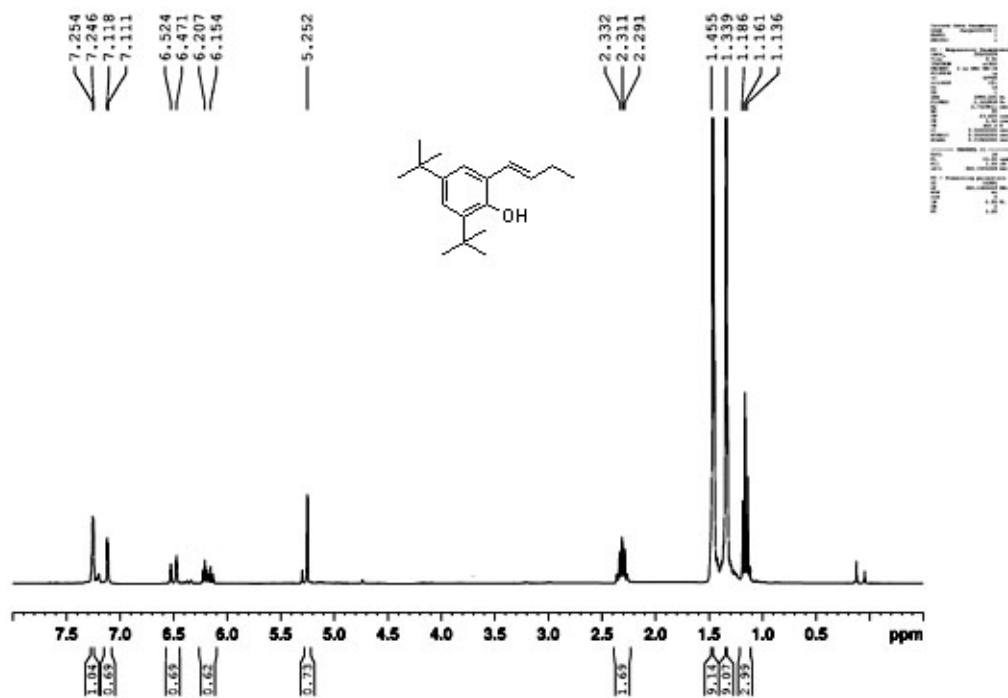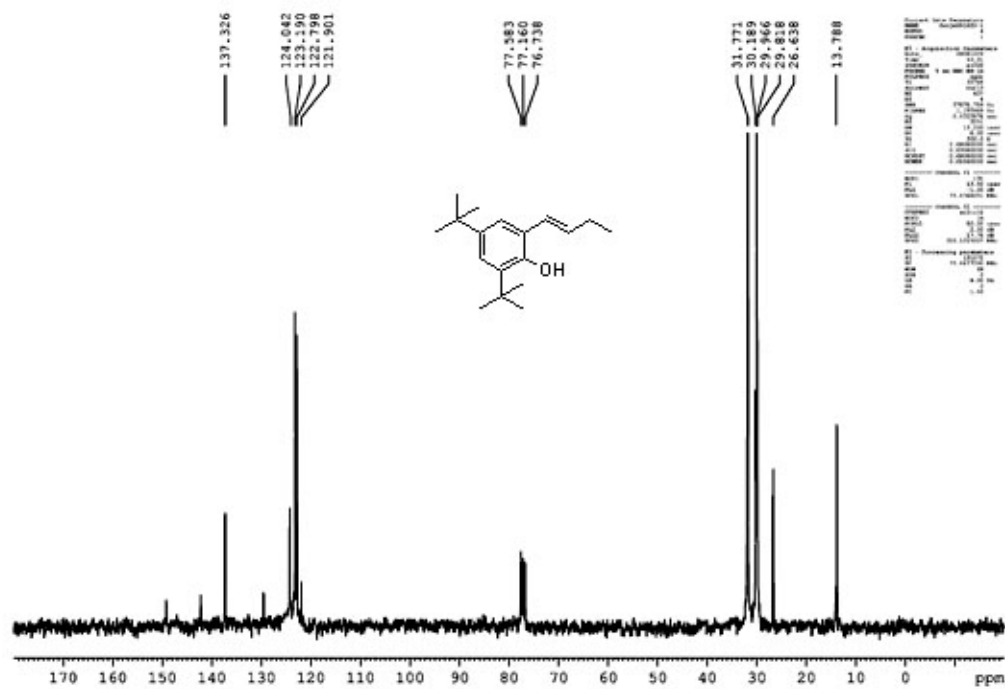

4a

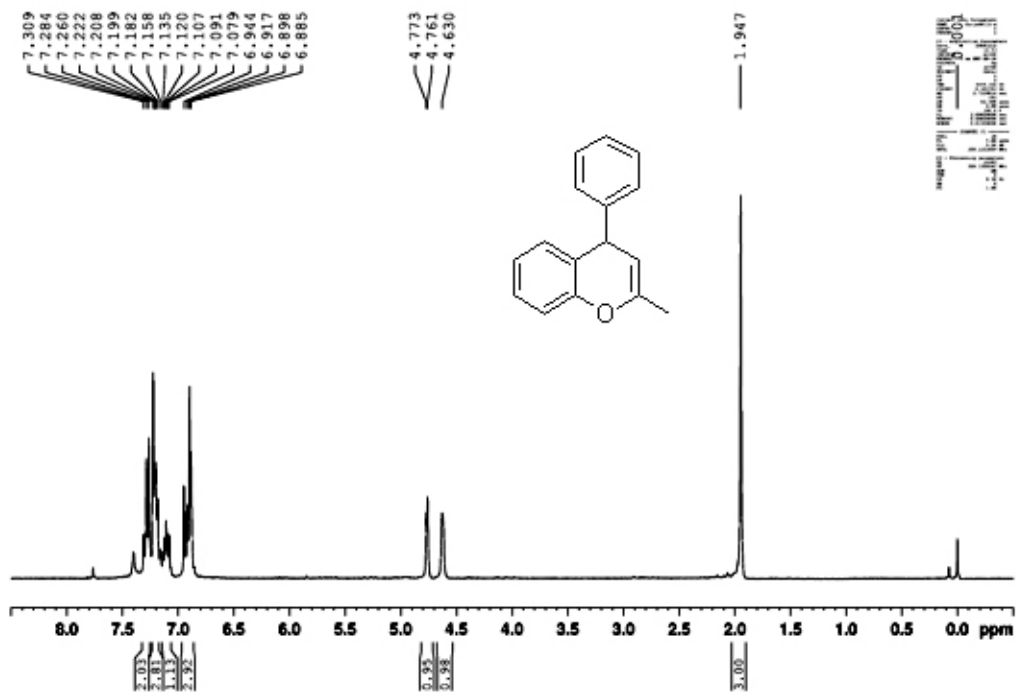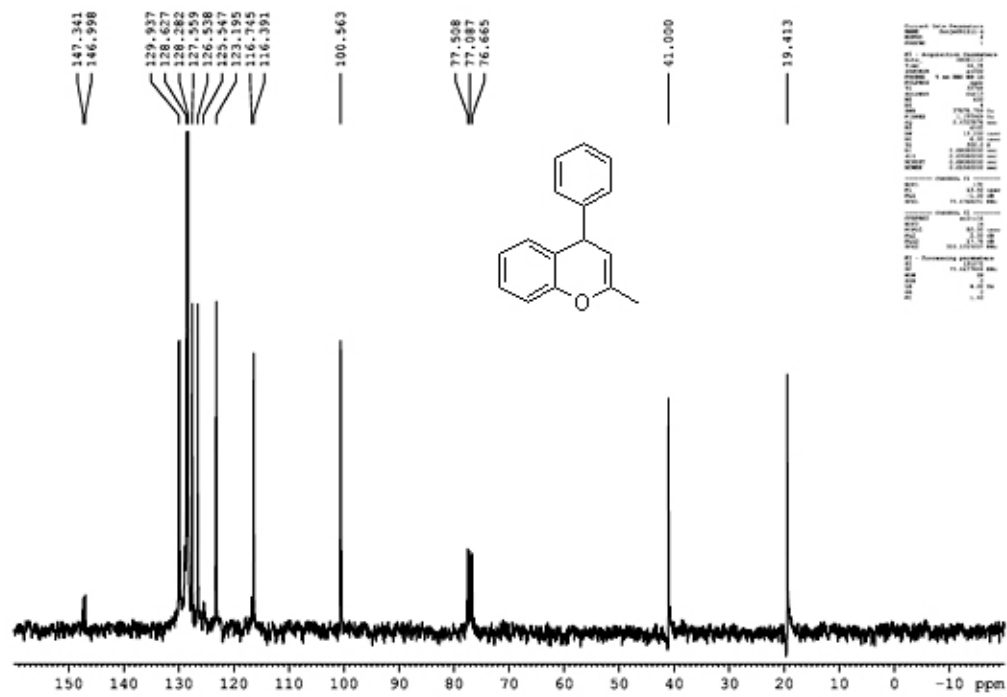

5a

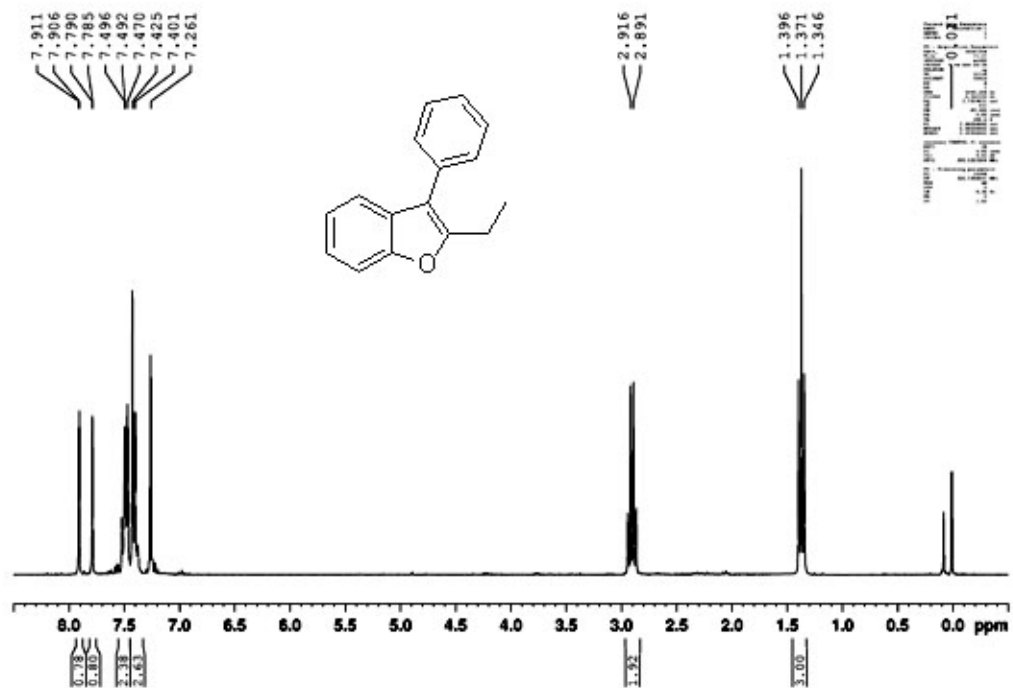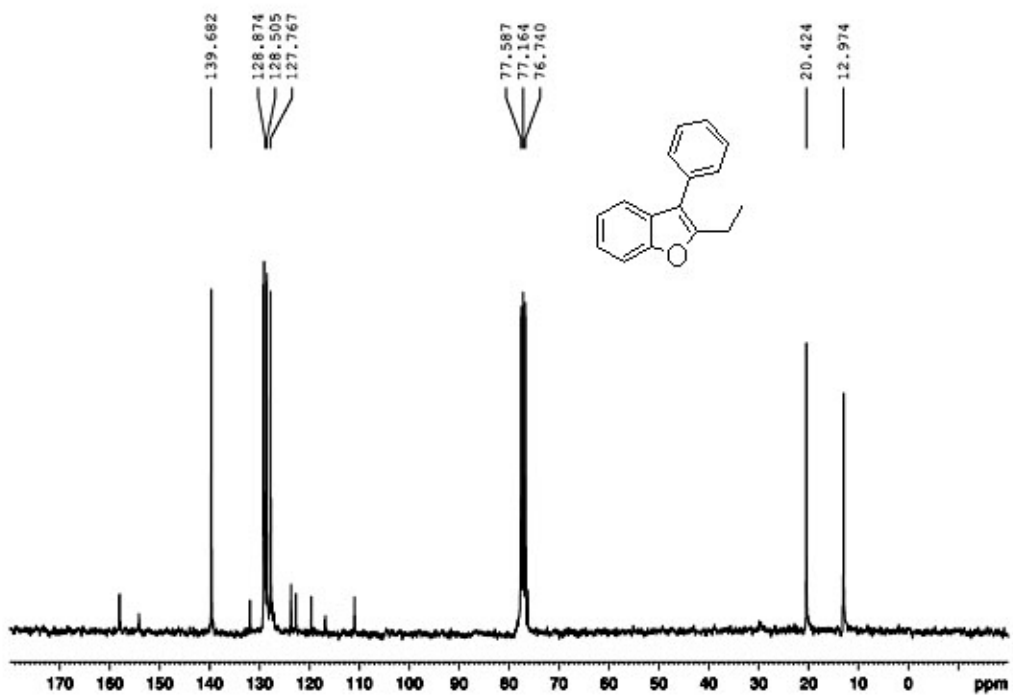





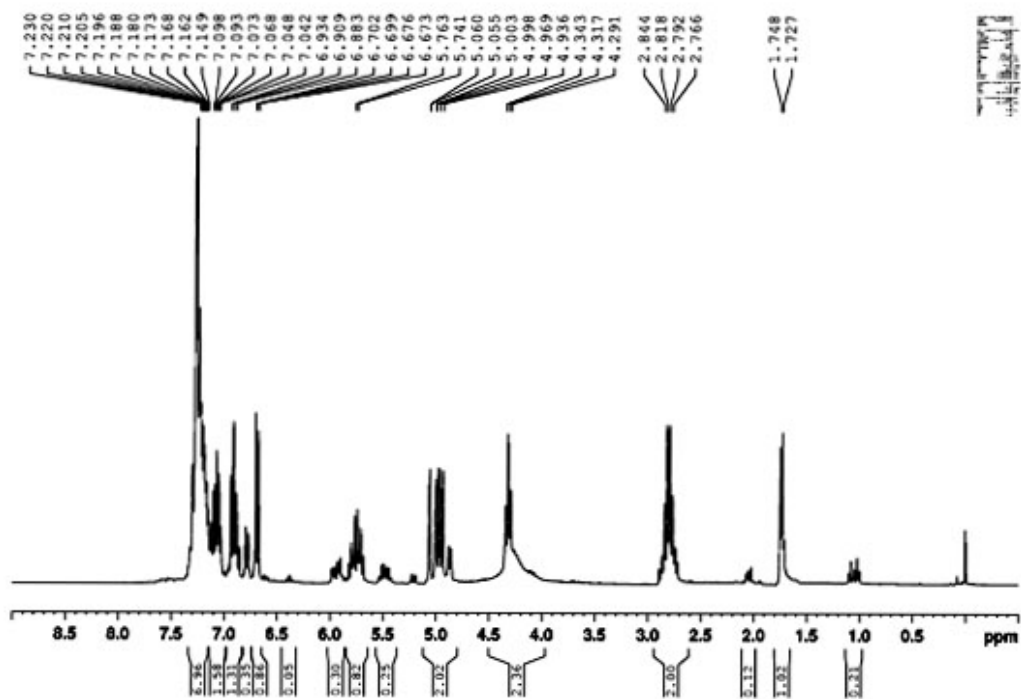

30 min

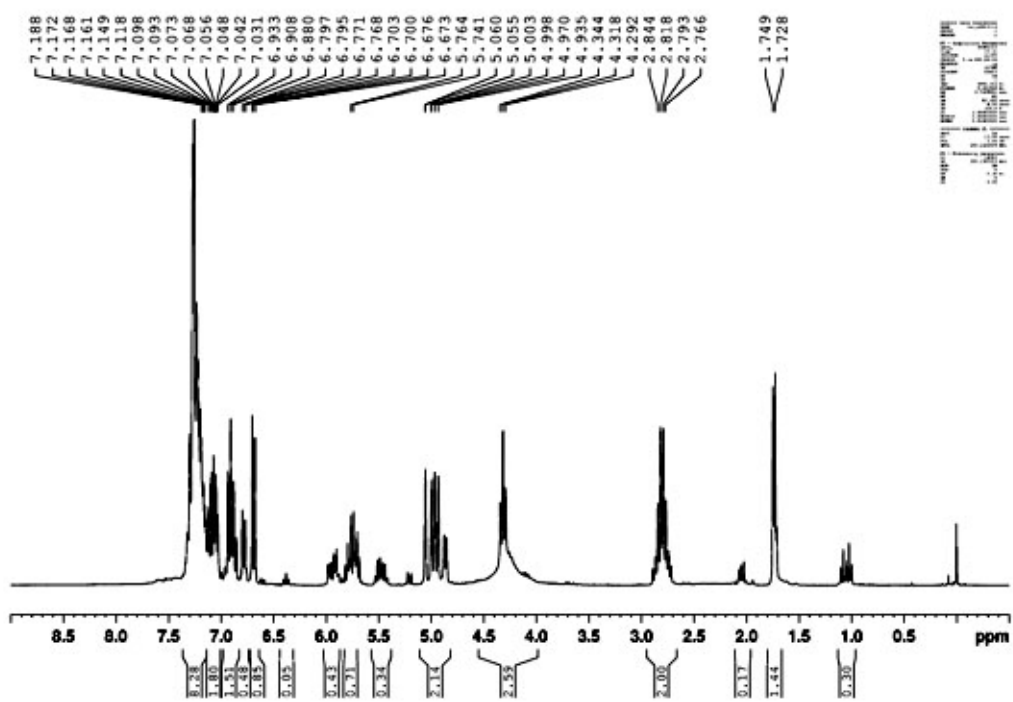

45 min

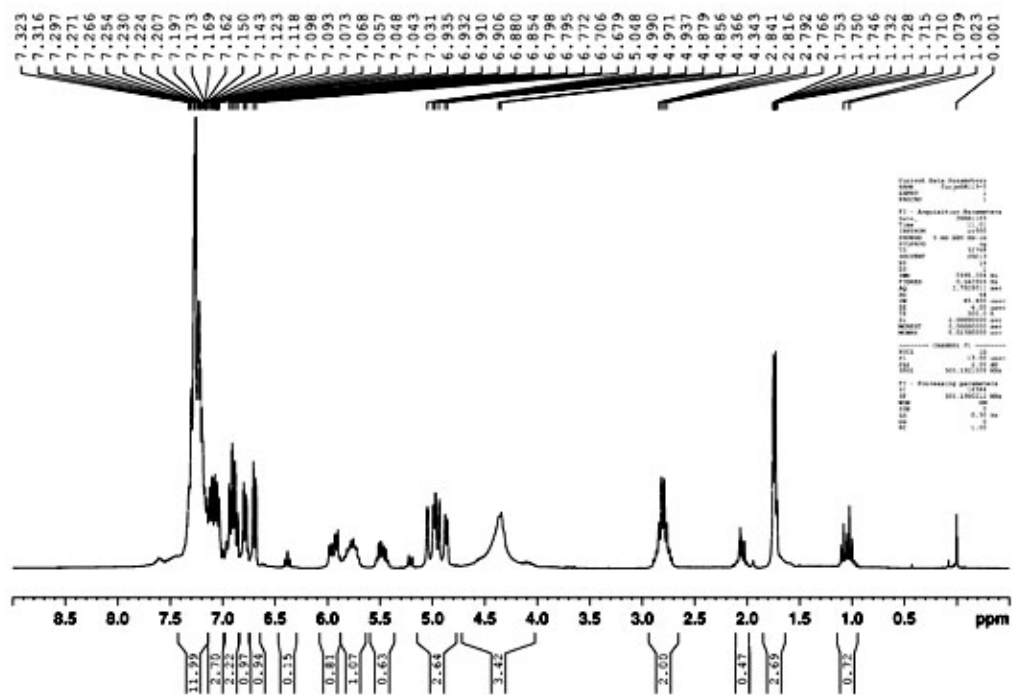

1h

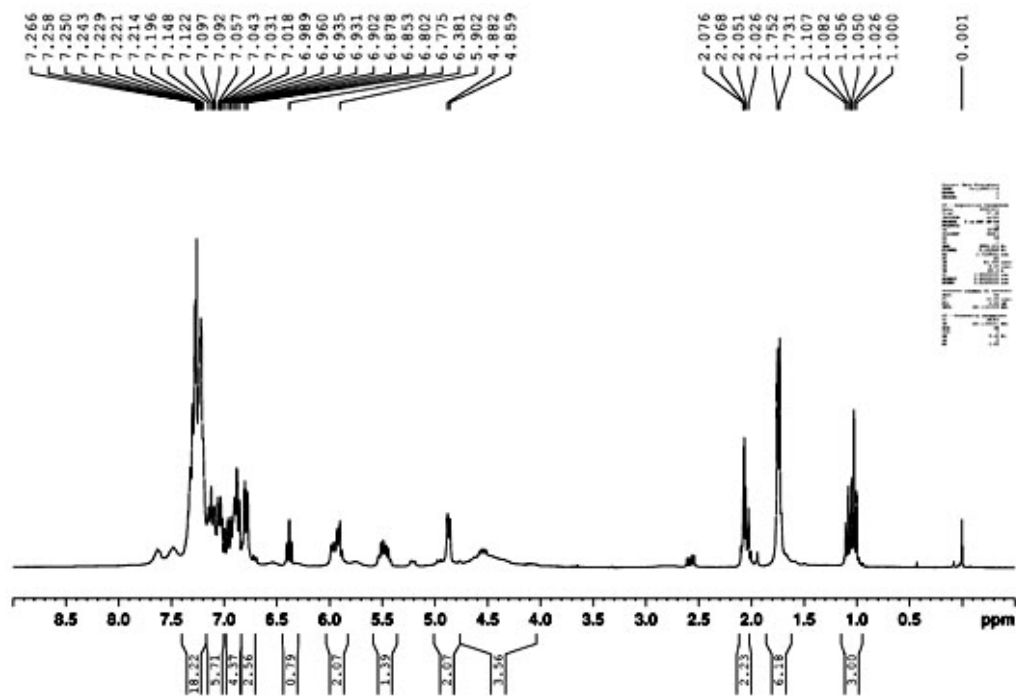

4h

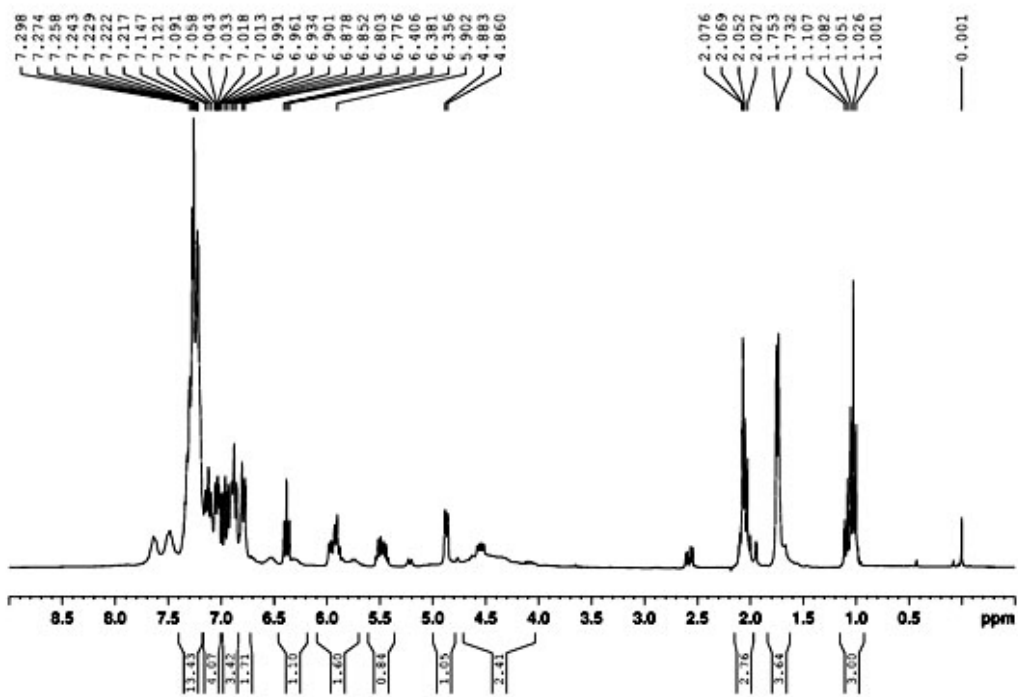

6h

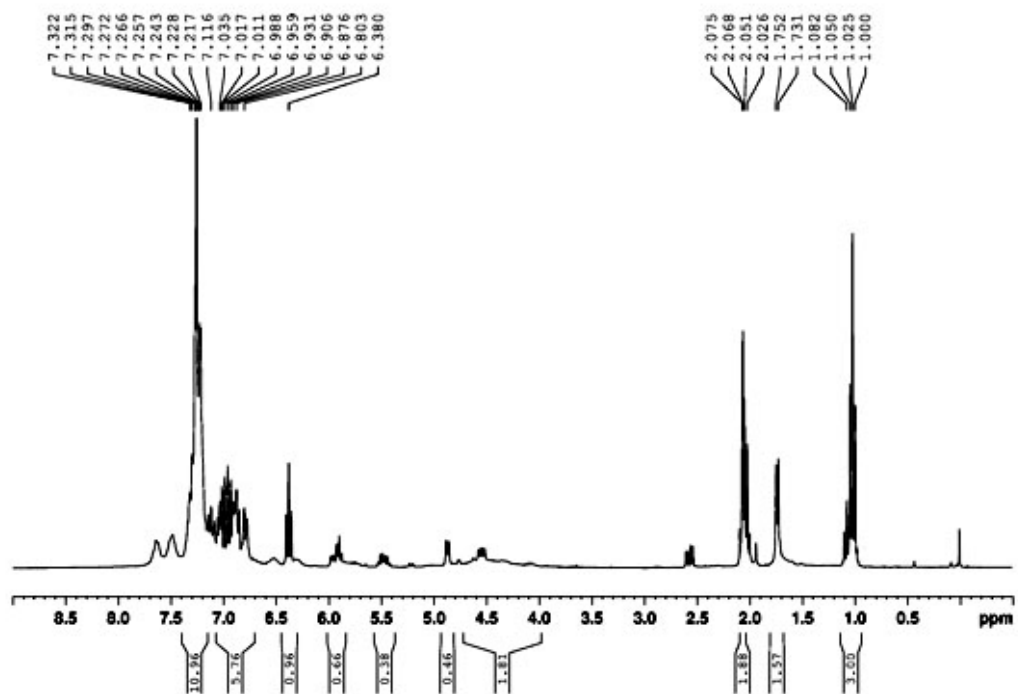

8h

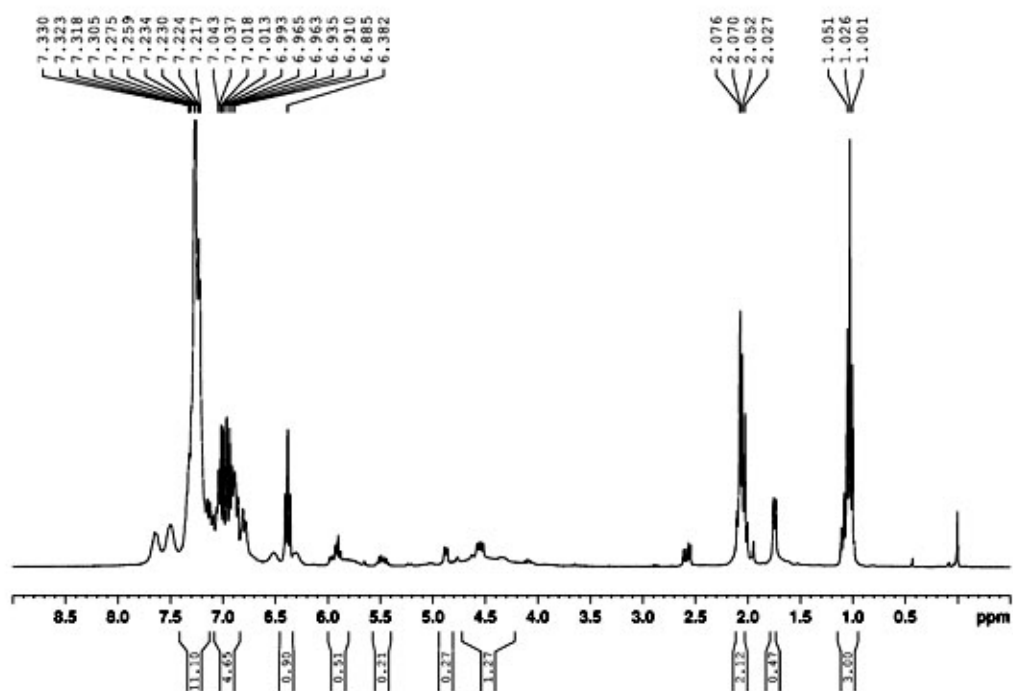

12h

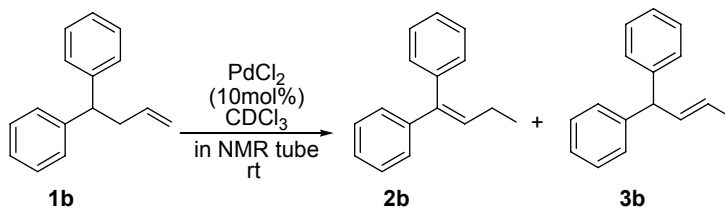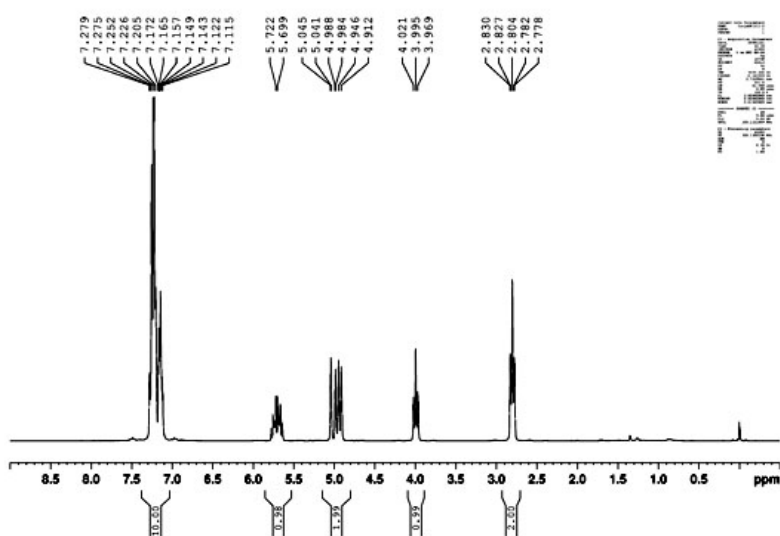

5min

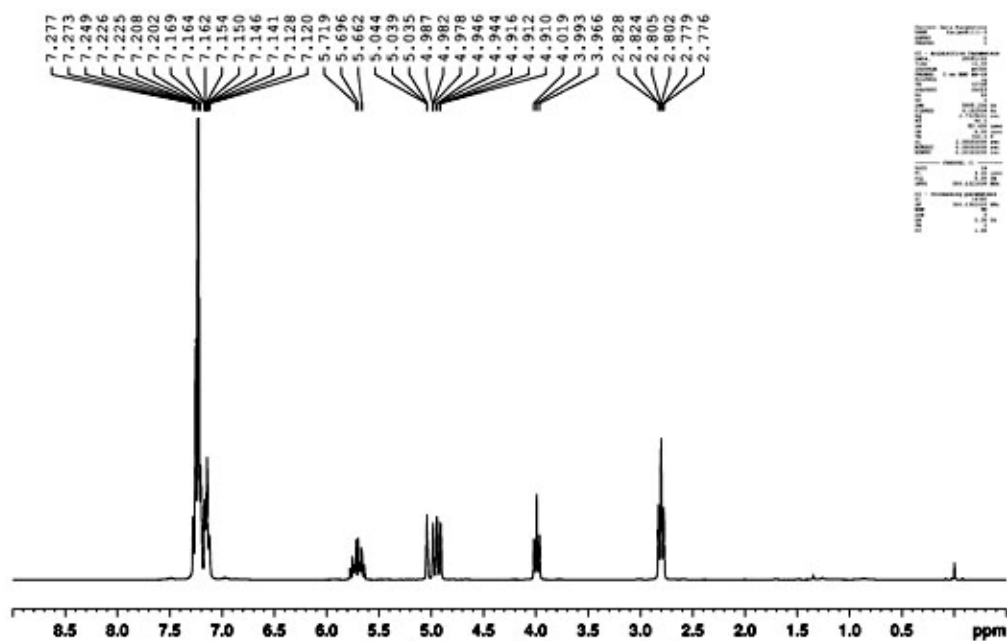

20min

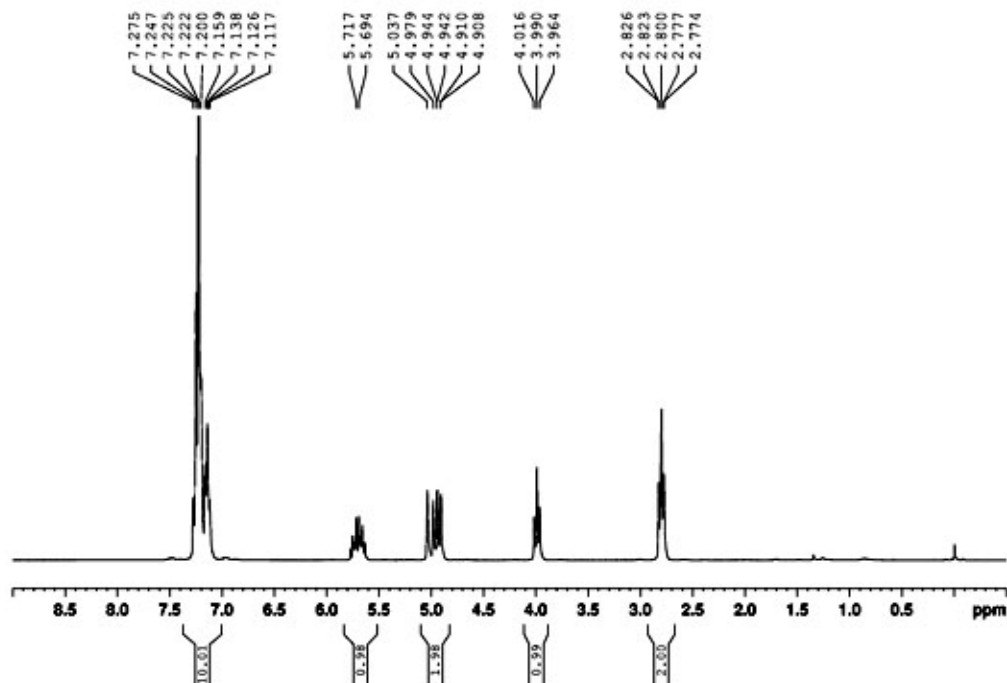

30min

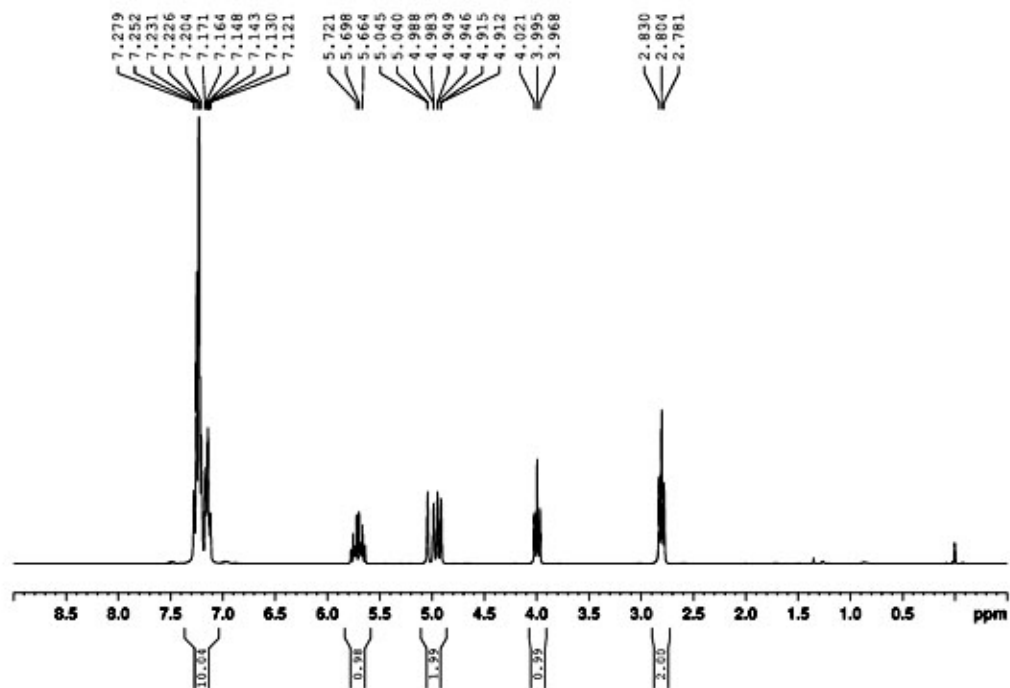

1h

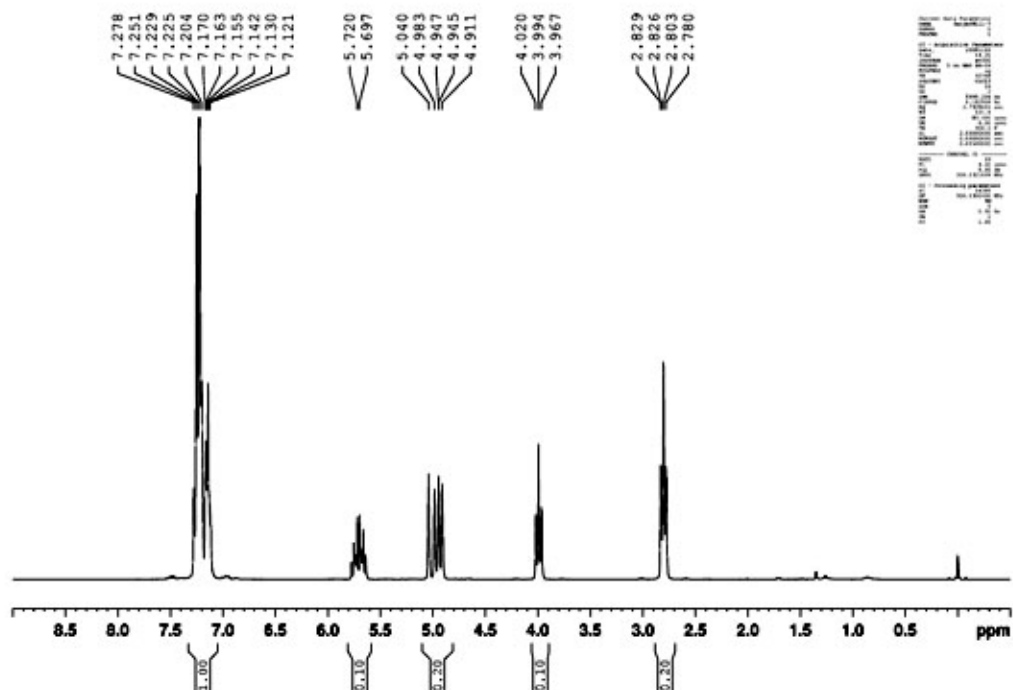

4h

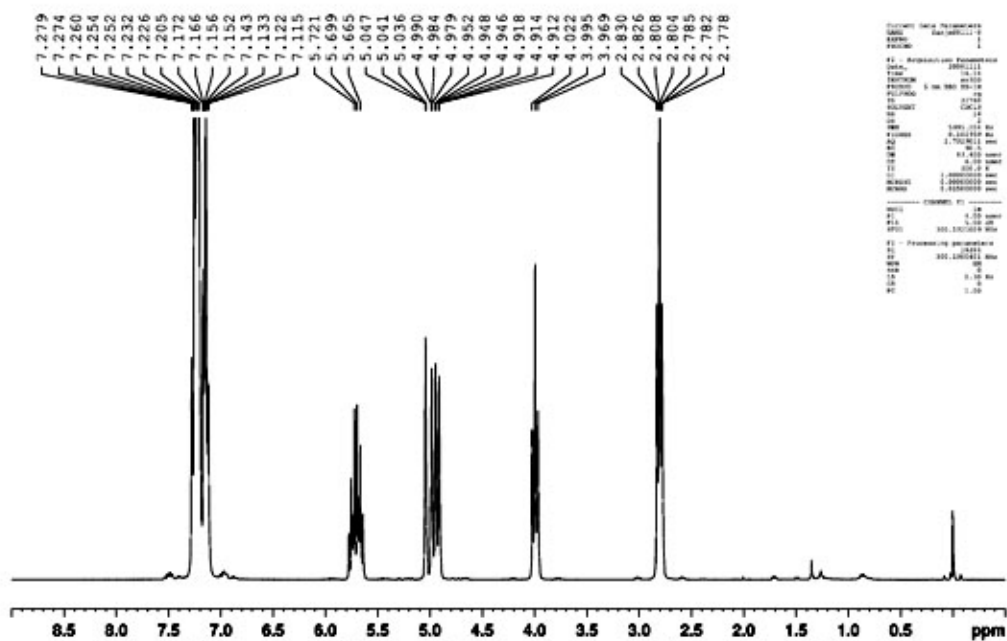

6h

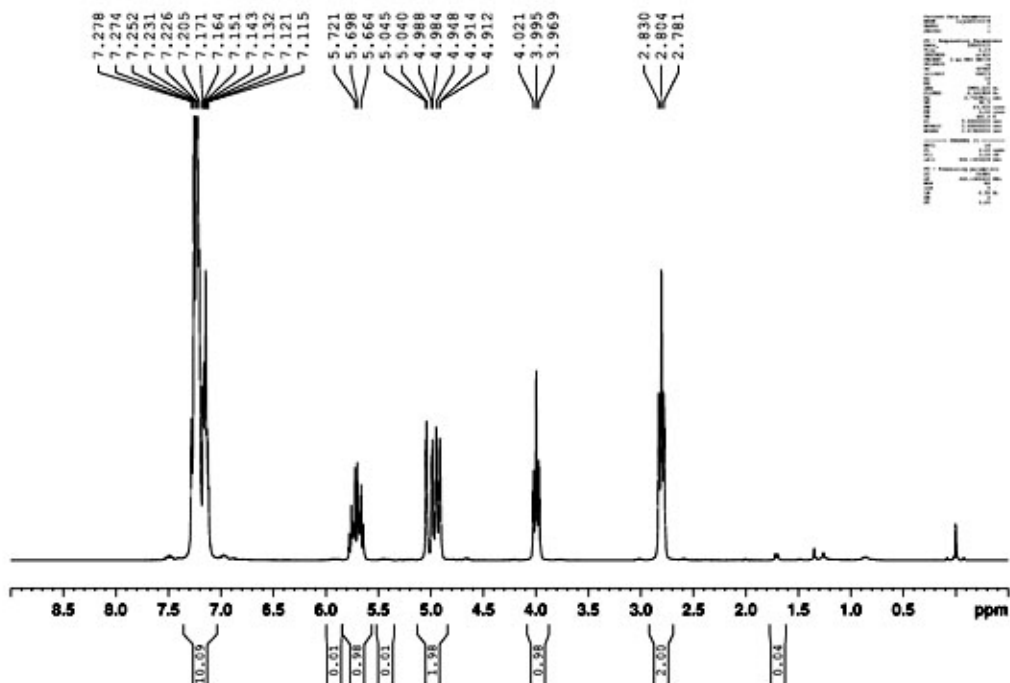

18h

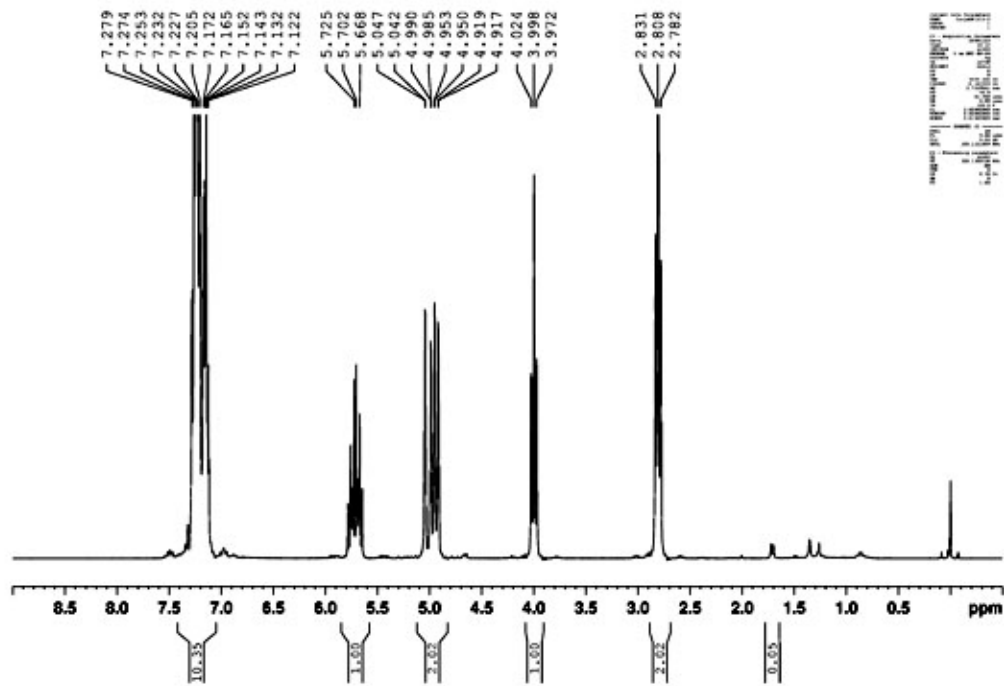

30h

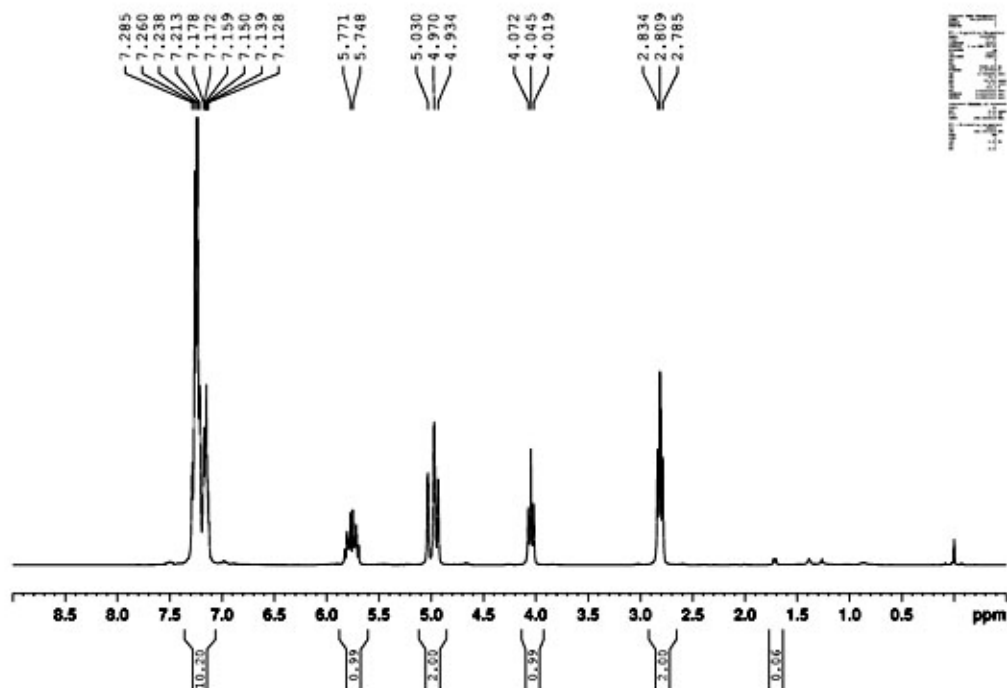

45h





NOESY of 2a

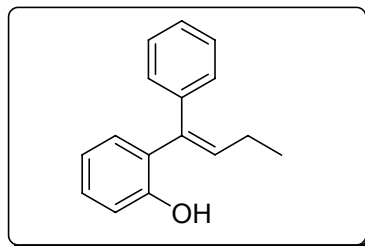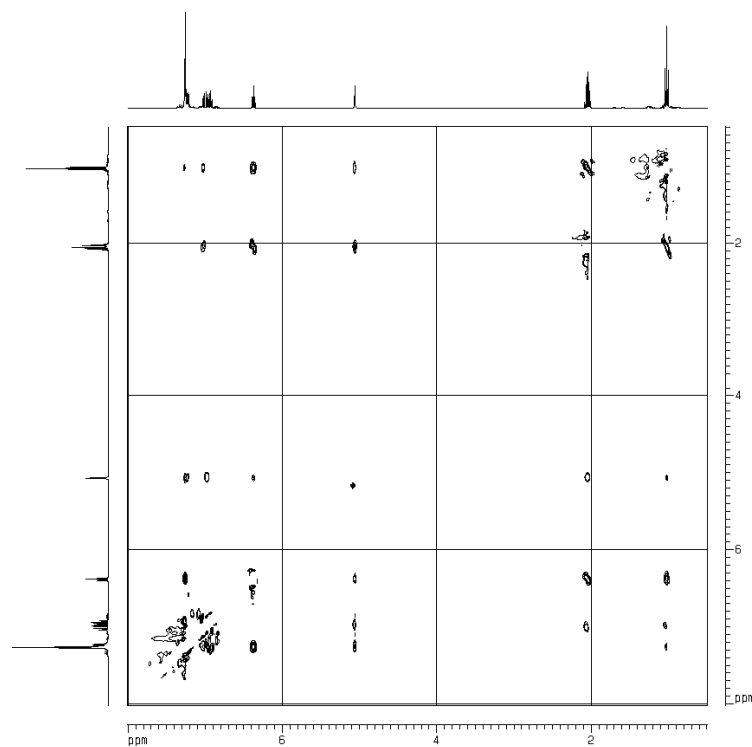

```

Current Data Parameters
NAME: KUL09-fan050229-1
EXPNO: 12
PROCNO: 1
-----
F2 - Acquisition Parameters
Date_ 20090303
Time 21.09
INSTRUM: spect
PROBHD: 5 mm QNP 1H-1
PULPROG: zgpg30
TD: 65536
SOLVENT: CDCl3
NS: 16
DS: 4
SWH: 4065.433 Hz
F2FREQ: 300.135000 MHz
AQ: 0.1278700 sec
RG: 61.5
DN: 124.800 uS
DE: 15.00 uS
TE: 300.2 K
DQ: 0.50011488 sec
DI: 2.50000000 sec
DD: 1.00000000 sec
ZWD: 0.00000000 sec
-----
CHANNEL f1 -
NUC1: 1H
P1: 12.00 uS
PL1: -3.00 dB
SFO1: 400.1325000 MHz
-----
F1 - Acquisition Parameters
SI: 1
ID: 536
SFO1: 400.131818 MHz
FREQES: 10.559249 MHz
SN: 10.5113 dBm
P1PROG: zgpg30
-----
F2 - Processing parameters
SI: 32768
SF: 400.130646 MHz
WDW: EM
SSB: 0
LB: 0.00 Hz
GB: 0
PC: 1.00
-----
F1 - Processing parameters
SI: 32768
SF: 400.130646 MHz
WDW: EM
SSB: 0
LB: 0.00 Hz
GB: 0
PC: 1.00
-----
(2) NMR plot parameters
CH2: 15.00 cm
CH1: 15.00 cm
P0PLD: 0.000 dBm
P0PLC: 3000.00 Hz
P0PLH: 0.480 dBm
P0PLI: 180.00 Hz
P1PLD: 0.017 dBm
P1PLC: 3007.00 Hz
P1PLH: 0.480 dBm
P1PLI: 180.00 Hz
P0PDM: 0.000000 dBm/cm
P1PDM: 300.00011 Hz/cm
P1PDM: 0.001000 dBm/cm
P1PDM: 300.04418 Hz/cm
    
```
